# Supplementary material for: Elucidation of Mechanisms of Topotecan-Induced Cell Death in Human Breast MCF-7 Cancer Cells by Gene Expression Analysis
Source: Front Genet. 2020 Jul 17;11:775. doi: 10.3389/fgene.2020.00775 (PMC7379903; doi:10.3389/fgene.2020.00775)
Supplement: TABLE S1 — Excel spreadsheet containing the TPT 24 h treatment differentially expressed genes. [file Table_1.XLSX]

## Sheet: Top_24hr_vs_Control_24hr_FDR_LT
Accession #	probeid	GeneSymbol	GeneName	p-value(Top * 24hr vs. Control * 24hr)	Ratio(Top * 24hr vs. Control * 24hr)	Fold-Change(Top * 24hr vs. Control * 24hr)
NM_001080477	A_32_P117127	ODZ3	odz, odd Oz/ten-m homolog 3 (Drosophila)	9.99548e-10	0.20366	-4.91015
NM_015238	A_23_P81392	WWC1	WW and C2 domain containing 1	2.66447e-09	0.328886	-3.04057
NM_001389	A_23_P211141	DSCAM	Down syndrome cell adhesion molecule	7.36019e-09	0.130879	-7.64064
NM_001080394	A_24_P143686	KIAA0146	KIAA0146	1.40616e-09	0.123172	-8.11873
NM_001080432	A_23_P113184	FTO	fat mass and obesity associated	3.99225e-09	0.148992	-6.71179
NM_005028	A_24_P673786	PIP4K2A	phosphatidylinositol-5-phosphate 4-kinase, type II, alpha	4.30878e-09	0.204294	-4.89491
NM_020343	A_24_P601695	RALGAPA2	Ral GTPase activating protein, alpha subunit 2 (catalytic)	6.53857e-09	0.264779	-3.77673
NM_005647	A_24_P417162	TBL1X	transducin (beta)-like 1X-linked	4.47914e-09	0.148515	-6.73334
NM_001332	A_24_P380196	CTNND2	catenin (cadherin-associated protein), delta 2 (neural plakophilin-related arm-repeat protein)	8.41803e-09	0.0362402	-27.5937
NM_007051	A_23_P96853	FAF1	Fas (TNFRSF6) associated factor 1	5.8685e-09	0.0735478	-13.5966
NM_001392	A_23_P208158	DTNA	dystrobrevin, alpha	3.39383e-09	0.140093	-7.13812
NM_001924	A_23_P23221	GADD45A	growth arrest and DNA-damage-inducible, alpha	1.57215e-08	16.7966	16.7966
ENST00000294485	A_24_P68008	C1orf187	chromosome 1 open reading frame 187	3.20363e-09	73.6323	73.6323
NM_015556	A_24_P344053	SIPA1L1	signal-induced proliferation-associated 1 like 1	1.48533e-08	0.147034	-6.80114
NM_004429	A_24_P365807	EFNB1	ephrin-B1	7.36658e-09	10.7839	10.7839
NM_003760	A_24_P383850	EIF4G3	eukaryotic translation initiation factor 4 gamma, 3	6.45685e-09	0.269342	-3.71275
NM_000292	A_23_P159671	PHKA2	phosphorylase kinase, alpha 2 (liver)	1.92342e-08	0.419264	-2.38513
NR_028502	A_24_P253723	MIR22HG	MIR22 host gene (non-protein coding)	6.72565e-08	4.47593	4.47593
NM_182755	A_23_P161156	ZNF438	zinc finger protein 438	5.01092e-08	0.192715	-5.189
NM_014214	A_23_P50081	IMPA2	inositol(myo)-1(or 4)-monophosphatase 2	2.75578e-08	0.32122	-3.11313
NM_178040	A_24_P694760	ERC1	ELKS/RAB6-interacting/CAST family member 1	9.06028e-08	0.230079	-4.34634
NM_005544	A_24_P802145	IRS1	insulin receptor substrate 1	1.45599e-07	0.217905	-4.58915
NM_014301	A_23_P340158	ISCU	iron-sulfur cluster scaffold homolog (E. coli)	4.68725e-08	3.31039	3.31039
NM_018413	A_32_P99171	CHST11	carbohydrate (chondroitin 4) sulfotransferase 11	7.91572e-08	0.147363	-6.78596
NM_145206	A_32_P36313	VTI1A	vesicle transport through interaction with t-SNAREs homolog 1A (yeast)	1.9544e-08	0.175124	-5.71023
NM_005400	A_23_P348194	PRKCE	protein kinase C, epsilon	7.34141e-07	0.273142	-3.6611
NM_033284	A_23_P114466	TBL1Y	transducin (beta)-like 1, Y-linked	6.38747e-08	0.170954	-5.84954
NM_018660	A_24_P153680	ZNF395	zinc finger protein 395	5.429e-07	0.480431	-2.08147
NM_003805	A_32_P29806	CRADD	CASP2 and RIPK1 domain containing adaptor with death domain	2.92059e-08	0.316494	-3.15962
NM_032812	A_23_P161424	PLXDC2	plexin domain containing 2	1.13289e-08	0.0779812	-12.8236
NM_014390	A_23_P42829	SND1	staphylococcal nuclease and tudor domain containing 1	4.67501e-08	0.102738	-9.73349
NM_018719	A_24_P274795	CDCA7L	cell division cycle associated 7-like	3.50108e-08	0.125891	-7.94336
NM_002841	A_23_P41054	PTPRG	protein tyrosine phosphatase, receptor type, G	3.39506e-08	0.1324	-7.55288
NM_004899	A_32_P132796	BRE	brain and reproductive organ-expressed (TNFRSF1A modulator)	5.38317e-08	0.133839	-7.47165
NM_014216	A_24_P167683	ITPK1	inositol-tetrakisphosphate 1-kinase	1.64076e-07	0.248371	-4.02624
NM_133330	A_24_P2463	WHSC1	Wolf-Hirschhorn syndrome candidate 1	7.35191e-08	0.261296	-3.82708
NM_002074	A_24_P71021	GNB1	guanine nucleotide binding protein (G protein), beta polypeptide 1	5.87542e-08	0.470436	-2.12569
NM_000593	A_23_P59005	TAP1	transporter 1, ATP-binding cassette, sub-family B (MDR/TAP)	2.78974e-08	5.10543	5.10543
NM_019089	A_23_P304716	HES2	hairy and enhancer of split 2 (Drosophila)	3.39647e-08	15.8433	15.8433
NM_001962	A_24_P645914	EFNA5	ephrin-A5	3.44638e-07	0.229183	-4.36332
NM_006255	A_23_P205567	PRKCH	protein kinase C, eta	5.24182e-08	0.291805	-3.42695
NM_018034	A_23_P30474	WDR70	WD repeat domain 70	5.07561e-08	0.180324	-5.54557
A_24_P126851	?	?	?	2.74567e-07	0.421062	-2.37495
A_32_P140501	?	?	?	5.62522e-07	6.01388	6.01388
NM_022071	A_23_P169003	SH2D4A	SH2 domain containing 4A	9.6484e-08	0.417623	-2.3945
NM_206943	A_23_P43810	LTBP1	latent transforming growth factor beta binding protein 1	1.69454e-07	0.20898	-4.78515
NM_025185	A_24_P942068	TANC2	tetratricopeptide repeat, ankyrin repeat and coiled-coil containing 2	1.3116e-07	0.133689	-7.48003
NM_021807	A_23_P135437	EXOC4	exocyst complex component 4	6.48991e-08	0.0463379	-21.5806
NM_020722	A_24_P331882	KIAA1211	KIAA1211	4.63424e-07	0.216774	-4.61309
NM_016108	A_23_P93431	AIG1	androgen-induced 1	3.94294e-08	0.191608	-5.21899
NM_001018115	A_32_P24165	FANCD2	Fanconi anemia, complementation group D2	7.24556e-08	0.275515	-3.62957
NM_001080467	A_23_P101193	MYO5B	myosin VB	1.00706e-07	0.289369	-3.45579
NM_001903	A_24_P80633	CTNNA1	catenin (cadherin-associated protein), alpha 1, 102kDa	8.16504e-08	0.322544	-3.10035
NM_018319	A_23_P117623	TDP1	tyrosyl-DNA phosphodiesterase 1	1.72075e-07	0.371723	-2.69017
NM_015194	A_24_P119609	MYO1D	myosin ID	2.45709e-07	0.220172	-4.5419
NM_000389	A_23_P59210	CDKN1A	cyclin-dependent kinase inhibitor 1A (p21, Cip1)	6.86873e-08	8.5463	8.5463
NM_001003408	A_23_P202520	ABLIM1	actin binding LIM protein 1	8.99927e-08	0.459294	-2.17725
NM_021116	A_24_P577694	ADCY1	adenylate cyclase 1 (brain)	3.07712e-07	0.198685	-5.03309
NM_203401	A_23_P200866	STMN1	stathmin 1	5.17643e-08	0.348485	-2.86957
NM_001042368	A_23_P135190	RALGDS	ral guanine nucleotide dissociation stimulator	1.35125e-08	3.29903	3.29903
NM_016373	A_23_P83368	WWOX	WW domain containing oxidoreductase	1.4772e-07	0.0804668	-12.4275
NM_006779	A_23_P1602	CDC42EP2	CDC42 effector protein (Rho GTPase binding) 2	1.40357e-05	0.460117	-2.17336
NM_031482	A_24_P370471	ATG10	ATG10 autophagy related 10 homolog (S. cerevisiae)	1.26829e-07	0.225797	-4.42875
NM_004628	A_24_P88921	XPC	xeroderma pigmentosum, complementation group C	6.3908e-08	3.38736	3.38736
NM_003920	A_24_P231004	TIMELESS	timeless homolog (Drosophila)	2.76809e-07	0.488806	-2.0458
NR_024443	A_24_P392496	LOC100133920	uncharacterized LOC100133920	1.44455e-07	0.191628	-5.21845
NM_199168	A_23_P202448	CXCL12	chemokine (C-X-C motif) ligand 12	1.4517e-07	0.0700297	-14.2797
NM_001080450	A_23_P359854	BEND3	BEN domain containing 3	7.75631e-07	0.232774	-4.29601
NM_020689	A_24_P67350	SLC24A3	solute carrier family 24 (sodium/potassium/calcium exchanger), member 3	2.2565e-07	0.0443821	-22.5316
NM_012446	A_23_P33791	SSBP2	single-stranded DNA binding protein 2	4.01118e-08	0.118702	-8.42447
NM_000411	A_23_P304991	HLCS	holocarboxylase synthetase (biotin-(proprionyl-CoA-carboxylase (ATP-hydrolysing)) ligase)	1.69227e-07	0.207527	-4.81864
NM_007174	A_23_P420551	CIT	citron (rho-interacting, serine/threonine kinase 21)	3.76277e-07	0.138612	-7.21439
NM_017653	A_23_P66924	DYM	dymeclin	8.5558e-08	0.149983	-6.66741
NM_013376	A_23_P218463	SERTAD1	SERTA domain containing 1	1.02496e-06	4.22426	4.22426
NM_004881	A_23_P5392	TP53I3	tumor protein p53 inducible protein 3	1.15772e-07	16.416	16.416
NM_025074	A_32_P107876	FRAS1	Fraser syndrome 1	2.80036e-07	0.0470692	-21.2453
NM_018291	A_32_P209094	FGGY	FGGY carbohydrate kinase domain containing	1.92364e-07	0.087291	-11.4559
NM_022065	A_23_P108376	THADA	thyroid adenoma associated	2.72397e-07	0.276114	-3.62169
NR_046228	?	?	?	2.31315e-07	6.42197	6.42197
NM_198828	A_24_P84340	MAST4	microtubule associated serine/threonine kinase family member 4	3.57407e-07	0.150183	-6.65853
NM_004737	A_23_P91697	LARGE	like-glycosyltransferase	3.29859e-07	0.0567049	-17.6352
NM_004726	A_32_P100109	REPS2	RALBP1 associated Eps domain containing 2	7.34629e-07	0.375023	-2.6665
NM_017794	A_24_P367571	KIAA1797	KIAA1797	1.82956e-07	0.173458	-5.76508
NM_152653	A_32_P155506	UBE2E2	ubiquitin-conjugating enzyme E2E 2	1.86225e-07	0.143244	-6.98108
NM_006738	A_24_P164337	AKAP13	A kinase (PRKA) anchor protein 13	9.10626e-07	0.319269	-3.13216
NM_025139	A_23_P209735	ARMC9	armadillo repeat containing 9	4.02562e-07	0.254077	-3.93581
NM_004110	A_23_P38154	FDXR	ferredoxin reductase	1.39783e-07	6.40427	6.40427
NR_027257	A_32_P215100	FLJ26850	FLJ26850 protein	7.77215e-08	44.1178	44.1178
NM_018706	A_24_P722216	DHTKD1	dehydrogenase E1 and transketolase domain containing 1	2.95858e-07	0.317257	-3.15202
NM_018205	A_23_P72888	LRRC20	leucine rich repeat containing 20	6.14083e-07	0.156038	-6.40871
NM_000125	A_24_P383478	ESR1	estrogen receptor 1	1.39987e-07	0.0324898	-30.7789
NR_045484	A_32_P703	LOC646626	uncharacterized LOC646626	8.12887e-07	4.73887	4.73887
NM_032603	A_24_P88763	LOXL3	lysyl oxidase-like 3	7.90649e-07	0.318562	-3.13911
NM_018975	A_23_P129704	TERF2IP	telomeric repeat binding factor 2, interacting protein	1.70335e-07	2.12447	2.12447
NM_001206998	A_24_P162373	ZNRF3	zinc and ring finger 3	9.99522e-06	0.386291	-2.58872
NM_020863	A_32_P109922	ZFAT	zinc finger and AT hook domain containing	1.57489e-06	0.280149	-3.56953
NM_015277	A_24_P108311	NEDD4L	neural precursor cell expressed, developmentally down-regulated 4-like	7.3789e-07	0.205828	-4.85842
NM_130808	A_23_P327551	CPNE4	copine IV	1.58449e-07	0.0712898	-14.0272
AK022045	?	?	?	1.82869e-06	20.5261	20.5261
NM_025217	A_24_P149314	ULBP2	UL16 binding protein 2	2.45697e-07	4.20019	4.20019
NR_038453	A_32_P52153	LOC728978	uncharacterized LOC728978	2.3152e-07	45.0616	45.0616
NM_133334	A_23_P7301	WHSC1	Wolf-Hirschhorn syndrome candidate 1	3.03229e-07	0.221038	-4.52411
NM_001145340	?	?	?	3.80594e-06	8.90443	8.90443
NM_001789	A_24_P397107	CDC25A	cell division cycle 25 homolog A (S. pombe)	9.15615e-06	0.397514	-2.51564
NM_007118	A_24_P42603	TRIO	triple functional domain (PTPRF interacting)	1.11409e-06	0.264947	-3.77435
A_24_P627678	?	?	?	2.47714e-07	0.472166	-2.1179
NM_001012267	A_32_P119174	CENPP	centromere protein P	2.0114e-07	0.349308	-2.86281
NM_004091	A_23_P408955	E2F2	E2F transcription factor 2	1.90457e-06	0.236038	-4.23661
M12623	A_32_P1381	HMGN2	high mobility group nucleosomal binding domain 2	2.9584e-07	0.462481	-2.16225
NM_000633	A_23_P352266	BCL2	B-cell CLL/lymphoma 2	9.4587e-07	0.294363	-3.39716
NM_032360	A_23_P52127	ACBD6	acyl-CoA binding domain containing 6	2.99558e-07	0.304687	-3.28206
NM_002875	A_23_P88731	RAD51	RAD51 homolog (S. cerevisiae)	7.39131e-07	0.252186	-3.96533
NM_017784	A_24_P117902	OSBPL10	oxysterol binding protein-like 10	9.27436e-07	0.2823	-3.54233
A_32_P148407	?	?	?	2.00378e-06	0.310651	-3.21905
NM_001010854	A_24_P127292	TTC7B	tetratricopeptide repeat domain 7B	1.64304e-06	0.143596	-6.96399
NM_013238	A_23_P117190	DNAJC15	DnaJ (Hsp40) homolog, subfamily C, member 15	4.56936e-08	0.450601	-2.21926
A_32_P182135	?	?	?	1.37745e-06	0.137568	-7.26912
NM_033285	A_23_P168882	TP53INP1	tumor protein p53 inducible nuclear protein 1	8.36983e-07	8.50983	8.50983
NM_014974	A_24_P360722	DIP2C	DIP2 disco-interacting protein 2 homolog C (Drosophila)	9.95964e-07	0.308637	-3.24005
NM_014636	A_32_P221991	RALGPS1	Ral GEF with PH domain and SH3 binding motif 1	1.14539e-06	0.321042	-3.11486
NM_001286050	?	?	?	1.26646e-06	0.349181	-2.86384
NM_024829	A_23_P87709	PLBD1	phospholipase B domain containing 1	2.32677e-07	0.434974	-2.29899
NM_001822	A_23_P79482	CHN1	chimerin (chimaerin) 1	1.37158e-07	0.171783	-5.82128
NM_017679	A_24_P100761	BCAS3	breast carcinoma amplified sequence 3	7.31755e-07	0.22239	-4.4966
NM_005072	A_23_P389391	SLC12A4	solute carrier family 12 (potassium/chloride transporters), member 4	7.38863e-08	19.1016	19.1016
NM_015653	A_23_P166526	RIBC2	RIB43A domain with coiled-coils 2	2.87244e-06	0.249018	-4.01578
THC2717907	A_32_P222571			3.21176e-06	2.68955	2.68955
NM_052893	A_32_P94722	BTBD9	BTB (POZ) domain containing 9	1.45403e-06	0.180158	-5.55068
NM_004528	A_23_P51548	MGST3	microsomal glutathione S-transferase 3	6.9516e-07	0.477719	-2.09328
NM_001195278	A_32_P70245	LOC100507421	transmembrane protein 178-like	4.58254e-07	0.208578	-4.79438
NM_000043	A_23_P63896	FAS	Fas (TNF receptor superfamily, member 6)	2.18494e-06	11.134	11.134
NM_031965	A_23_P66732	GSG2	germ cell associated 2 (haspin)	8.27643e-06	0.316702	-3.15755
NM_015651	A_23_P21436	PHF19	PHD finger protein 19	1.38386e-06	0.268856	-3.71947
NM_001712	A_24_P382319	CEACAM1	carcinoembryonic antigen-related cell adhesion molecule 1 (biliary glycoprotein)	1.4286e-07	47.6082	47.6082
NM_153607	A_23_P404606	C5orf41	chromosome 5 open reading frame 41	8.86351e-07	6.84293	6.84293
NM_014476	A_23_P110403	PDLIM3	PDZ and LIM domain 3	1.13136e-06	0.196821	-5.08076
NM_001145044	A_23_P61623	SLCO3A1	solute carrier organic anion transporter family, member 3A1	2.63759e-06	0.230465	-4.33905
NM_024757	A_23_P217120	EHMT1	euchromatic histone-lysine N-methyltransferase 1	1.76906e-06	0.355823	-2.81038
AK024898	A_32_P170664			7.69134e-07	5.46934	5.46934
NM_001009936	A_23_P401904	PHF19	PHD finger protein 19	7.3964e-07	0.279064	-3.58341
NM_003310	A_23_P256773	TSSC1	tumor suppressing subtransferable candidate 1	6.79149e-07	0.353962	-2.82516
NM_000952	A_24_P102821	PTAFR	platelet-activating factor receptor	1.35916e-07	12.8757	12.8757
NM_013282	A_32_P101235	UHRF1	ubiquitin-like with PHD and ring finger domains 1	2.45619e-06	0.226669	-4.41173
NM_002507	A_23_P389897	NGFR	nerve growth factor receptor	3.87757e-07	33.5722	33.5722
A_24_P316767	?	?	?	7.94724e-07	0.476616	-2.09812
NM_014865	A_23_P25293	NCAPD2	non-SMC condensin I complex, subunit D2	1.12066e-06	0.313796	-3.18678
NM_012309	A_23_P334883	SHANK2	SH3 and multiple ankyrin repeat domains 2	1.96981e-05	0.231434	-4.32089
NM_152259	A_32_P109296	C15orf42	chromosome 15 open reading frame 42	2.48998e-05	0.26135	-3.82628
NM_032756	A_23_P74449	HPDL	4-hydroxyphenylpyruvate dioxygenase-like	6.14602e-06	0.401829	-2.48862
NM_022457	A_23_P92292	RFWD2	ring finger and WD repeat domain 2	3.44361e-07	0.283771	-3.52397
NM_031466	A_23_P73420	TRAPPC9	trafficking protein particle complex 9	1.05351e-06	0.12244	-8.16729
NM_030613	A_23_P133359	ZFP2	zinc finger protein 2 homolog (mouse)	2.83987e-06	3.50401	3.50401
NM_024820	A_23_P43557	DENND1A	DENN/MADD domain containing 1A	8.12546e-07	0.139272	-7.1802
NM_020381	A_23_P134167	PDSS2	prenyl (decaprenyl) diphosphate synthase, subunit 2	3.98877e-07	0.130105	-7.68607
NM_002615	A_23_P100660	SERPINF1	serpin peptidase inhibitor, clade F (alpha-2 antiplasmin, pigment epithelium derived factor), member 1	4.67804e-07	16.8702	16.8702
NM_004853	A_23_P146908	STX8	syntaxin 8	9.82823e-07	0.17646	-5.66699
ENST00000583775	?	?	?	2.31595e-05	6.00659	6.00659
NM_001003395	A_23_P31143	TPD52L1	tumor protein D52-like 1	4.13487e-07	0.168159	-5.94674
NM_022743	A_32_P103291	SMYD3	SET and MYND domain containing 3	7.65851e-07	0.0925506	-10.8049
NM_017749	A_23_P353742	AMBRA1	autophagy/beclin-1 regulator 1	2.22109e-05	0.481905	-2.0751
NM_015476	A_24_P128140	C18orf10	chromosome 18 open reading frame 10	1.48651e-06	0.480395	-2.08162
NM_170711	A_23_P165247	DAZAP1	DAZ associated protein 1	3.01927e-06	0.394337	-2.5359
NM_032730	A_23_P122775	RTN4IP1	reticulon 4 interacting protein 1	7.45308e-07	0.355042	-2.81657
NM_181789	A_24_P49199	GLDN	gliomedin	3.95962e-07	0.233204	-4.28809
ENST00000344135	A_24_P913431	TRIO	triple functional domain (PTPRF interacting)	5.77319e-06	0.252249	-3.96434
THC2526647	A_32_P70491			1.0961e-06	0.306224	-3.26558
NM_018250	A_23_P8848	INTS9	integrator complex subunit 9	5.17045e-06	0.434341	-2.30234
NM_001267536	?	?	?	3.96434e-05	2.14663	2.14663
NM_033342	A_24_P286190	TRIM7	tripartite motif containing 7	2.24718e-06	0.302887	-3.30156
NM_138419	A_23_P253752	FAM54A	family with sequence similarity 54, member A	8.37132e-07	0.32711	-3.05708
NM_023925	A_24_P400675	CAPRIN2	caprin family member 2	2.05286e-05	2.02152	2.02152
NM_003542	A_23_P214487	HIST1H4C	histone cluster 1, H4c	1.25101e-06	0.149505	-6.68873
NM_023039	A_24_P337397	ANKRA2	ankyrin repeat, family A (RFXANK-like), 2	2.28027e-06	8.50544	8.50544
THC2780391	A_32_P226801			6.87245e-07	0.24461	-4.08815
NM_020632	A_23_P215111	ATP6V0A4	ATPase, H+ transporting, lysosomal V0 subunit a4	1.97314e-06	0.136938	-7.30255
NM_019040	A_23_P24623	ELP4	elongation protein 4 homolog (S. cerevisiae)	5.48147e-07	0.199721	-5.00698
NM_080820	A_23_P17512	DTD1	D-tyrosyl-tRNA deacylase 1 homolog (S. cerevisiae)	1.11488e-06	0.32803	-3.0485
NM_012176	A_24_P171873	FBXO4	F-box protein 4	4.17943e-07	0.409505	-2.44197
NM_019894	A_23_P127608	TMPRSS4	transmembrane protease, serine 4	1.21663e-06	0.253177	-3.94981
NM_001080480	A_23_P408996	MBOAT1	membrane bound O-acyltransferase domain containing 1	5.88076e-06	0.34406	-2.90647
NM_015285	A_23_P164528	WDR7	WD repeat domain 7	3.31854e-07	0.275763	-3.6263
AK125979	A_24_P410797	KALRN	kalirin, RhoGEF kinase	2.63446e-06	0.241008	-4.14925
NM_005766	A_23_P308763	FARP1	FERM, RhoGEF (ARHGEF) and pleckstrin domain protein 1 (chondrocyte-derived)	3.81694e-06	0.10822	-9.24045
NM_022774	A_23_P193	DEM1	defects in morphology 1 homolog (S. cerevisiae)	4.87161e-07	2.36695	2.36695
NM_016243	A_23_P52101	CYB5R1	cytochrome b5 reductase 1	8.54853e-07	2.14023	2.14023
NM_002388	A_23_P7873	MCM3	minichromosome maintenance complex component 3	2.39915e-06	0.367997	-2.71741
NM_001001556	A_23_P48807	GALK2	galactokinase 2	3.24765e-07	0.313642	-3.18835
NM_016733	A_23_P211445	LIMK2	LIM domain kinase 2	2.83858e-07	6.31028	6.31028
NM_004701	A_23_P65757	CCNB2	cyclin B2	7.90093e-07	0.375122	-2.6658
NM_020761	A_23_P384499	RPTOR	regulatory associated protein of MTOR, complex 1	3.94244e-06	0.150572	-6.64134
NM_173462	A_24_P403928	PAPLN	papilin, proteoglycan-like sulfated glycoprotein	3.45722e-06	2.45743	2.45743
NM_020132	A_24_P344711	AGPAT3	1-acylglycerol-3-phosphate O-acyltransferase 3	3.61492e-06	0.459567	-2.17596
NM_004526	A_32_P103633	MCM2	minichromosome maintenance complex component 2	1.41529e-06	0.249925	-4.0012
NM_006404	A_23_P80040	PROCR	protein C receptor, endothelial	6.88395e-07	19.3511	19.3511
NM_183360	A_23_P210319	DTNB	dystrobrevin, beta	2.51535e-06	0.16474	-6.07018
NM_015198	A_32_P86173	COBL	cordon-bleu homolog (mouse)	2.92534e-06	0.249826	-4.00279
NM_032167	A_32_P66020	SNX29	sorting nexin 29	1.7949e-05	0.416896	-2.39868
A_24_P229903	?	?	?	1.22173e-06	0.3243	-3.08357
NM_001500	A_23_P72068	GMDS	GDP-mannose 4,6-dehydratase	1.99356e-06	0.0844279	-11.8444
NM_016819	A_24_P414183	OGG1	8-oxoguanine DNA glycosylase	4.94902e-06	0.473608	-2.11145
ENST00000416191	?	?	?	3.89e-06	8.2561	8.2561
NM_001271667	?	?	?	8.03922e-06	0.499434	-2.00227
NM_004799	A_32_P143048	ZFYVE9	zinc finger, FYVE domain containing 9	1.452e-06	0.380703	-2.62672
NM_022445	A_23_P145957	TPK1	thiamin pyrophosphokinase 1	1.45195e-06	0.138739	-7.20777
NM_031407	A_24_P932016	HUWE1	HECT, UBA and WWE domain containing 1	1.77415e-06	0.374786	-2.66819
NM_013272	A_24_P588897	SLCO3A1	solute carrier organic anion transporter family, member 3A1	2.20506e-06	0.212633	-4.70294
NM_018302	A_23_P29975	C4orf19	chromosome 4 open reading frame 19	1.16366e-06	0.249133	-4.01392
NM_020762	A_23_P162449	SRGAP1	SLIT-ROBO Rho GTPase activating protein 1	8.86379e-06	0.183625	-5.44587
NM_181698	A_23_P434421	CCNY	cyclin Y	1.80112e-06	0.235336	-4.24925
NM_003504	A_23_P57379	CDC45	cell division cycle 45 homolog (S. cerevisiae)	1.68842e-06	0.252345	-3.96284
A_32_P99804	?	?	?	2.2518e-06	7.3473	7.3473
NM_203447	A_32_P181077	DOCK8	dedicator of cytokinesis 8	5.39558e-06	0.32232	-3.1025
NM_130436	A_24_P62169	DYRK1A	dual-specificity tyrosine-(Y)-phosphorylation regulated kinase 1A	1.44365e-05	0.389045	-2.57039
NM_021943	A_24_P186414	ZFAND3	zinc finger, AN1-type domain 3	5.21964e-06	0.228446	-4.37741
NM_004117	A_24_P38081	FKBP5	FK506 binding protein 5	1.10486e-06	0.317553	-3.14908
NM_020371	A_23_P100074	AVEN	apoptosis, caspase activation inhibitor	2.97281e-06	0.35851	-2.78933
NR_001555	A_24_P314554	GOLGA2P2Y	golgin A2 pseudogene 2, Y-linked	1.39656e-05	2.74013	2.74013
NM_020806	A_23_P88141	GPHN	gephyrin	5.94073e-07	0.13551	-7.37952
THC2670421	A_32_P181548			5.3765e-06	4.11686	4.11686
NM_022117	A_23_P170608	TSPYL2	TSPY-like 2	5.51206e-07	3.84767	3.84767
NM_019891	A_23_P97218	ERO1LB	ERO1-like beta (S. cerevisiae)	3.62832e-06	3.58159	3.58159
NM_001144956	A_32_P212471	RIIAD1	regulatory subunit of type II PKA R-subunit (RIIa) domain containing 1	1.50093e-06	9.89201	9.89201
NM_015909	A_23_P90752	NBAS	neuroblastoma amplified sequence	8.99907e-07	0.173297	-5.77045
NM_024817	A_24_P5153	THSD4	thrombospondin, type I, domain containing 4	1.13268e-05	0.260467	-3.83926
NM_021127	A_23_P207999	PMAIP1	phorbol-12-myristate-13-acetate-induced protein 1	1.39622e-05	5.98884	5.98884
AK023542	A_24_P273423			0.0003639	5.32385	5.32385
NM_001218	A_24_P330518	CA12	carbonic anhydrase XII	2.08771e-06	0.18567	-5.38591
NM_181671	A_23_P84189	PITPNC1	phosphatidylinositol transfer protein, cytoplasmic 1	3.14375e-06	0.283854	-3.52294
NM_003869	A_24_P13790	CES2	carboxylesterase 2	4.95754e-07	5.76852	5.76852
NM_078467	A_24_P89457	CDKN1A	cyclin-dependent kinase inhibitor 1A (p21, Cip1)	1.18957e-06	9.552	9.552
NM_012393	A_23_P402610	PFAS	phosphoribosylformylglycinamidine synthase	8.71528e-06	0.305357	-3.27486
ENST00000565617	?	?	?	9.50393e-06	12.1912	12.1912
THC2533385	A_32_P94801			3.74433e-05	8.64652	8.64652
NM_020394	A_24_P254705	ZNF695	zinc finger protein 695	4.80016e-06	0.313226	-3.19258
NM_015440	A_32_P135243	MTHFD1L	methylenetetrahydrofolate dehydrogenase (NADP+ dependent) 1-like	2.84546e-06	0.363735	-2.74925
NM_020700	A_23_P391443	PPM1H	protein phosphatase, Mg2+/Mn2+ dependent, 1H	2.56262e-06	0.217688	-4.59373
BC051317	A_23_P54781	RBBP6	retinoblastoma binding protein 6	0.000506478	3.2524	3.2524
NM_012331	A_32_P138359	MSRA	methionine sulfoxide reductase A	5.5968e-06	0.200212	-4.99471
NM_005956	A_23_P117494	MTHFD1	methylenetetrahydrofolate dehydrogenase (NADP+ dependent) 1, methenyltetrahydrofolate cyclohydrolase, formyltetrahydrofolate synthetase	1.45159e-06	0.237797	-4.20527
NM_001101376	A_24_P847326	FAM183A	family with sequence similarity 183, member A	1.59343e-06	5.00547	5.00547
NM_000127	A_23_P43273	EXT1	exostosin 1	1.02811e-05	0.3123	-3.20204
NM_012080	A_23_P254842	HDHD1	haloacid dehalogenase-like hydrolase domain containing 1	2.16648e-06	0.418844	-2.38753
NM_145793	A_32_P59549	GFRA1	GDNF family receptor alpha 1	1.34643e-06	0.111134	-8.99816
NM_014035	A_23_P19095	SNX24	sorting nexin 24	1.12564e-06	0.298197	-3.35348
NM_020870	A_24_P418762	SH3RF1	SH3 domain containing ring finger 1	2.98803e-05	0.400517	-2.49677
NM_015541	A_23_P109636	LRIG1	leucine-rich repeats and immunoglobulin-like domains 1	1.69865e-05	0.350009	-2.85707
AK096804	A_24_P237559	LNPEP	leucyl/cystinyl aminopeptidase	1.07375e-05	3.47296	3.47296
NM_001017923	A_24_P33048	C14orf28	chromosome 14 open reading frame 28	8.62148e-06	2.04666	2.04666
A_32_P106864	?	?	?	6.5591e-05	0.395665	-2.52739
NM_004934	A_23_P84118	CDH18	cadherin 18, type 2	1.00835e-06	0.106255	-9.4113
A_32_P85230	?	?	?	7.34816e-08	3.054	3.054
NM_015254	A_32_P165611	KIF13B	kinesin family member 13B	1.01319e-05	0.262176	-3.81423
A_24_P489639	?	?	?	1.42781e-06	0.302383	-3.30707
NM_002582	A_32_P133244	PARN	poly(A)-specific ribonuclease	6.44107e-07	0.356047	-2.80862
NM_003045	A_24_P253251	SLC7A1	solute carrier family 7 (cationic amino acid transporter, y+ system), member 1	1.36808e-05	0.441837	-2.26328
NM_152540	A_23_P92543	SCFD2	sec1 family domain containing 2	1.62058e-06	0.086985	-11.4962
NM_018124	A_24_P287826	RFWD3	ring finger and WD repeat domain 3	1.49916e-05	0.454562	-2.19992
NM_005244	A_23_P500421	EYA2	eyes absent homolog 2 (Drosophila)	4.62954e-06	0.171222	-5.84036
NM_016835	A_24_P224488	MAPT	microtubule-associated protein tau	1.41703e-05	0.25808	-3.87477
NM_144576	A_23_P354798	COQ10A	coenzyme Q10 homolog A (S. cerevisiae)	1.60384e-06	3.13465	3.13465
NM_000947	A_24_P282237	PRIM2	primase, DNA, polypeptide 2 (58kDa)	2.63359e-06	0.170597	-5.86176
NM_198686	A_24_P193295	RAB15	RAB15, member RAS onocogene family	8.63393e-06	0.49149	-2.03463
ENST00000375180	?	?	?	6.89639e-06	0.413537	-2.41816
NM_002886	A_24_P123052	RAP2B	RAP2B, member of RAS oncogene family	6.59796e-06	3.42645	3.42645
NM_013248	A_23_P251695	NXT1	NTF2-like export factor 1	7.03064e-06	0.455314	-2.19629
NM_018434	A_23_P41734	RNF130	ring finger protein 130	4.5637e-06	0.423607	-2.36068
NM_001797	A_23_P152305	CDH11	cadherin 11, type 2, OB-cadherin (osteoblast)	1.56045e-06	0.0987597	-10.1256
NM_181521	A_32_P84009	CMTM4	CKLF-like MARVEL transmembrane domain containing 4	2.62814e-06	0.451188	-2.21637
ENST00000602332	?	?	?	8.32856e-07	12.6718	12.6718
THC2718727	A_32_P190864			1.22531e-05	0.229648	-4.3545
NM_173075	A_23_P10701	APBB2	amyloid beta (A4) precursor protein-binding, family B, member 2	2.88349e-06	0.18455	-5.41859
NM_006253	A_23_P204503	PRKAB1	protein kinase, AMP-activated, beta 1 non-catalytic subunit	1.00741e-06	3.79038	3.79038
NM_024734	A_32_P167471	CLMN	calmin (calponin-like, transmembrane)	3.37314e-06	0.431853	-2.3156
NM_144675	A_23_P368251	GSG1L	GSG1-like	7.10774e-06	0.107405	-9.31059
NM_003213	A_23_P94795	TEAD4	TEA domain family member 4	2.82225e-05	0.4467	-2.23864
THC2552359	A_32_P186710			2.29978e-06	3.37031	3.37031
NM_005879	A_23_P170491	TRAIP	TRAF interacting protein	1.91776e-05	0.428983	-2.33109
NM_003074	A_32_P112104	SMARCC1	SWI/SNF related, matrix associated, actin dependent regulator of chromatin, subfamily c, member 1	8.09449e-07	0.430462	-2.32309
NM_182776	A_23_P93690	MCM7	minichromosome maintenance complex component 7	1.86473e-06	0.338204	-2.95679
NM_032227	A_24_P6294	TMEM164	transmembrane protein 164	4.8274e-06	0.261411	-3.82539
BI497361	A_32_P220161			8.16083e-05	6.82608	6.82608
NM_181773	A_32_P347617	APOBEC3H	apolipoprotein B mRNA editing enzyme, catalytic polypeptide-like 3H	5.70238e-07	6.23996	6.23996
NM_003258	A_23_P107421	TK1	thymidine kinase 1, soluble	4.30555e-06	0.319163	-3.13319
ENST00000415212	A_32_P108554			8.54209e-06	2.86329	2.86329
NM_032918	A_24_P321525	RERG	RAS-like, estrogen-regulated, growth inhibitor	1.43151e-06	0.225314	-4.43826
NM_005399	A_24_P917711	PRKAB2	protein kinase, AMP-activated, beta 2 non-catalytic subunit	1.5384e-05	2.24074	2.24074
NM_033010	A_23_P166807	PCBP4	poly(rC) binding protein 4	9.49318e-07	3.43585	3.43585
NM_004333	A_23_P42935	BRAF	v-raf murine sarcoma viral oncogene homolog B1	7.75735e-06	0.341221	-2.93065
BC029857	?	?	?	0.000318827	0.28002	-3.57117
NM_002093	A_23_P251342	GSK3B	glycogen synthase kinase 3 beta	1.38199e-06	0.357742	-2.79531
NM_198428	A_23_P82351	BBS9	Bardet-Biedl syndrome 9	1.23594e-06	0.158914	-6.2927
NM_012429	A_23_P17811	SEC14L2	SEC14-like 2 (S. cerevisiae)	1.56223e-06	3.28225	3.28225
NM_004097	A_23_P315122	EMX1	empty spiracles homeobox 1	6.21227e-07	6.60217	6.60217
AF527552	A_32_P103771	BAGE	B melanoma antigen	1.69794e-06	0.338069	-2.95798
NM_024560	A_23_P339119	ACSS3	acyl-CoA synthetase short-chain family member 3	1.01469e-06	0.238461	-4.19356
NM_175850	A_23_P28953	DNMT3B	DNA (cytosine-5-)-methyltransferase 3 beta	2.2297e-05	0.372295	-2.68604
NM_133374	A_24_P743806	ZNF618	zinc finger protein 618	1.68119e-05	0.267427	-3.73934
NM_003369	A_23_P33482	UVRAG	UV radiation resistance associated gene	3.99019e-06	0.232944	-4.29287
NM_014744	A_24_P289029	TBC1D5	TBC1 domain family, member 5	1.18947e-06	0.0856543	-11.6748
ENST00000424345	?	?	?	5.74042e-06	17.4121	17.4121
NM_024572	A_23_P67847	GALNT14	UDP-N-acetyl-alpha-D-galactosamine:polypeptide N-acetylgalactosaminyltransferase 14 (GalNAc-T14)	5.34467e-06	0.169925	-5.88495
NM_001003676	A_23_P147605	C11orf49	chromosome 11 open reading frame 49	5.07404e-06	0.272469	-3.67014
NM_015061	A_23_P112201	KDM4C	lysine (K)-specific demethylase 4C	1.84123e-06	0.19124	-5.22904
NM_001912	A_23_P94533	CTSL1	cathepsin L1	9.64284e-06	2.07264	2.07264
NM_004073	A_23_P51646	PLK3	polo-like kinase 3	6.27273e-06	17.487	17.487
NM_001002876	A_24_P399888	CENPM	centromere protein M	6.73787e-06	0.256338	-3.90111
NM_002412	A_23_P104323	MGMT	O-6-methylguanine-DNA methyltransferase	2.97726e-06	0.220624	-4.53259
NM_033083	A_24_P941930	EAF1	ELL associated factor 1	1.19161e-06	2.11046	2.11046
NM_020233	A_23_P55127	C17orf48	chromosome 17 open reading frame 48	4.48857e-05	2.32989	2.32989
NM_014629	A_24_P283535	ARHGEF10	Rho guanine nucleotide exchange factor (GEF) 10	5.83929e-05	0.46887	-2.13279
NM_022772	A_23_P147822	EPS8L2	EPS8-like 2	1.05157e-06	6.44838	6.44838
NM_020946	A_32_P23854	DENND1A	DENN/MADD domain containing 1A	1.28529e-05	0.0990996	-10.0909
NM_025164	A_24_P347067	SIK3	SIK family kinase 3	5.50195e-05	0.373869	-2.67473
NM_014251	A_32_P157402	SLC25A13	solute carrier family 25, member 13 (citrin)	2.65397e-06	0.341139	-2.93135
A_23_P136013	?	?	?	0.000213556	2.68201	2.68201
NM_002585	A_32_P25397	PBX1	pre-B-cell leukemia homeobox 1	2.14976e-06	0.172286	-5.80432
NM_001329	A_24_P103922	CTBP2	C-terminal binding protein 2	2.42229e-06	0.339626	-2.94441
NM_001040716	A_23_P161647	PC	pyruvate carboxylase	1.79478e-05	0.413949	-2.41576
A_32_P224345	?	?	?	2.12625e-05	0.243794	-4.10183
NM_001135920	A_24_P306136	KIAA1432	KIAA1432	1.10899e-05	0.357963	-2.79358
NM_001009608	A_23_P364766	C20orf94	chromosome 20 open reading frame 94	1.08865e-06	0.43015	-2.32477
NM_001485	A_23_P131183	GBX2	gastrulation brain homeobox 2	4.15763e-06	6.33505	6.33505
NM_001914	A_23_P101208	CYB5A	cytochrome b5 type A (microsomal)	3.65049e-06	0.400379	-2.49764
NM_015482	A_23_P7882	SLC22A23	solute carrier family 22, member 23	0.000311904	0.440897	-2.2681
NR_102743	?	?	?	1.56217e-05	0.44224	-2.26122
NM_000735	A_24_P371782	CGA	glycoprotein hormones, alpha polypeptide	2.09838e-06	4.47973	4.47973
NM_145177	A_24_P378987	DHRSX	dehydrogenase/reductase (SDR family) X-linked	5.30888e-06	0.239219	-4.18026
NM_006763	A_23_P62901	BTG2	BTG family, member 2	3.59649e-05	5.01413	5.01413
NM_021738	A_23_P35349	SVIL	supervillin	7.13399e-06	0.226039	-4.42401
ENST00000371741	?	?	?	6.73058e-07	4.38489	4.38489
NM_198531	A_23_P10500	ATP9B	ATPase, class II, type 9B	3.87768e-05	0.440326	-2.27105
NM_020366	A_23_P88278	RPGRIP1	retinitis pigmentosa GTPase regulator interacting protein 1	1.97744e-06	3.5046	3.5046
ENST00000559672	?	?	?	4.17308e-06	0.267101	-3.7439
NM_005030	A_24_P313504	PLK1	polo-like kinase 1	8.02787e-06	0.185939	-5.37811
NR_120613	?	?	?	5.80326e-05	0.421858	-2.37046
NM_000484	A_24_P314159	APP	amyloid beta (A4) precursor protein	2.22396e-06	0.192427	-5.19679
BC020539	A_24_P922684			0.000199763	3.30166	3.30166
NM_014279	A_24_P406601	OLFM1	olfactomedin 1	8.20382e-06	0.377411	-2.64963
NM_000637	A_32_P31618	GSR	glutathione reductase	1.29994e-05	0.460126	-2.17332
NM_002627	A_23_P46928	PFKP	phosphofructokinase, platelet	7.73914e-06	0.493196	-2.02759
NM_182314	A_24_P391468	ENOX2	ecto-NOX disulfide-thiol exchanger 2	1.70138e-06	0.286336	-3.4924
NR_003682	A_32_P221256	MGC70870	C-terminal binding protein 2 pseudogene	2.93304e-06	0.311681	-3.20841
NM_198501	A_24_P555066	SMTNL2	smoothelin-like 2	2.12649e-05	0.27864	-3.58886
NM_004975	A_24_P31627	KCNB1	potassium voltage-gated channel, Shab-related subfamily, member 1	4.71223e-07	8.62485	8.62485
NM_005338	A_24_P916314	HIP1	huntingtin interacting protein 1	5.80637e-06	0.247997	-4.0323
NM_005595	A_23_P85682	NFIA	nuclear factor I/A	2.05235e-06	0.119692	-8.35475
NM_001024912	A_23_P55738	CEACAM1	carcinoembryonic antigen-related cell adhesion molecule 1 (biliary glycoprotein)	4.68328e-06	17.4755	17.4755
NM_012139	A_24_P364087	SERGEF	secretion regulating guanine nucleotide exchange factor	6.54807e-06	0.306132	-3.26656
NM_053004	A_23_P218751	GNB1L	guanine nucleotide binding protein (G protein), beta polypeptide 1-like	1.24479e-05	0.378514	-2.64191
NM_001116	A_24_P935103	ADCY9	adenylate cyclase 9	5.59584e-05	0.362709	-2.75703
NM_024320	A_23_P118894	PRR15L	proline rich 15-like	1.5157e-05	0.223199	-4.48031
NM_001008707	A_23_P205746	EML1	echinoderm microtubule associated protein like 1	9.49779e-06	0.431282	-2.31867
ENST00000409852	A_24_P174353	NPPC	natriuretic peptide C	4.04821e-06	6.8181	6.8181
NM_015920	A_23_P14734	RPS27L	ribosomal protein S27-like	2.69208e-05	3.12257	3.12257
NM_005322	A_23_P250385	HIST1H1B	histone cluster 1, H1b	3.92289e-05	0.0958428	-10.4338
NM_022138	A_23_P70307	SMOC2	SPARC related modular calcium binding 2	1.33218e-05	0.0952855	-10.4948
NM_015042	A_32_P176609	ZNF609	zinc finger protein 609	0.000118718	0.44082	-2.2685
NM_032664	A_23_P22409	FUT10	fucosyltransferase 10 (alpha (1,3) fucosyltransferase)	0.000555264	0.419295	-2.38496
NM_001264573	?	?	?	2.09778e-05	0.230948	-4.32998
NR_001450	A_24_P169048	RFPL3-AS1	RFPL3 antisense RNA 1 (non-protein coding)	3.69513e-06	5.27385	5.27385
NM_003579	A_23_P74115	RAD54L	RAD54-like (S. cerevisiae)	1.03271e-05	0.23672	-4.2244
NM_006698	A_23_P419624	BLCAP	bladder cancer associated protein	8.93196e-07	5.08295	5.08295
NM_000835	A_24_P25530	GRIN2C	glutamate receptor, ionotropic, N-methyl D-aspartate 2C	1.22302e-06	15.1651	15.1651
NM_018125	A_23_P386	ARHGEF10L	Rho guanine nucleotide exchange factor (GEF) 10-like	7.03664e-05	0.339737	-2.94345
NM_014346	A_32_P10633	TBC1D22A	TBC1 domain family, member 22A	1.43113e-05	0.174031	-5.74611
NM_000609	A_24_P412156	CXCL12	chemokine (C-X-C motif) ligand 12	2.03354e-05	0.105986	-9.43525
NM_000507	A_23_P257111	FBP1	fructose-1,6-bisphosphatase 1	2.48225e-05	0.374802	-2.66808
NM_019013	A_23_P49878	FAM64A	family with sequence similarity 64, member A	7.34381e-06	0.233551	-4.28172
NM_207111	A_24_P469641	RNF216	ring finger protein 216	0.000100769	0.43902	-2.2778
NM_147128	A_23_P325017	ZNRF2	zinc and ring finger 2	3.77688e-06	0.230221	-4.34365
NM_005723	A_23_P61886	TSPAN5	tetraspanin 5	3.81239e-05	0.458366	-2.18166
AL049387	A_32_P145335			9.09333e-06	0.286074	-3.4956
NM_003841	A_23_P256724	TNFRSF10C	tumor necrosis factor receptor superfamily, member 10c, decoy without an intracellular domain	1.89109e-06	8.25461	8.25461
NM_130791	A_24_P116606	WWOX	WW domain containing oxidoreductase	6.17432e-06	0.217919	-4.58886
NM_005391	A_23_P250478	PDK3	pyruvate dehydrogenase kinase, isozyme 3	2.17189e-06	0.427186	-2.3409
NM_024780	A_23_P15101	TMC5	transmembrane channel-like 5	2.17564e-05	0.219289	-4.5602
NM_133263	A_32_P211188	PPARGC1B	peroxisome proliferator-activated receptor gamma, coactivator 1 beta	0.000357854	0.424012	-2.35842
NM_003831	A_23_P55584	RIOK3	RIO kinase 3 (yeast)	1.82337e-05	2.21953	2.21953
BC007606	A_32_P188921			1.17663e-05	0.182063	-5.49262
NM_153498	A_32_P208120	CAMK1D	calcium/calmodulin-dependent protein kinase ID	8.35645e-06	0.203198	-4.92131
CU686711	A_24_P524452			0.00010812	0.282493	-3.53991
XR_432412	?	?	?	1.39814e-05	0.330757	-3.02337
NM_024730	A_23_P64919	RERGL	RERG/RAS-like	1.50745e-06	0.031944	-31.3048
NM_032432	A_23_P255672	ABLIM2	actin binding LIM protein family, member 2	5.19901e-05	0.399135	-2.50542
NM_001144995	A_24_P263259	CCDC85C	coiled-coil domain containing 85C	0.000109818	0.405921	-2.46354
NM_032892	A_23_P26037	FRMD5	FERM domain containing 5	0.000296462	0.455873	-2.19359
NM_033661	A_23_P211302	WDR4	WD repeat domain 4	1.72036e-05	0.388152	-2.57631
NM_001155	A_23_P357104	ANXA6	annexin A6	7.28327e-06	0.099057	-10.0952
NM_032343	A_23_P91870	CHCHD6	coiled-coil-helix-coiled-coil-helix domain containing 6	1.14744e-05	0.287076	-3.4834
NM_021960	A_24_P336759	MCL1	myeloid cell leukemia sequence 1 (BCL2-related)	1.95675e-05	2.13761	2.13761
NM_020408	A_32_P116813	LYRM4	LYR motif containing 4	6.37177e-06	0.259227	-3.85762
NM_004669	A_23_P254654	CLIC3	chloride intracellular channel 3	8.29014e-06	0.14221	-7.03188
NM_004560	A_24_P101704	ROR2	receptor tyrosine kinase-like orphan receptor 2	3.6977e-05	0.202026	-4.94986
ENST00000310380	A_32_P26443	XXYLT1	xyloside xylosyltransferase 1	2.90778e-05	0.324101	-3.08546
NM_016269	A_24_P20630	LEF1	lymphoid enhancer-binding factor 1	5.33344e-05	0.225986	-4.42506
NM_024076	A_24_P373844	KCTD15	potassium channel tetramerisation domain containing 15	5.95434e-05	0.450928	-2.21765
NM_002332	A_23_P124837	LRP1	low density lipoprotein receptor-related protein 1	1.02112e-05	3.79632	3.79632
NM_138962	A_23_P44195	MSI2	musashi homolog 2 (Drosophila)	1.15169e-05	0.298306	-3.35226
THC2668815	A_24_P478940			3.94969e-06	6.78477	6.78477
NM_002481	A_23_P201790	PPP1R12B	protein phosphatase 1, regulatory subunit 12B	2.36056e-05	0.360027	-2.77757
NM_139177	A_24_P57528	SLC39A11	solute carrier family 39 (metal ion transporter), member 11	1.06592e-05	0.197365	-5.06676
NM_012296	A_24_P98843	GAB2	GRB2-associated binding protein 2	2.61222e-05	0.272119	-3.67486
NM_006186	A_23_P131208	NR4A2	nuclear receptor subfamily 4, group A, member 2	5.27709e-07	4.11389	4.11389
NM_012474	A_23_P487	UCK2	uridine-cytidine kinase 2	1.23339e-05	0.467833	-2.13751
NM_020883	A_23_P383118	ZSWIM5	zinc finger, SWIM-type containing 5	2.96391e-05	0.21376	-4.67815
NM_019619	A_24_P35478	PARD3	par-3 partitioning defective 3 homolog (C. elegans)	5.36011e-06	0.0874812	-11.431
THC2656479	A_23_P101121			6.14531e-06	0.237337	-4.21342
BU602485	A_32_P4433			2.85532e-06	8.3764	8.3764
NM_015910	A_23_P90565	WDPCP	WD repeat containing planar cell polarity effector	3.0711e-06	0.312341	-3.20163
NM_012426	A_32_P173298	SF3B3	splicing factor 3b, subunit 3, 130kDa	3.0271e-05	0.464862	-2.15118
NM_001012271	A_23_P118815	BIRC5	baculoviral IAP repeat containing 5	6.46717e-06	0.148078	-6.75318
NM_015326	A_23_P200829	SRGAP2	SLIT-ROBO Rho GTPase activating protein 2	1.58232e-05	0.147494	-6.77993
A_24_P755069	?	?	?	2.05578e-05	2.15632	2.15632
NM_144981	A_23_P203305	IMMP1L	IMP1 inner mitochondrial membrane peptidase-like (S. cerevisiae)	4.56499e-06	0.314883	-3.17578
AF119870	A_24_P308144			2.7122e-05	3.53493	3.53493
NM_152341	A_23_P66211	PAQR4	progestin and adipoQ receptor family member IV	3.7669e-05	0.274835	-3.63854
TCONS_00015713	?	?	?	4.03133e-06	9.63092	9.63092
NM_001031711	A_24_P97770	ERGIC1	endoplasmic reticulum-golgi intermediate compartment (ERGIC) 1	4.12676e-05	0.33348	-2.99868
NM_002632	A_23_P76992	PGF	placental growth factor	2.74694e-06	11.2107	11.2107
NM_014906	A_32_P73796	PPM1E	protein phosphatase, Mg2+/Mn2+ dependent, 1E	1.89705e-06	0.14901	-6.71095
NM_006037	A_24_P8892	HDAC4	histone deacetylase 4	0.000138639	0.35698	-2.80127
NM_001178138	A_24_P414169	TFDP2	transcription factor Dp-2 (E2F dimerization partner 2)	4.35464e-05	0.292729	-3.41612
NM_016399	A_23_P128408	TRIAP1	TP53 regulated inhibitor of apoptosis 1	2.1347e-05	3.97154	3.97154
ENST00000460809	A_24_P85117			8.30496e-05	0.241318	-4.14391
BC032715	A_24_P366555	BBS9	Bardet-Biedl syndrome 9	0.000134606	0.436886	-2.28892
NM_032933	A_23_P89824	C18orf45	chromosome 18 open reading frame 45	1.72848e-05	0.234536	-4.26373
NM_001008530	A_23_P25994	LGMN	legumain	5.43398e-06	2.61241	2.61241
AJ243950	A_23_P139207	SERGEF	secretion regulating guanine nucleotide exchange factor	1.17445e-05	0.276405	-3.61788
AF116716	A_24_P214014			0.00130291	0.484983	-2.06193
NM_198061	A_23_P49192	CES2	carboxylesterase 2	2.43578e-06	5.4588	5.4588
NM_000056	A_23_P93464	BCKDHB	branched chain keto acid dehydrogenase E1, beta polypeptide	3.3598e-06	0.310117	-3.22459
NM_001386	A_24_P38347	DPYSL2	dihydropyrimidinase-like 2	1.52664e-05	0.18705	-5.34617
ENST00000606587	?	?	?	5.04986e-06	3.83213	3.83213
NM_005067	A_23_P69121	SIAH2	seven in absentia homolog 2 (Drosophila)	9.40838e-05	0.359952	-2.77815
AK074562	A_24_P456452			0.000199013	5.65583	5.65583
NM_001042422	A_23_P158725	SLC16A3	solute carrier family 16, member 3 (monocarboxylic acid transporter 4)	2.47714e-05	0.323589	-3.09034
A_32_P106615	?	?	?	7.12159e-06	0.036627	-27.3023
NM_006739	A_23_P132277	MCM5	minichromosome maintenance complex component 5	2.50248e-05	0.337986	-2.95871
NM_213590	A_23_P99360	TRIM13	tripartite motif containing 13	1.93021e-07	2.06574	2.06574
NM_007026	A_23_P207537	DUSP14	dual specificity phosphatase 14	3.15922e-06	2.12924	2.12924
NM_031989	A_32_P214943	PCBP2	poly(rC) binding protein 2	1.10442e-05	0.459828	-2.17473
NM_176877	A_32_P88958	INADL	InaD-like (Drosophila)	4.14657e-06	0.440913	-2.26802
NM_005342	A_23_P217236	HMGB3	high mobility group box 3	4.9797e-05	2.06575	2.06575
NM_153341	A_23_P321388	RNF19B	ring finger protein 19B	4.4724e-06	4.17849	4.17849
NM_175859	A_23_P10305	CTPS2	CTP synthase II	3.42382e-07	0.395923	-2.52575
ENST00000383763	?	?	?	0.00215118	0.385229	-2.59586
NM_152240	A_24_P639629	ZMAT3	zinc finger, matrin-type 3	3.94441e-05	5.55775	5.55775
NM_006077	A_23_P46907	MICU1	mitochondrial calcium uptake 1	3.82746e-06	0.249594	-4.00651
NM_004822	A_32_P53524	NTN1	netrin 1	0.00042359	0.407274	-2.45535
NM_004864	A_23_P16523	GDF15	growth differentiation factor 15	2.27269e-06	11.4193	11.4193
NM_006567	A_23_P33720	FARS2	phenylalanyl-tRNA synthetase 2, mitochondrial	1.00118e-05	0.151907	-6.58299
NM_181719	A_23_P158277	TMCO4	transmembrane and coiled-coil domains 4	4.05822e-05	0.439615	-2.27472
NM_018264	A_32_P52206	TYW1	tRNA-yW synthesizing protein 1 homolog (S. cerevisiae)	4.69777e-06	0.388867	-2.57157
NM_030761	A_23_P382607	WNT4	wingless-type MMTV integration site family, member 4	1.86805e-06	4.23491	4.23491
NM_000919	A_24_P97703	PAM	peptidylglycine alpha-amidating monooxygenase	1.25458e-05	0.288176	-3.4701
NM_004237	A_24_P277576	TRIP13	thyroid hormone receptor interactor 13	6.21287e-06	0.286414	-3.49145
NM_152357	A_24_P254088	ZNF440	zinc finger protein 440	6.91954e-05	5.42362	5.42362
NM_206808	A_23_P376591	CLYBL	citrate lyase beta like	1.36125e-05	0.299301	-3.34112
A_24_P306896	?	?	?	1.41463e-05	0.271074	-3.68903
NM_015170	A_23_P43164	SULF1	sulfatase 1	1.02971e-05	0.224828	-4.44784
NM_031462	A_24_P194524	CD99L2	CD99 molecule-like 2	8.79791e-05	0.488626	-2.04655
NM_024650	A_23_P96165	C11orf80	chromosome 11 open reading frame 80	1.16352e-05	0.156179	-6.40292
NM_003745	A_24_P48014	SOCS1	suppressor of cytokine signaling 1	5.34872e-05	6.12006	6.12006
NM_015559	A_32_P32413	SETBP1	SET binding protein 1	3.45373e-05	0.164854	-6.06596
NM_014505	A_32_P219635	KCNMB4	potassium large conductance calcium-activated channel, subfamily M, beta member 4	3.25576e-05	0.212147	-4.71371
NM_000146	A_32_P155247	FTL	ferritin, light polypeptide	5.92085e-06	2.26812	2.26812
NM_002844	A_32_P99100	PTPRK	protein tyrosine phosphatase, receptor type, K	5.87563e-06	0.0988152	-10.1199
NM_001037633	A_23_P252903	SIL1	SIL1 homolog, endoplasmic reticulum chaperone (S. cerevisiae)	1.0802e-05	0.341218	-2.93068
NM_004430	A_23_P216225	EGR3	early growth response 3	0.00016589	0.217842	-4.59047
NM_152542	A_24_P214598	PPM1K	protein phosphatase, Mg2+/Mn2+ dependent, 1K	2.71006e-06	0.306157	-3.2663
NM_001017915	A_23_P61149	INPP5D	inositol polyphosphate-5-phosphatase, 145kDa	1.41631e-06	26.2658	26.2658
NM_207363	A_23_P360079	NCKAP5	NCK-associated protein 5	1.21014e-05	0.228744	-4.3717
NM_014326	A_24_P10233	DAPK2	death-associated protein kinase 2	0.000112874	0.385914	-2.59125
THC2516487	A_23_P252125			1.49547e-06	2.16765	2.16765
NM_025144	A_23_P133142	ALPK1	alpha-kinase 1	5.31857e-06	0.206098	-4.85207
NM_000434	A_24_P394533	NEU1	sialidase 1 (lysosomal sialidase)	3.59402e-06	3.05273	3.05273
NM_032505	A_23_P431252	KBTBD8	kelch repeat and BTB (POZ) domain containing 8	0.000298191	4.09403	4.09403
NM_012081	A_23_P58506	ELL2	elongation factor, RNA polymerase II, 2	1.78327e-05	3.51825	3.51825
NM_177963	A_23_P424648	SYT12	synaptotagmin XII	2.36565e-05	0.255228	-3.91806
ENST00000424068	?	?	?	5.79595e-05	0.412903	-2.42188
A_23_P158897	?	?	?	5.65412e-05	0.456699	-2.18962
NM_145307	A_24_P13041	RTKN2	rhotekin 2	8.92552e-06	0.210301	-4.75508
NM_006426	A_23_P331049	DPYSL4	dihydropyrimidinase-like 4	3.37334e-06	11.6346	11.6346
NM_014397	A_23_P216920	NEK6	NIMA (never in mitosis gene a)-related kinase 6	7.36789e-05	0.49075	-2.0377
NM_018339	A_32_P218883	RFK	riboflavin kinase	9.93614e-05	3.93572	3.93572
NM_015202	A_24_P401174	KIAA0556	KIAA0556	8.33037e-05	0.372477	-2.68473
NM_016621	A_24_P41524	PHF21A	PHD finger protein 21A	2.5171e-05	0.370754	-2.69721
NM_001085375	A_23_P103511	C1orf226	chromosome 1 open reading frame 226	0.000120431	0.169117	-5.91305
NM_022970	A_24_P206624	FGFR2	fibroblast growth factor receptor 2	4.37121e-05	0.420786	-2.3765
NM_017422	A_23_P124095	CALML5	calmodulin-like 5	6.00901e-05	0.309303	-3.23307
NM_017918	A_23_P255376	CCDC109B	coiled-coil domain containing 109B	3.59211e-06	0.360766	-2.77188
A_24_P195400	?	?	?	1.27855e-05	0.184862	-5.40943
NM_000825	A_23_P254594	GNRH1	gonadotropin-releasing hormone 1 (luteinizing-releasing hormone)	0.000164233	3.31818	3.31818
NM_145315	A_32_P37360	LACE1	lactation elevated 1	3.64321e-06	0.360479	-2.77409
CD511705	A_32_P126832			1.44938e-05	3.57011	3.57011
NM_015394	A_24_P215475	ZNF10	zinc finger protein 10	0.000121419	3.75807	3.75807
A_24_P638453	?	?	?	1.80436e-05	0.307103	-3.25623
A_24_P660797	?	?	?	2.09472e-05	0.452243	-2.2112
NM_001083926	A_23_P379864	ASRGL1	asparaginase like 1	3.76432e-05	0.489192	-2.04419
NM_000136	A_23_P32021	FANCC	Fanconi anemia, complementation group C	1.63817e-05	0.155473	-6.43198
NM_033160	A_32_P220739	ZNF658	zinc finger protein 658	0.000212424	5.15929	5.15929
NM_153746	A_24_P269129	ZDHHC14	zinc finger, DHHC-type containing 14	0.000127811	0.321332	-3.11205
NM_032208	A_24_P131522	ANTXR1	anthrax toxin receptor 1	1.83692e-05	0.281354	-3.55425
NM_033148	A_24_P216421	DTNB	dystrobrevin, beta	2.04291e-05	0.156389	-6.39433
NM_001306	A_24_P35109	CLDN3	claudin 3	3.52806e-05	0.476429	-2.09895
NM_004296	A_23_P205666	RGS6	regulator of G-protein signaling 6	3.92783e-05	0.15275	-6.54663
NM_080489	A_23_P131899	SDCBP2	syndecan binding protein (syntenin) 2	5.33553e-06	6.63299	6.63299
NM_175569	A_32_P437004	XG	Xg blood group	5.64505e-06	5.33699	5.33699
NM_001033580	A_23_P100868	MYO19	myosin XIX	2.8332e-05	0.397539	-2.51548
NM_014772	A_23_P207967	CTIF	CBP80/20-dependent translation initiation factor	8.27351e-05	0.26348	-3.79536
NM_080821	A_24_P399680	C20orf108	chromosome 20 open reading frame 108	4.04203e-05	2.57981	2.57981
NM_024900	A_23_P410587	PHF17	PHD finger protein 17	3.28232e-05	0.313979	-3.18493
NM_032737	A_23_P67725	LMNB2	lamin B2	7.08379e-05	0.463152	-2.15912
NM_198516	A_23_P139418	GALNTL4	UDP-N-acetyl-alpha-D-galactosamine:polypeptide N-acetylgalactosaminyltransferase-like 4	5.01463e-05	0.217291	-4.60211
NM_004417	A_23_P110712	DUSP1	dual specificity phosphatase 1	2.85391e-05	2.72944	2.72944
NM_152588	A_23_P382705	TMTC2	transmembrane and tetratricopeptide repeat containing 2	6.06965e-06	0.118167	-8.46261
NM_006736	A_24_P102981	DNAJB2	DnaJ (Hsp40) homolog, subfamily B, member 2	3.63856e-06	2.76089	2.76089
NM_018196	A_24_P40529	TMLHE	trimethyllysine hydroxylase, epsilon	1.91352e-05	0.450045	-2.222
NM_003546	A_23_P70480	HIST1H4L	histone cluster 1, H4l	2.24266e-05	0.125243	-7.98449
NM_152305	A_32_P26376	POGLUT1	protein O-glucosyltransferase 1	4.82569e-05	2.92347	2.92347
NM_174899	A_24_P254702	FBXO36	F-box protein 36	4.48504e-05	0.43175	-2.31616
NM_021202	A_24_P357465	TP53INP2	tumor protein p53 inducible nuclear protein 2	1.51305e-05	6.94191	6.94191
NM_024537	A_23_P128624	CARS2	cysteinyl-tRNA synthetase 2, mitochondrial (putative)	8.59418e-05	0.472723	-2.1154
NM_017519	A_24_P366735	ARID1B	AT rich interactive domain 1B (SWI1-like)	0.000222531	0.482415	-2.0729
NM_030812	A_32_P176018	ACTL8	actin-like 8	0.000119126	0.348461	-2.86976
NM_015341	A_23_P415443	NCAPH	non-SMC condensin I complex, subunit H	9.94934e-06	0.231847	-4.31319
NM_014859	A_23_P26854	ARHGAP44	Rho GTPase activating protein 44	3.69203e-05	0.461671	-2.16605
NM_005225	A_23_P80032	E2F1	E2F transcription factor 1	4.60621e-05	0.253764	-3.94068
NM_004658	A_23_P139600	RASAL1	RAS protein activator like 1 (GAP1 like)	7.69682e-06	4.76174	4.76174
ENST00000561095	?	?	?	0.000193448	0.257284	-3.88676
NM_014824	A_24_P302038	FCHSD2	FCH and double SH3 domains 2	3.16967e-05	0.31054	-3.22019
NM_018224	A_23_P215675	C7orf44	chromosome 7 open reading frame 44	1.30882e-05	0.350774	-2.85084
NM_024541	A_24_P352200	C10orf76	chromosome 10 open reading frame 76	1.82557e-05	0.311149	-3.2139
ENST00000394457	?	?	?	2.64386e-05	6.74579	6.74579
NM_001042416	A_32_P187663	ZNF596	zinc finger protein 596	9.41522e-05	3.45436	3.45436
A_23_P5171	?	?	?	2.40204e-05	0.490317	-2.0395
NM_015193	A_23_P365738	ARC	activity-regulated cytoskeleton-associated protein	3.47518e-05	15.4353	15.4353
NM_001080494	A_23_P160214	TTC39A	tetratricopeptide repeat domain 39A	4.50454e-05	0.36778	-2.71902
NM_004879	A_24_P4661	EI24	etoposide induced 2.4 mRNA	4.1574e-05	2.31782	2.31782
NM_001284304	?	?	?	4.4436e-05	0.198833	-5.02934
NM_007275	A_24_P165965	TUSC2	tumor suppressor candidate 2	2.71781e-06	2.04935	2.04935
NM_031942	A_24_P171549	CDCA7	cell division cycle associated 7	2.98312e-05	0.206993	-4.83107
NM_175058	A_24_P348806	PLEKHA7	pleckstrin homology domain containing, family A member 7	0.000131916	0.275479	-3.63003
NM_001134647	A_23_P72387	AFAP1	actin filament associated protein 1	0.000130823	0.351162	-2.84769
NM_004787	A_23_P144348	SLIT2	slit homolog 2 (Drosophila)	1.10328e-05	0.0479152	-20.8702
NM_022897	A_23_P58819	RANBP17	RAN binding protein 17	3.96223e-06	0.237759	-4.20594
NM_003409	A_24_P74064	ZFP161	zinc finger protein 161 homolog (mouse)	0.000100343	0.481999	-2.07469
NM_004048	A_23_P37441	B2M	beta-2-microglobulin	0.000112681	2.14712	2.14712
NM_000221	A_23_P5845	KHK	ketohexokinase (fructokinase)	4.10278e-05	0.385113	-2.59664
NM_181552	A_24_P220454	CUX1	cut-like homeobox 1	1.87054e-05	0.170228	-5.87448
NM_032359	A_23_P132874	C3orf26	chromosome 3 open reading frame 26	2.24069e-06	0.162406	-6.15741
BC028243	A_24_P111019			0.000945927	0.475819	-2.10164
NM_004481	A_24_P353794	GALNT2	UDP-N-acetyl-alpha-D-galactosamine:polypeptide N-acetylgalactosaminyltransferase 2 (GalNAc-T2)	2.59113e-05	0.405156	-2.46818
NM_003302	A_24_P4054	TRIP6	thyroid hormone receptor interactor 6	6.19441e-06	2.19122	2.19122
NM_004973	A_23_P214876	JARID2	jumonji, AT rich interactive domain 2	0.000101749	0.225277	-4.43898
NM_021913	A_23_P208389	AXL	AXL receptor tyrosine kinase	1.16883e-06	5.82526	5.82526
NM_024907	A_23_P101871	FBXO17	F-box protein 17	2.53307e-05	0.313769	-3.18705
ENST00000468376	A_23_P369666	ZMYND8	zinc finger, MYND-type containing 8	0.0040328	0.453485	-2.20514
NM_015173	A_24_P943613	TBC1D1	TBC1 (tre-2/USP6, BUB2, cdc16) domain family, member 1	2.60453e-05	0.266119	-3.75772
NM_173678	A_32_P214925	FAM115C	family with sequence similarity 115, member C	0.000108691	0.217325	-4.6014
NM_002482	A_32_P28365	NASP	nuclear autoantigenic sperm protein (histone-binding)	1.7294e-06	0.430982	-2.32028
THC2650423	A_32_P127583			0.000280836	0.248102	-4.0306
ENST00000514409	?	?	?	6.78723e-05	0.219649	-4.55271
NM_170692	A_24_P419250	RASAL2	RAS protein activator like 2	1.96913e-05	0.300671	-3.3259
NM_000898	A_23_P85015	MAOB	monoamine oxidase B	2.2277e-05	0.0381326	-26.2243
NM_014010	A_23_P357936	ASTN2	astrotactin 2	3.08709e-05	0.135566	-7.37648
NM_005441	A_23_P57306	CHAF1B	chromatin assembly factor 1, subunit B (p60)	8.86845e-05	0.458147	-2.1827
NM_001731	A_23_P87560	BTG1	B-cell translocation gene 1, anti-proliferative	2.99312e-05	2.34316	2.34316
NM_020397	A_23_P124252	CAMK1D	calcium/calmodulin-dependent protein kinase ID	0.000340667	0.32225	-3.10318
NM_001024666	A_24_P289139	SH3KBP1	SH3-domain kinase binding protein 1	6.66149e-06	0.214756	-4.65644
NM_001242415	A_24_P162412	WDR20	WD repeat domain 20	0.000153494	0.470377	-2.12595
NM_006626	A_23_P83234	ZBTB6	zinc finger and BTB domain containing 6	0.000797121	3.51621	3.51621
NM_001380	A_23_P45059	DOCK1	dedicator of cytokinesis 1	5.40194e-06	0.120056	-8.32944
NM_138689	A_24_P417984	PPP1R14B	protein phosphatase 1, regulatory (inhibitor) subunit 14B	3.54752e-05	0.497948	-2.00824
AK056691	A_24_P76521	GSG2	germ cell associated 2 (haspin)	0.000125698	0.382999	-2.61097
THC2668923	?	?	?	6.75916e-05	7.31344	7.31344
NM_207387	A_23_P368484	C17orf76	chromosome 17 open reading frame 76	0.000221658	0.484399	-2.06442
NM_006427	A_24_P116351	SIVA1	SIVA1, apoptosis-inducing factor	1.58066e-05	0.457962	-2.18359
NM_014007	A_24_P149713	ZBTB43	zinc finger and BTB domain containing 43	3.03672e-07	2.20384	2.20384
NM_015484	A_23_P45756	SYF2	SYF2 homolog, RNA splicing factor (S. cerevisiae)	0.000221124	2.58946	2.58946
NM_052950	A_24_P176131	WDFY2	WD repeat and FYVE domain containing 2	3.95551e-05	0.430402	-2.32341
NM_004605	A_23_P107981	SULT2B1	sulfotransferase family, cytosolic, 2B, member 1	5.08921e-05	0.228678	-4.37296
NM_005585	A_23_P65812	SMAD6	SMAD family member 6	0.000961034	0.426613	-2.34404
NM_015330	A_32_P203515	SPECC1L	sperm antigen with calponin homology and coiled-coil domains 1-like	1.32719e-05	0.398592	-2.50883
ENST00000607016	?	?	?	8.37061e-06	0.261169	-3.82894
NR_038227	A_32_P144018	LOC100506451	uncharacterized LOC100506451	8.64036e-05	0.343791	-2.90874
NM_001379	A_24_P408083	DNMT1	DNA (cytosine-5-)-methyltransferase 1	5.20746e-05	0.409742	-2.44056
NM_005197	A_23_P88435	FOXN3	forkhead box N3	1.61167e-05	0.290546	-3.44179
NM_001039966	A_23_P8640	GPER	G protein-coupled estrogen receptor 1	6.21421e-05	0.308876	-3.23754
NM_016653	A_23_P366394	ZAK	sterile alpha motif and leucine zipper containing kinase AZK	5.49959e-05	0.322126	-3.10438
ENST00000604665	?	?	?	3.9113e-05	0.384069	-2.6037
THC2691966	A_32_P15874			0.000715228	2.4891	2.4891
A_24_P50328	?	?	?	3.55569e-05	0.174517	-5.73009
NM_020166	A_23_P58036	MCCC1	methylcrotonoyl-CoA carboxylase 1 (alpha)	3.0035e-05	0.410788	-2.43434
NM_024605	A_23_P21548	ARHGAP10	Rho GTPase activating protein 10	2.93123e-05	0.21826	-4.58169
NM_170744	A_23_P52336	UNC5B	unc-5 homolog B (C. elegans)	9.5624e-07	6.49775	6.49775
NM_002570	A_23_P151907	PCSK6	proprotein convertase subtilisin/kexin type 6	4.55874e-05	0.297296	-3.36366
NM_002395	A_23_P8196	ME1	malic enzyme 1, NADP(+)-dependent, cytosolic	7.23535e-06	0.309048	-3.23574
DM107643	?	?	?	0.000237037	2.19918	2.19918
NM_021065	A_23_P428184	HIST1H2AD	histone cluster 1, H2ad	1.18631e-05	3.1926	3.1926
NM_001123	A_23_P112596	ADK	adenosine kinase	3.90283e-06	0.138961	-7.19626
NM_133638	A_23_P259851	ADAMTS19	ADAM metallopeptidase with thrombospondin type 1 motif, 19	3.98814e-06	0.0953672	-10.4858
A_32_P198179	?	?	?	6.30109e-05	3.39774	3.39774
NM_024915	A_24_P35228	GRHL2	grainyhead-like 2 (Drosophila)	5.64129e-05	0.285505	-3.50257
NM_003981	A_23_P206059	PRC1	protein regulator of cytokinesis 1	7.00142e-06	0.274999	-3.63637
NM_012396	A_23_P62959	PHLDA3	pleckstrin homology-like domain, family A, member 3	1.24571e-05	3.92466	3.92466
THC2577566	?	?	?	3.5468e-05	4.59789	4.59789
NM_006933	A_23_P109304	SLC5A3	solute carrier family 5 (sodium/myo-inositol cotransporter), member 3	0.00206341	2.24109	2.24109
NM_016329	?	?	?	0.000170855	0.464429	-2.15318
NM_021937	A_23_P144202	EEFSEC	eukaryotic elongation factor, selenocysteine-tRNA-specific	5.87969e-05	0.290366	-3.44393
U88048	A_23_P127153			0.000287525	0.345871	-2.89125
NM_019845	A_23_P5370	RPRM	reprimo, TP53 dependent G2 arrest mediator candidate	3.69479e-05	0.118132	-8.46512
NM_153831	A_23_P72050	PTK2	PTK2 protein tyrosine kinase 2	3.64665e-06	0.198044	-5.04938
NM_006829	A_23_P161439	C10orf116	chromosome 10 open reading frame 116	9.27891e-06	3.79781	3.79781
NM_174889	A_32_P49555	NDUFAF2	NADH dehydrogenase (ubiquinone) 1 alpha subcomplex, assembly factor 2	9.04119e-06	0.280553	-3.56439
NM_152369	A_23_P86195	SLC44A3	solute carrier family 44, member 3	1.85789e-05	0.443495	-2.25482
NR_024490	A_24_P342150	LOC100129387	uncharacterized LOC100129387	2.65275e-05	2.90264	2.90264
CF124646	?	?	?	2.69083e-05	3.63312	3.63312
THC2650514	A_32_P200120			3.2893e-05	3.92351	3.92351
NM_001001342	A_24_P295543	BLOC1S2	biogenesis of lysosomal organelles complex-1, subunit 2	0.000257533	3.89764	3.89764
NM_153186	A_32_P64570	KANK1	KN motif and ankyrin repeat domains 1	0.000185381	0.496239	-2.01516
BC007784	A_32_P142149			8.20889e-05	0.2613	-3.82703
NM_015713	A_23_P20225	RRM2B	ribonucleotide reductase M2 B (TP53 inducible)	0.00085765	7.85461	7.85461
NM_002020	A_23_P356070	FLT4	fms-related tyrosine kinase 4	6.30921e-05	0.256371	-3.9006
NM_016529	A_23_P258612	ATP8A2	ATPase, aminophospholipid transporter, class I, type 8A, member 2	0.000100607	0.223814	-4.468
NM_001514	A_23_P34628	GTF2B	general transcription factor IIB	6.74643e-05	2.25919	2.25919
NM_032637	A_23_P156310	SKP2	S-phase kinase-associated protein 2 (p45)	1.3224e-05	0.337066	-2.96678
NM_007152	A_23_P252748	ZNF195	zinc finger protein 195	0.000251451	5.75765	5.75765
NM_199427	A_23_P120467	ZFP64	zinc finger protein 64 homolog (mouse)	0.000655078	0.465764	-2.14701
NM_014953	A_24_P395317	DIS3	DIS3 mitotic control homolog (S. cerevisiae)	0.00174683	3.59312	3.59312
NM_001873	A_23_P259442	CPE	carboxypeptidase E	2.20303e-05	2.09157	2.09157
NM_014182	A_24_P124567	ORMDL2	ORM1-like 2 (S. cerevisiae)	1.11461e-05	2.06699	2.06699
NM_201612	A_23_P53467	IKBIP	IKBKB interacting protein	9.90802e-05	4.41185	4.41185
NM_004900	A_24_P66027	APOBEC3B	apolipoprotein B mRNA editing enzyme, catalytic polypeptide-like 3B	2.79678e-05	0.323592	-3.09031
NM_003105	A_23_P87049	SORL1	sortilin-related receptor, L(DLR class) A repeats containing	9.21309e-05	0.363555	-2.75061
NM_000168	A_23_P111531	GLI3	GLI family zinc finger 3	0.001176	0.257076	-3.8899
NM_153377	A_23_P47885	LRIG3	leucine-rich repeats and immunoglobulin-like domains 3	0.000531279	0.442392	-2.26044
NM_020375	A_24_P564462	C12orf5	chromosome 12 open reading frame 5	4.85929e-05	4.17248	4.17248
NM_014788	A_24_P197964	TRIM14	tripartite motif containing 14	0.000141098	0.442706	-2.25884
NM_018100	A_32_P86245	EFHC1	EF-hand domain (C-terminal) containing 1	2.12131e-05	0.439954	-2.27297
NM_005418	A_23_P24884	ST5	suppression of tumorigenicity 5	0.000233684	0.278382	-3.59219
NM_001198844	A_24_P933138	RBM4	RNA binding motif protein 4	3.71924e-06	2.19344	2.19344
NM_001006636	A_23_P153945	GTDC1	glycosyltransferase-like domain containing 1	1.11585e-05	0.0974627	-10.2603
AF363068	A_24_P85619			2.53647e-05	0.477275	-2.09523
NM_003875	A_23_P21033	GMPS	guanine monphosphate synthetase	7.94699e-06	0.405329	-2.46713
NM_199051	A_23_P103812	FAM5C	family with sequence similarity 5, member C	1.35905e-05	0.0285482	-35.0285
NM_021970	A_32_P10311	LAMTOR3	late endosomal/lysosomal adaptor, MAPK and MTOR activator 3	0.00113713	2.62317	2.62317
NM_015282	A_23_P311232	CLASP1	cytoplasmic linker associated protein 1	1.88702e-05	0.336043	-2.97581
NM_003485	A_24_P931443	GPR68	G protein-coupled receptor 68	6.64523e-05	0.0542452	-18.4348
AK097877	A_23_P424305			0.000787692	0.474913	-2.10565
NM_021955	A_24_P196665	GNGT1	guanine nucleotide binding protein (G protein), gamma transducing activity polypeptide 1	1.92945e-05	0.32345	-3.09166
ENST00000344293	A_24_P508012	TAF3	TAF3 RNA polymerase II, TATA box binding protein (TBP)-associated factor, 140kDa	0.00235832	0.421071	-2.37489
NM_014033	A_24_P941773	METTL7A	methyltransferase like 7A	4.46988e-05	0.170059	-5.88031
NM_138381	A_24_P927189	OXNAD1	oxidoreductase NAD-binding domain containing 1	3.4705e-05	0.428324	-2.33468
NM_178006	A_24_P210420	STARD13	StAR-related lipid transfer (START) domain containing 13	0.000230009	0.360931	-2.77062
NM_033409	A_23_P57110	C20orf54	chromosome 20 open reading frame 54	0.000176854	0.358372	-2.7904
THC2746571	A_23_P90780			3.73312e-05	0.446195	-2.24117
ENST00000588184	?	?	?	2.98036e-05	0.284259	-3.51792
NM_001002295	A_23_P75056	GATA3	GATA binding protein 3	0.00039868	0.479444	-2.08575
NM_016231	A_23_P15647	NLK	nemo-like kinase	4.30753e-05	0.439925	-2.27311
NM_014697	A_23_P74309	NOS1AP	nitric oxide synthase 1 (neuronal) adaptor protein	0.000465724	0.240983	-4.14967
NM_014661	A_24_P406814	FAM53B	family with sequence similarity 53, member B	0.000388682	0.365069	-2.73921
NM_014667	A_24_P410582	VGLL4	vestigial like 4 (Drosophila)	6.37968e-05	0.480639	-2.08056
NM_004210	A_23_P322562	NEURL	neuralized homolog (Drosophila)	0.000166527	0.180689	-5.53437
A_32_P85880	?	?	?	0.000132644	2.94328	2.94328
NM_005016	A_24_P141688	PCBP2	poly(rC) binding protein 2	8.68629e-05	0.240736	-4.15393
NM_015381	A_23_P304489	FAM19A5	family with sequence similarity 19 (chemokine (C-C motif)-like), member A5	0.00045679	0.367419	-2.72169
NM_001037131	A_32_P55161	AGAP1	ArfGAP with GTPase domain, ankyrin repeat and PH domain 1	9.80706e-05	0.341638	-2.92708
NM_013262	A_24_P917123	MYLIP	myosin regulatory light chain interacting protein	0.000163836	2.55331	2.55331
NM_000026	A_23_P155103	ADSL	adenylosuccinate lyase	2.50434e-05	0.356016	-2.80886
NM_014612	A_24_P941505	FAM120A	family with sequence similarity 120A	1.33208e-05	0.495304	-2.01896
NM_012145	A_23_P135364	DTYMK	deoxythymidylate kinase (thymidylate kinase)	6.44428e-05	0.48469	-2.06318
NM_006615	A_23_P149427	CAPN9	calpain 9	5.08836e-05	0.221973	-4.50506
NM_173683	A_23_P387000	XKR6	XK, Kell blood group complex subunit-related family, member 6	7.62979e-05	0.183846	-5.43935
NM_020831	A_23_P348138	MKL1	megakaryoblastic leukemia (translocation) 1	0.00141513	0.411999	-2.42719
NM_005438	A_23_P322519	FOSL1	FOS-like antigen 1	7.39632e-06	11.5345	11.5345
NM_004772	A_32_P98423	C5orf13	chromosome 5 open reading frame 13	5.12815e-05	0.216937	-4.60963
NM_054028	A_23_P59988	SLC35G5	solute carrier family 35, member G5	7.55178e-05	2.40782	2.40782
NM_001017372	A_23_P41789	SLC27A6	solute carrier family 27 (fatty acid transporter), member 6	1.07361e-05	0.157213	-6.36078
NM_181801	?	?	?	0.000143898	0.352795	-2.83451
NM_033393	A_23_P328259	FHDC1	FH2 domain containing 1	0.00164344	0.365034	-2.73947
NM_001145667	A_24_P475556	GLG1	golgi glycoprotein 1	0.000192905	0.467876	-2.13732
NM_019556	A_23_P73835	MOSPD1	motile sperm domain containing 1	0.000688843	5.1265	5.1265
L10123	A_24_P63397			4.73095e-05	0.470367	-2.126
NM_014425	A_23_P157970	INVS	inversin	4.93037e-05	0.343862	-2.90815
NM_006726	A_24_P360078	LRBA	LPS-responsive vesicle trafficking, beach and anchor containing	1.45262e-05	0.185879	-5.37985
NM_001142594	A_24_P109633	ITPK1	inositol-tetrakisphosphate 1-kinase	0.000498476	0.379215	-2.63703
NM_007250	A_23_P217528	KLF8	Kruppel-like factor 8	0.000627442	0.431339	-2.31836
A_32_P16625	?	?	?	9.78625e-05	0.248051	-4.03143
NM_003842	A_24_P218265	TNFRSF10B	tumor necrosis factor receptor superfamily, member 10b	2.64437e-06	2.76453	2.76453
NM_001946	A_23_P139704	DUSP6	dual specificity phosphatase 6	5.74313e-05	5.3672	5.3672
THC2471213	?	?	?	0.000232784	0.453205	-2.20651
NM_005442	A_24_P97374	EOMES	eomesodermin	1.94688e-05	2.62814	2.62814
NM_014669	A_32_P163908	NUP93	nucleoporin 93kDa	5.13652e-05	0.453421	-2.20546
A_24_P298179	?	?	?	9.99093e-05	2.04529	2.04529
CD104030	A_32_P115749			0.00363326	5.11743	5.11743
NM_001035005	A_24_P271049	C18orf32	chromosome 18 open reading frame 32	0.000313688	2.10461	2.10461
A_32_P98854	?	?	?	0.000196874	2.10513	2.10513
ENST00000377836	A_24_P214198	HES2	hairy and enhancer of split 2 (Drosophila)	3.5475e-06	6.86908	6.86908
NM_152913	A_23_P349966	TMEM130	transmembrane protein 130	9.85127e-06	41.5854	41.5854
A_24_P417757	?	?	?	0.00581527	2.73753	2.73753
NM_016175	A_24_P363087	C5orf45	chromosome 5 open reading frame 45	2.22915e-05	2.15516	2.15516
A_24_P761386	?	?	?	2.01103e-05	0.302633	-3.30433
NM_003498	A_24_P30923	SNN	stannin	5.45319e-06	2.83282	2.83282
NM_022126	A_24_P355493	LHPP	phospholysine phosphohistidine inorganic pyrophosphate phosphatase	0.000115148	0.360613	-2.77306
NM_015073	A_24_P24343	SIPA1L3	signal-induced proliferation-associated 1 like 3	0.000685161	0.275113	-3.63487
NM_148170	A_24_P115762	CTSC	cathepsin C	0.000225046	0.404831	-2.47016
NM_024322	A_23_P50990	CENPO	centromere protein O	0.000117662	0.414317	-2.41361
NM_002576	A_23_P75989	PAK1	p21 protein (Cdc42/Rac)-activated kinase 1	5.21542e-05	0.338023	-2.95838
NM_012328	A_23_P258944	DNAJB9	DnaJ (Hsp40) homolog, subfamily B, member 9	0.000539668	2.86117	2.86117
NM_024660	A_23_P142424	IGFLR1	IGF-like family receptor 1	0.000133751	0.475253	-2.10414
NM_153034	A_23_P23966	ZNF488	zinc finger protein 488	4.61052e-06	4.15223	4.15223
A_24_P84711	?	?	?	8.20518e-06	0.302015	-3.3111
NR_110453	?	?	?	2.45413e-05	0.382459	-2.61466
A_32_P36709	?	?	?	0.000408177	0.484481	-2.06406
NM_004491	A_24_P44845	ARHGAP35	Rho GTPase activating protein 35	0.00014576	0.368949	-2.7104
NR_026887	A_23_P5018	LOC80054	uncharacterized LOC80054	0.00233915	0.493985	-2.02435
AK090482	A_24_P944054	CXCL12	chemokine (C-X-C motif) ligand 12	2.2621e-05	0.189792	-5.26893
NM_183050	A_24_P914513	BCKDHB	branched chain keto acid dehydrogenase E1, beta polypeptide	1.56903e-05	0.259514	-3.85336
NM_024579	A_23_P74778	C1orf54	chromosome 1 open reading frame 54	4.42603e-06	5.03683	5.03683
AA837799	A_23_P211468			0.000296662	5.1847	5.1847
NM_004269	A_23_P301877	MED27	mediator complex subunit 27	0.000158952	0.374406	-2.6709
NM_031299	A_24_P218979	CDCA3	cell division cycle associated 3	4.7816e-05	0.204172	-4.89782
NM_033502	A_24_P217904	TRERF1	transcriptional regulating factor 1	0.000266354	0.291941	-3.42535
NM_014643	A_24_P910325	ZNF516	zinc finger protein 516	0.00154401	0.418661	-2.38857
NM_153690	A_23_P422144	FAM43A	family with sequence similarity 43, member A	6.70705e-05	4.17481	4.17481
NM_007348	A_24_P453259	ATF6	activating transcription factor 6	2.11274e-05	0.335862	-2.97741
NM_001945	A_24_P140608	HBEGF	heparin-binding EGF-like growth factor	4.02002e-05	8.77346	8.77346
NM_206907	A_23_P110725	PRKAA1	protein kinase, AMP-activated, alpha 1 catalytic subunit	0.000185114	2.18881	2.18881
A_32_P168756	?	?	?	6.29475e-05	0.464468	-2.153
NM_001009984	A_23_P406122	C20orf194	chromosome 20 open reading frame 194	0.00110978	0.46237	-2.16277
NM_005218	A_23_P71480	DEFB1	defensin, beta 1	4.18034e-05	7.81011	7.81011
NM_017575	A_23_P4014	SMG6	smg-6 homolog, nonsense mediated mRNA decay factor (C. elegans)	0.000380232	0.479054	-2.08745
NM_001042476	A_23_P38085	CARHSP1	calcium regulated heat stable protein 1, 24kDa	5.9776e-05	0.453372	-2.2057
NM_001007094	A_24_P239668	ZNF37A	zinc finger protein 37A	0.000130688	2.15858	2.15858
ENST00000503803	A_24_P118211	SLC2A9	solute carrier family 2 (facilitated glucose transporter), member 9	0.00109476	2.8379	2.8379
NM_021979	A_23_P88303	HSPA2	heat shock 70kDa protein 2	0.000181503	2.71411	2.71411
NM_003544	A_24_P166407	HIST1H4B	histone cluster 1, H4b	5.86233e-05	0.12664	-7.89637
NM_007109	A_24_P349965	TCF19	transcription factor 19	5.15731e-05	0.257014	-3.89084
NM_002758	A_23_P207445	MAP2K6	mitogen-activated protein kinase kinase 6	1.68189e-05	0.165625	-6.03775
NM_003940	A_23_P40989	USP13	ubiquitin specific peptidase 13 (isopeptidase T-3)	1.11134e-05	0.387641	-2.57971
XM_006710169	?	?	?	0.000226326	2.70066	2.70066
NM_004062	A_23_P100240	CDH16	cadherin 16, KSP-cadherin	1.20563e-05	26.7318	26.7318
NM_020804	A_24_P149266	PACSIN1	protein kinase C and casein kinase substrate in neurons 1	0.000314119	0.423079	-2.36362
NM_005125	A_23_P127475	CCS	copper chaperone for superoxide dismutase	1.77076e-05	2.68991	2.68991
NM_003539	A_23_P395374	HIST1H4D	histone cluster 1, H4d	7.93249e-05	0.131035	-7.63155
NM_015084	A_23_P133332	MRPS27	mitochondrial ribosomal protein S27	8.55559e-06	0.375658	-2.662
NM_152409	A_24_P337504	C5orf24	chromosome 5 open reading frame 24	0.00105908	2.19849	2.19849
NM_017735	A_23_P131227	TTC27	tetratricopeptide repeat domain 27	1.18968e-05	0.308616	-3.24027
NM_016095	A_23_P118246	GINS2	GINS complex subunit 2 (Psf2 homolog)	3.54125e-05	0.21943	-4.55726
NM_002139	A_32_P56392	RBMX	RNA binding motif protein, X-linked	8.3469e-06	0.439438	-2.27564
ENST00000579052	?	?	?	4.78083e-05	3.60231	3.60231
NM_152505	A_32_P48466	LCA5L	Leber congenital amaurosis 5-like	0.000243458	4.34523	4.34523
NM_018441	A_23_P91140	PECR	peroxisomal trans-2-enoyl-CoA reductase	6.3373e-05	0.39702	-2.51877
A_24_P493116	?	?	?	1.29756e-06	0.47348	-2.11202
NM_006646	A_24_P176079	WASF3	WAS protein family, member 3	0.000180887	0.464347	-2.15356
AF009267	A_24_P636390			0.00294866	3.4542	3.4542
NM_015264	A_32_P88479	KIAA0930	KIAA0930	0.000545784	0.474261	-2.10854
BQ683489	A_32_P152348	HIST1H2BD	histone cluster 1, H2bd	0.000738891	0.392056	-2.55065
NM_018645	A_23_P131202	HES6	hairy and enhancer of split 6 (Drosophila)	1.24795e-05	4.67116	4.67116
A_32_P4608	?	?	?	4.63634e-05	0.38784	-2.57838
NM_022458	A_23_P300728	LMBR1	limb region 1 homolog (mouse)	7.98163e-06	0.354261	-2.82278
NM_001079537	A_24_P942132	TRAPPC6B	trafficking protein particle complex 6B	0.000142378	2.3576	2.3576
NM_004169	A_24_P205364	SHMT1	serine hydroxymethyltransferase 1 (soluble)	2.18679e-05	0.395478	-2.52858
NM_002375	A_24_P240242	MAP4	microtubule-associated protein 4	0.000192856	0.357581	-2.79657
NM_178428	A_23_P418006	LCE2A	late cornified envelope 2A	3.85463e-05	2.54413	2.54413
NM_178858	A_24_P175612	SFXN2	sideroflexin 2	7.28386e-05	0.320018	-3.12483
NM_018249	A_23_P83110	CDK5RAP2	CDK5 regulatory subunit associated protein 2	4.37011e-06	0.216553	-4.6178
A_23_P204225	?	?	?	0.000878322	0.407712	-2.45271
NM_007244	A_23_P76291	PRR4	proline rich 4 (lacrimal)	0.000135683	0.308385	-3.2427
NM_002263	A_23_P133956	KIFC1	kinesin family member C1	5.75645e-05	0.210438	-4.752
AK021845	A_23_P64217	MLL	myeloid/lymphoid or mixed-lineage leukemia (trithorax homolog, Drosophila)	0.00272077	2.54537	2.54537
NM_020199	A_23_P81650	C5orf15	chromosome 5 open reading frame 15	0.000542283	2.1005	2.1005
NM_032256	A_23_P2573	TMEM117	transmembrane protein 117	1.00941e-05	0.242933	-4.11636
NM_002111	A_24_P180225	HTT	huntingtin	0.000696582	0.450475	-2.21988
NM_006397	A_23_P164826	RNASEH2A	ribonuclease H2, subunit A	4.7479e-05	0.460636	-2.17091
NM_004925	A_23_P112482	AQP3	aquaporin 3 (Gill blood group)	1.50465e-05	4.16967	4.16967
A_24_P941540	?	?	?	0.000222195	0.400433	-2.4973
NM_006187	A_24_P335305	OAS3	2'-5'-oligoadenylate synthetase 3, 100kDa	9.8446e-05	0.46421	-2.1542
NM_001012410	A_23_P29723	SGOL1	shugoshin-like 1 (S. pombe)	1.59864e-05	0.402836	-2.4824
NR_024127	A_23_P74581	SNHG12	small nucleolar RNA host gene 12 (non-protein coding)	3.27644e-05	2.4201	2.4201
NM_000405	A_24_P925314	GM2A	GM2 ganglioside activator	8.6757e-06	4.65674	4.65674
CU677925	A_32_P115375			0.000136337	0.481162	-2.0783
NM_003621	A_23_P409623	PPFIBP2	PTPRF interacting protein, binding protein 2 (liprin beta 2)	9.19594e-05	0.276059	-3.62242
NM_000156	A_23_P108143	GAMT	guanidinoacetate N-methyltransferase	2.30089e-05	3.74787	3.74787
NM_004260	A_23_P71558	RECQL4	RecQ protein-like 4	0.000146604	0.304719	-3.28171
NM_014668	A_23_P329768	GREB1	growth regulation by estrogen in breast cancer 1	0.000224732	0.178451	-5.60378
NM_016337	A_23_P140427	EVL	Enah/Vasp-like	0.000340456	0.259951	-3.84688
NM_025108	A_23_P26557	C16orf59	chromosome 16 open reading frame 59	6.63775e-05	0.480186	-2.08252
NM_139160	A_23_P385126	DEPDC7	DEP domain containing 7	0.000154649	3.86826	3.86826
NM_202002	A_23_P151150	FOXM1	forkhead box M1	9.57057e-05	0.192135	-5.20467
NM_152308	A_23_P353717	RMI2	RMI2, RecQ mediated genome instability 2, homolog (S. cerevisiae)	9.10559e-05	0.498385	-2.00648
NM_002959	A_24_P325520	SORT1	sortilin 1	8.64697e-06	0.477099	-2.096
NM_014943	A_23_P168951	ZHX2	zinc fingers and homeoboxes 2	0.000107135	0.2266	-4.41306
NM_014042	A_24_P244410	C11orf51	chromosome 11 open reading frame 51	4.90134e-05	0.382646	-2.61338
XM_006709955	?	?	?	4.57874e-05	0.13808	-7.24218
NM_002466	A_23_P143190	MYBL2	v-myb myeloblastosis viral oncogene homolog (avian)-like 2	8.63326e-05	0.16948	-5.90039
BX106478	?	?	?	0.0010503	0.489896	-2.04125
NM_022114	A_32_P225816	PRDM16	PR domain containing 16	0.000960242	0.262244	-3.81324
NM_015014	A_24_P418086	RBM34	RNA binding motif protein 34	0.0025101	2.03897	2.03897
TCONS_l2_00003697	?	?	?	9.94966e-05	2.04497	2.04497
NM_001039362	A_24_P276932	ATP6V1C2	ATPase, H+ transporting, lysosomal 42kDa, V1 subunit C2	0.000172919	0.280629	-3.56342
A_24_P565908	?	?	?	5.42218e-05	0.360858	-2.77117
NR_029422	A_24_P23445	RNU12	RNA, U12 small nuclear	4.98151e-05	0.193565	-5.16621
NM_198194	A_24_P141214	STOM	stomatin	0.000260136	2.07889	2.07889
NM_001185095	A_23_P94380	AIF1L	allograft inflammatory factor 1-like	5.95278e-05	0.332072	-3.0114
NM_018306	A_23_P29551	TMEM40	transmembrane protein 40	5.8111e-05	11.8178	11.8178
NM_173575	A_24_P64329	STK32C	serine/threonine kinase 32C	0.000346323	0.307488	-3.25216
NM_001015002	A_24_P307869	LLGL2	lethal giant larvae homolog 2 (Drosophila)	0.00018219	0.474869	-2.10585
NM_030760	A_23_P107750	S1PR5	sphingosine-1-phosphate receptor 5	0.000866446	0.319797	-3.12698
NM_177967	A_23_P139998	UBAC2	UBA domain containing 2	9.39082e-05	0.365576	-2.73541
NM_002726	A_23_P133755	PREP	prolyl endopeptidase	0.000135372	0.492812	-2.02917
ENST00000495461	A_32_P173177			9.95843e-05	2.20664	2.20664
NM_002757	A_24_P356130	MAP2K5	mitogen-activated protein kinase kinase 5	6.06342e-05	0.249739	-4.00418
NM_152943	A_23_P255591	ZNF268	zinc finger protein 268	0.00170024	4.22846	4.22846
A_24_P127192	?	?	?	5.72892e-05	0.430171	-2.32466
NM_080759	A_23_P32577	DACH1	dachshund homolog 1 (Drosophila)	1.93692e-05	0.0776468	-12.8788
XM_006724139	?	?	?	4.02823e-05	0.383969	-2.60438
NM_005573	A_23_P258493	LMNB1	lamin B1	4.61307e-05	0.142088	-7.03791
NM_022365	A_23_P127128	DNAJC1	DnaJ (Hsp40) homolog, subfamily C, member 1	8.57898e-06	0.367072	-2.72426
NM_001042369	A_24_P222684	TROVE2	TROVE domain family, member 2	0.006298	3.31636	3.31636
NM_145886	A_32_P117145	PIDD	p53-induced death domain protein	1.46582e-05	9.09279	9.09279
NM_181876	A_24_P3415	PPP2R2C	protein phosphatase 2, regulatory subunit B, gamma	0.000179274	0.401395	-2.49131
NM_000232	A_23_P251104	SGCB	sarcoglycan, beta (43kDa dystrophin-associated glycoprotein)	5.95021e-05	2.12532	2.12532
NM_001282755	?	?	?	0.000204949	0.341101	-2.93168
NM_172037	A_32_P25050	RDH10	retinol dehydrogenase 10 (all-trans)	1.54825e-05	2.51886	2.51886
TCONS_l2_00017601	?	?	?	5.42073e-05	6.84914	6.84914
NM_014732	A_23_P206310	KIAA0513	KIAA0513	7.33134e-06	3.96899	3.96899
NM_015994	A_23_P140115	ATP6V1D	ATPase, H+ transporting, lysosomal 34kDa, V1 subunit D	0.0025592	2.47001	2.47001
NM_005539	A_24_P26897	INPP5A	inositol polyphosphate-5-phosphatase, 40kDa	9.69696e-05	0.440197	-2.27171
NM_004327	A_32_P56713	BCR	breakpoint cluster region	0.000871788	0.4535	-2.20507
NM_194325	A_32_P203430	ZNF30	zinc finger protein 30	0.000465839	3.75037	3.75037
A_24_P75408	?	?	?	0.000360995	0.37671	-2.65456
NM_004225	A_23_P112078	MFHAS1	malignant fibrous histiocytoma amplified sequence 1	0.000822497	0.363548	-2.75067
NM_020244	A_23_P105571	CHPT1	choline phosphotransferase 1	3.62586e-05	0.25618	-3.9035
NM_017955	A_24_P133488	CDCA4	cell division cycle associated 4	0.000191259	0.416457	-2.40121
NM_004071	A_24_P257151	CLK1	CDC-like kinase 1	0.000226348	3.586	3.586
A_24_P237686	?	?	?	6.48267e-05	0.290489	-3.44247
NM_002125	A_23_P45099	HLA-DRB5	major histocompatibility complex, class II, DR beta 5	6.56772e-05	0.196808	-5.0811
NM_024908	A_23_P129075	WDR76	WD repeat domain 76	5.07332e-05	0.172831	-5.786
S69023	A_24_P933151	HOXB6	homeobox B6	0.000388344	0.474632	-2.1069
NM_015226	A_32_P194246	CLEC16A	C-type lectin domain family 16, member A	0.000204748	0.413295	-2.41958
NM_014475	A_23_P67367	DHDH	dihydrodiol dehydrogenase (dimeric)	6.37578e-05	5.53306	5.53306
NM_002737	A_24_P916496	PRKCA	protein kinase C, alpha	0.000227395	0.298955	-3.34499
NM_012339	A_32_P7015	TSPAN15	tetraspanin 15	0.000119676	0.325593	-3.07132
THC2753682	A_32_P20141			0.000306363	2.48519	2.48519
NM_001004301	A_32_P3998	ZNF813	zinc finger protein 813	0.00179372	3.15328	3.15328
NM_017425	A_23_P104876	SPA17	sperm autoantigenic protein 17	2.56445e-05	0.431773	-2.31603
NM_031477	A_23_P15108	YPEL3	yippee-like 3 (Drosophila)	5.61741e-05	5.76713	5.76713
NM_152516	A_32_P131562	COMMD1	copper metabolism (Murr1) domain containing 1	8.3624e-05	0.437969	-2.28327
NM_020644	A_24_P398319	TMEM9B	TMEM9 domain family, member B	5.40342e-05	2.47276	2.47276
NM_002928	A_23_P320578	RGS16	regulator of G-protein signaling 16	5.98491e-05	2.55295	2.55295
NM_002335	A_23_P1505	LRP5	low density lipoprotein receptor-related protein 5	0.000463097	0.379259	-2.63672
NM_007185	A_23_P337849	CELF3	CUGBP, Elav-like family member 3	3.68611e-05	6.48807	6.48807
NM_001040874	A_23_P309381	HIST2H2AA4	histone cluster 2, H2aa4	2.02911e-05	2.86758	2.86758
NM_207435	A_23_P410312	C12orf76	chromosome 12 open reading frame 76	1.24702e-05	3.74459	3.74459
NM_001037537	A_23_P115919	PHYH	phytanoyl-CoA 2-hydroxylase	0.000147556	2.72185	2.72185
NM_201263	A_23_P74380	WARS2	tryptophanyl tRNA synthetase 2, mitochondrial	0.000285058	0.401372	-2.49145
NM_138375	A_23_P422851	CABLES1	Cdk5 and Abl enzyme substrate 1	0.000386049	0.197833	-5.05477
NM_001809	A_24_P413884	CENPA	centromere protein A	5.07245e-05	0.209347	-4.77675
NM_145012	A_23_P300905	CCNY	cyclin Y	2.08222e-05	0.31981	-3.12686
THC2510656	?	?	?	0.00160094	2.38549	2.38549
NM_020931	A_24_P230965	KIAA1586	KIAA1586	0.000217706	5.2187	5.2187
NM_002633	A_23_P52031	PGM1	phosphoglucomutase 1	7.02518e-05	0.421121	-2.37461
A_32_P45727	?	?	?	5.69328e-05	7.20123	7.20123
NM_012140	A_23_P146830	SLC25A10	solute carrier family 25 (mitochondrial carrier; dicarboxylate transporter), member 10	0.000173366	0.352611	-2.83599
NM_005414	A_32_P63086	SKIL	SKI-like oncogene	0.00223799	3.52348	3.52348
NM_002198	A_23_P41765	IRF1	interferon regulatory factor 1	1.98447e-05	3.36062	3.36062
A_23_P50195	?	?	?	0.00131016	3.276	3.276
NM_017815	A_23_P65455	HAUS4	HAUS augmin-like complex, subunit 4	6.16253e-05	0.388559	-2.57361
NM_005928	A_24_P133584	MFGE8	milk fat globule-EGF factor 8 protein	2.55984e-05	6.99648	6.99648
A_32_P136588	?	?	?	0.000145883	0.389381	-2.56818
NM_001195032	A_23_P257497	C6orf99	chromosome 6 open reading frame 99	0.000292927	0.438738	-2.27927
NM_015723	A_24_P85045	PNPLA8	patatin-like phospholipase domain containing 8	0.00391329	2.49727	2.49727
NM_005639	A_23_P36795	SYT1	synaptotagmin I	1.2915e-05	0.159281	-6.2782
NM_002668	A_24_P74932	PLP2	proteolipid protein 2 (colonic epithelium-enriched)	0.000157862	0.375521	-2.66296
BC032312	A_24_P931636	TBRG1	transforming growth factor beta regulator 1	0.00203356	2.12644	2.12644
NM_022802	A_32_P144708	CTBP2	C-terminal binding protein 2	1.65672e-05	0.345846	-2.89146
NM_005329	A_23_P393034	HAS3	hyaluronan synthase 3	2.72818e-05	9.7178	9.7178
NM_147150	A_23_P342654	PALM2-AKAP2	PALM2-AKAP2 readthrough	3.19608e-05	2.25095	2.25095
NM_173685	A_23_P422794	NSMCE2	non-SMC element 2, MMS21 homolog (S. cerevisiae)	2.03329e-05	0.279426	-3.57877
NM_001221	A_32_P47988	CAMK2D	calcium/calmodulin-dependent protein kinase II delta	2.44052e-06	0.294033	-3.40098
NM_024066	A_32_P155416	ERI3	ERI1 exoribonuclease family member 3	8.71065e-05	0.339683	-2.94392
NM_152493	A_23_P137543	ZNF362	zinc finger protein 362	0.000829301	0.473417	-2.1123
NM_005439	A_23_P13873	MLF2	myeloid leukemia factor 2	3.4731e-05	2.33243	2.33243
NM_001008392	A_24_P251534	CTDSPL	CTD (carboxy-terminal domain, RNA polymerase II, polypeptide A) small phosphatase-like	0.000164569	0.221868	-4.50717
NM_012254	A_23_P4611	SLC27A5	solute carrier family 27 (fatty acid transporter), member 5	9.3246e-05	0.410361	-2.43688
BC002724	A_24_P914479	SNX5	sorting nexin 5	0.00156588	2.09386	2.09386
THC2580690	A_32_P28480			0.00184879	2.06471	2.06471
NM_006425	A_24_P377328	SLU7	SLU7 splicing factor homolog (S. cerevisiae)	0.00130405	3.097	3.097
NM_006393	A_24_P398147	NEBL	nebulette	2.10388e-05	0.288515	-3.46602
NM_018304	A_23_P207301	PRR11	proline rich 11	3.10611e-05	0.484623	-2.06346
NM_021947	A_23_P141248	SRR	serine racemase	8.21954e-05	0.487276	-2.05223
NM_138328	A_23_P308731	RHBDL3	rhomboid, veinlet-like 3 (Drosophila)	0.000196308	0.279291	-3.58049
NM_145290	A_23_P158933	GPR125	G protein-coupled receptor 125	0.000149553	0.428296	-2.33483
NM_030796	A_23_P168211	VOPP1	vesicular, overexpressed in cancer, prosurvival protein 1	3.26925e-05	0.48593	-2.05791
NM_001145358	A_24_P304760	SIN3A	SIN3 homolog A, transcription regulator (yeast)	9.173e-05	0.491211	-2.03579
NM_000926	A_32_P49199	PGR	progesterone receptor	7.85105e-06	0.201609	-4.9601
NM_001030006	A_24_P253827	AP2B1	adaptor-related protein complex 2, beta 1 subunit	7.33522e-05	0.414593	-2.41201
NM_001352	A_23_P130753	DBP	D site of albumin promoter (albumin D-box) binding protein	0.000374378	0.336056	-2.9757
NR_110589	?	?	?	0.00170656	0.496931	-2.01235
NM_001006617	A_24_P43884	MAPKAP1	mitogen-activated protein kinase associated protein 1	5.18635e-05	0.235373	-4.24857
NM_015426	A_24_P354300	POC1A	POC1 centriolar protein homolog A (Chlamydomonas)	8.09142e-05	0.376103	-2.65885
NM_001146695	A_24_P605233	KDM4C	lysine (K)-specific demethylase 4C	0.000174702	0.212671	-4.70209
NM_178508	A_23_P81993	C6orf1	chromosome 6 open reading frame 1	1.28076e-05	2.53678	2.53678
NM_001042507	A_24_P348118	LGALS7B	lectin, galactoside-binding, soluble, 7B	5.14095e-05	9.62667	9.62667
NM_015335	A_24_P911508	MED13L	mediator complex subunit 13-like	9.93296e-05	0.22044	-4.53638
ENST00000606641	?	?	?	0.000337746	3.4781	3.4781
NM_000665	A_24_P60845	ACHE	acetylcholinesterase	3.78863e-05	3.0538	3.0538
THC2659504	?	?	?	0.000563756	0.305556	-3.27272
THC2686813	A_32_P233834			0.00921137	0.394624	-2.53406
NM_017572	A_23_P142310	MKNK2	MAP kinase interacting serine/threonine kinase 2	8.71296e-06	3.05499	3.05499
NM_005667	A_23_P56709	RNF103	ring finger protein 103	0.00019673	2.53123	2.53123
NM_002499	A_23_P14798	NEO1	neogenin 1	0.00111753	0.430272	-2.32411
AL832861	A_32_P232704	MTERF	mitochondrial transcription termination factor	0.00680217	3.9211	3.9211
NM_014671	A_24_P265135	UBE3C	ubiquitin protein ligase E3C	7.8785e-05	0.497571	-2.00976
NM_022121	A_23_P214950	PERP	PERP, TP53 apoptosis effector	0.000196116	2.40633	2.40633
THC2683231	A_32_P101653			4.62314e-05	3.88436	3.88436
NM_014672	A_23_P14340	KIAA0391	KIAA0391	7.60253e-06	0.385302	-2.59537
NM_001170330	A_23_P388433	C4orf3	chromosome 4 open reading frame 3	0.000507388	2.72883	2.72883
NM_015975	A_24_P391431	TAF9B	TAF9B RNA polymerase II, TATA box binding protein (TBP)-associated factor, 31kDa	0.00745798	3.06099	3.06099
NM_015655	A_24_P318939	ZNF337	zinc finger protein 337	5.28666e-05	2.03178	2.03178
NM_001031709	A_23_P202501	RNLS	renalase, FAD-dependent amine oxidase	2.73811e-05	0.185957	-5.37759
NM_001080489	A_23_P95619	GLOD5	glyoxalase domain containing 5	0.000528131	0.424969	-2.35311
NM_006048	A_23_P201279	UBE4B	ubiquitination factor E4B	7.55391e-05	0.286053	-3.49585
NM_012310	A_23_P148475	KIF4A	kinesin family member 4A	3.68285e-05	0.147189	-6.79398
NM_145276	A_23_P107881	ZNF563	zinc finger protein 563	0.000138116	5.58775	5.58775
NM_001267560	?	?	?	0.000125956	0.296412	-3.37369
NM_001790	A_23_P70249	CDC25C	cell division cycle 25 homolog C (S. pombe)	5.13783e-05	0.200127	-4.99682
NM_012425	A_23_P149813	RSU1	Ras suppressor protein 1	3.10009e-05	0.408857	-2.44584
NM_001860	A_23_P217109	SLC31A2	solute carrier family 31 (copper transporters), member 2	6.96363e-06	3.23304	3.23304
NM_006845	A_23_P34788	KIF2C	kinesin family member 2C	3.85137e-05	0.211809	-4.72124
NM_000416	A_23_P8281	IFNGR1	interferon gamma receptor 1	0.00092546	2.83492	2.83492
NM_017740	A_24_P373297	ZDHHC7	zinc finger, DHHC-type containing 7	8.52392e-06	2.04831	2.04831
NM_018262	A_23_P212447	IFT122	intraflagellar transport 122 homolog (Chlamydomonas)	0.000198336	0.447267	-2.2358
NM_005480	A_23_P150935	TROAP	trophinin associated protein (tastin)	0.000223823	0.1908	-5.24109
NM_032875	A_23_P141146	FBXL20	F-box and leucine-rich repeat protein 20	0.000232949	0.332518	-3.00736
BC014534	A_23_P142537	MBD5	methyl-CpG binding domain protein 5	3.18621e-05	0.19926	-5.01857
NM_052972	A_23_P50638	LRG1	leucine-rich alpha-2-glycoprotein 1	0.000113053	0.172905	-5.78353
NM_032312	A_23_P424080	YIPF4	Yip1 domain family, member 4	0.00146038	3.08415	3.08415
NM_001025248	A_24_P160874	DUT	deoxyuridine triphosphatase	4.36087e-05	0.473696	-2.11106
NM_006342	A_23_P212844	TACC3	transforming, acidic coiled-coil containing protein 3	0.000114071	0.264642	-3.77869
NM_021220	A_23_P143348	OVOL2	ovo-like 2 (Drosophila)	0.00010899	0.0574263	-17.4136
NM_024552	A_23_P153867	CERS4	ceramide synthase 4	0.0001653	0.353035	-2.83258
THC2552322	?	?	?	0.000395847	0.204332	-4.89399
NM_080668	A_23_P104651	CDCA5	cell division cycle associated 5	9.04322e-05	0.403088	-2.48085
AK094842	A_24_P83462	C9orf47	chromosome 9 open reading frame 47	0.000316862	2.81158	2.81158
NM_198839	A_32_P215318	ACACA	acetyl-CoA carboxylase alpha	0.000692254	0.484905	-2.06226
NM_014454	A_24_P346339	SESN1	sestrin 1	0.000113682	4.28588	4.28588
NM_001136263	A_32_P82895	C2CD4C	C2 calcium-dependent domain containing 4C	0.000637429	0.292576	-3.41792
NM_001967	A_32_P110751	EIF4A2	eukaryotic translation initiation factor 4A2	0.000192494	2.47449	2.47449
NM_000135	A_23_P206441	FANCA	Fanconi anemia, complementation group A	0.000863048	0.374458	-2.67052
NM_018099	A_23_P150903	FAR2	fatty acyl CoA reductase 2	1.80956e-05	0.245046	-4.08086
NM_198457	A_24_P178602	ZNF600	zinc finger protein 600	0.00193751	3.64386	3.64386
A_32_P152696	?	?	?	0.000272699	0.280486	-3.56524
NM_005625	A_23_P157580	SDCBP	syndecan binding protein (syntenin)	0.001581	2.94064	2.94064
A_32_P57775	?	?	?	0.00071085	0.375446	-2.6635
NM_005258	A_23_P77328	GCHFR	GTP cyclohydrolase I feedback regulator	0.000241754	0.438166	-2.28224
NM_001078170	A_32_P108544	RGPD2	RANBP2-like and GRIP domain containing 2	0.00120652	4.04617	4.04617
NM_014398	A_23_P29773	LAMP3	lysosomal-associated membrane protein 3	1.58337e-05	10.884	10.884
NM_015196	A_24_P102434	KIAA0922	KIAA0922	0.000160244	0.350749	-2.85104
NM_016292	A_23_P3849	TRAP1	TNF receptor-associated protein 1	0.000193712	0.426308	-2.34572
NM_018218	A_24_P314688	USP40	ubiquitin specific peptidase 40	6.64028e-05	0.479737	-2.08447
NM_016732	A_23_P109235	RALY	RNA binding protein, autoantigenic (hnRNP-associated with lethal yellow homolog (mouse))	0.000224209	0.396747	-2.5205
THC2608799	A_32_P77252			7.62156e-06	2.98594	2.98594
NM_003628	A_23_P16992	PKP4	plakophilin 4	4.2291e-05	0.311224	-3.21312
NM_006395	A_24_P944827	ATG7	ATG7 autophagy related 7 homolog (S. cerevisiae)	0.000148891	0.247298	-4.0437
NM_001102559	A_23_P322845	PPAPDC1B	phosphatidic acid phosphatase type 2 domain containing 1B	0.000264812	3.11915	3.11915
NM_002916	A_23_P18196	RFC4	replication factor C (activator 1) 4, 37kDa	5.12819e-05	0.410636	-2.43524
NM_005000	A_32_P96641	NDUFA5	NADH dehydrogenase (ubiquinone) 1 alpha subcomplex, 5, 13kDa	0.00939034	2.08716	2.08716
NM_005993	A_24_P275873	TBCD	tubulin folding cofactor D	0.00045153	0.452117	-2.21182
NM_078626	A_23_P85460	CDKN2C	cyclin-dependent kinase inhibitor 2C (p18, inhibits CDK4)	0.000123401	0.269306	-3.71324
NM_001987	A_24_P372862	ETV6	ets variant 6	0.00206497	0.304444	-3.28468
BC004565	A_23_P253762			0.00162505	0.265325	-3.76897
NM_003156	A_23_P53162	STIM1	stromal interaction molecule 1	0.000440326	0.376702	-2.65462
NM_001242701	A_24_P302406	CAMTA1	calmodulin binding transcription activator 1	0.000114606	0.387621	-2.57984
NM_032119	A_23_P19134	GPR98	G protein-coupled receptor 98	1.85684e-05	0.265806	-3.76215
NM_173471	A_24_P368544	SLC25A26	solute carrier family 25, member 26	0.000207664	0.343012	-2.91535
NM_133491	A_23_P15402	SAT2	spermidine/spermine N1-acetyltransferase family member 2	2.2812e-05	2.25376	2.25376
NR_027790	A_32_P188953	LINC00478	long intergenic non-protein coding RNA 478	7.53961e-06	0.321109	-3.1142
NM_001826	A_32_P206698	CKS1B	CDC28 protein kinase regulatory subunit 1B	0.000161659	0.489235	-2.04401
NM_032276	A_24_P134834	RHBDD1	rhomboid domain containing 1	0.000293932	0.404998	-2.46915
NM_001145712	A_32_P42964	LOC389493	uncharacterized LOC389493	3.42486e-05	2.79653	2.79653
NM_021721	A_24_P243741	ADAM22	ADAM metallopeptidase domain 22	4.59586e-06	0.347072	-2.88125
NM_001164458	A_24_P76635	ACTR3C	ARP3 actin-related protein 3 homolog C (yeast)	0.000154664	0.28244	-3.54057
NR_003608	A_24_P259154	MGC16703	tubulin, alpha pseudogene	0.000391584	0.339406	-2.94633
NM_001271466	?	?	?	0.00120342	0.336326	-2.9733
NM_152586	A_24_P914155	USP54	ubiquitin specific peptidase 54	0.000226055	0.428485	-2.3338
NM_003325	A_23_P154938	HIRA	HIR histone cell cycle regulation defective homolog A (S. cerevisiae)	0.000983342	0.355207	-2.81526
NM_004217	A_23_P130182	AURKB	aurora kinase B	0.000147907	0.190664	-5.24483
NM_001303	A_23_P55123	COX10	COX10 homolog, cytochrome c oxidase assembly protein, heme A: farnesyltransferase (yeast)	0.000150033	0.343383	-2.9122
NM_017736	A_24_P99371	THUMPD1	THUMP domain containing 1	0.0038593	4.1224	4.1224
NM_182603	A_32_P69166	ANKRD42	ankyrin repeat domain 42	0.000144122	2.49799	2.49799
NM_080476	A_24_P457912	PIGU	phosphatidylinositol glycan anchor biosynthesis, class U	0.000170684	0.355657	-2.81169
A_32_P201792	?	?	?	0.000452732	0.499614	-2.00154
NM_004882	A_23_P39814	CIR1	corepressor interacting with RBPJ, 1	0.00674237	2.77197	2.77197
ENST00000395009	A_24_P410657	CDKN2AIPNL	CDKN2A interacting protein N-terminal like	7.87611e-05	2.03968	2.03968
NM_016321	A_23_P151975	RHCG	Rh family, C glycoprotein	2.92758e-05	5.74797	5.74797
NM_181334	A_23_P91783	PRR5-ARHGAP8	PRR5-ARHGAP8 readthrough	0.000214964	0.365445	-2.73639
AL133642	A_24_P942648	EVL	Enah/Vasp-like	0.000568691	0.304723	-3.28167
NM_001284246	?	?	?	0.000440666	0.319154	-3.13329
A_24_P170025	?	?	?	0.00197734	3.08864	3.08864
NM_178448	A_24_P100517	C9orf140	chromosome 9 open reading frame 140	0.000444532	0.255306	-3.91687
A_24_P152144	?	?	?	0.00210986	0.434926	-2.29924
A_24_P152845	?	?	?	7.38726e-05	3.30124	3.30124
NM_002194	A_32_P44453	INPP1	inositol polyphosphate-1-phosphatase	1.05593e-05	4.4903	4.4903
NM_145080	A_23_P95823	NSMCE1	non-SMC element 1 homolog (S. cerevisiae)	8.02443e-05	0.477928	-2.09236
AK022379	A_24_P740662	B2M	beta-2-microglobulin	0.0017858	2.26613	2.26613
NM_003371	A_24_P84419	VAV2	vav 2 guanine nucleotide exchange factor	0.00141075	0.499853	-2.00059
NM_015059	A_32_P170406	TLN2	talin 2	0.000393507	0.252575	-3.95922
NM_003279	A_23_P131825	TNNC2	troponin C type 2 (fast)	4.23136e-05	4.65893	4.65893
NM_005765	A_23_P11353	ATP6AP2	ATPase, H+ transporting, lysosomal accessory protein 2	0.000601863	2.30468	2.30468
NM_000875	A_23_P417282	IGF1R	insulin-like growth factor 1 receptor	0.000818863	0.281518	-3.55217
NM_002467	A_24_P38363	MYC	v-myc myelocytomatosis viral oncogene homolog (avian)	0.00492612	0.465408	-2.14865
NM_001032372	A_24_P930347	ZNF226	zinc finger protein 226	0.000983309	3.05182	3.05182
NM_001017395	A_32_P41070	TMCC1	transmembrane and coiled-coil domain family 1	0.000551737	0.337036	-2.96704
NM_001124	A_23_P127948	ADM	adrenomedullin	0.000386782	2.92287	2.92287
NM_001009955	A_24_P375453	SSBP3	single stranded DNA binding protein 3	0.000136981	0.469228	-2.13116
NM_001039846	A_24_P32295	IZUMO4	IZUMO family member 4	0.000114023	3.09547	3.09547
NM_032523	A_23_P108823	OSBPL6	oxysterol binding protein-like 6	5.95575e-05	0.354832	-2.81823
NM_133463	A_24_P383649	AMZ1	archaelysin family metallopeptidase 1	0.00159059	0.27525	-3.63306
AL110237	A_32_P135007			0.000337388	0.460543	-2.17135
NM_004347	A_23_P47304	CASP5	caspase 5, apoptosis-related cysteine peptidase	9.47928e-05	2.22344	2.22344
NM_001001701	A_24_P391987	C4orf3	chromosome 4 open reading frame 3	0.00112842	2.25588	2.25588
NM_004930	A_23_P126752	CAPZB	capping protein (actin filament) muscle Z-line, beta	3.33455e-05	0.399214	-2.50492
A_32_P37584	?	?	?	0.00266094	4.5523	4.5523
NM_002687	A_23_P99582	PNN	pinin, desmosome associated protein	0.0090906	2.37161	2.37161
NM_012156	A_24_P185709	EPB41L1	erythrocyte membrane protein band 4.1-like 1	0.000711486	0.41231	-2.42536
NM_001040694	A_23_P116387	INCENP	inner centromere protein antigens 135/155kDa	0.000778118	0.218171	-4.58355
NM_005872	A_23_P34930	BCAS2	breast carcinoma amplified sequence 2	0.00599986	2.36882	2.36882
ENST00000488618	A_24_P935026	STK4	serine/threonine kinase 4	0.0066261	3.31319	3.31319
NM_014061	A_23_P34144	MAGEH1	melanoma antigen family H, 1	3.90125e-05	2.19878	2.19878
NM_007054	A_23_P122027	KIF3A	kinesin family member 3A	0.00143664	3.69267	3.69267
NM_182643	A_24_P940115	DLC1	deleted in liver cancer 1	0.00648209	0.428704	-2.33261
NM_017982	A_24_P259607	SUSD4	sushi domain containing 4	0.000122876	0.321443	-3.11097
NM_021235	A_23_P38941	EPS15L1	epidermal growth factor receptor pathway substrate 15-like 1	0.000227219	0.438821	-2.27884
NM_002204	A_23_P55251	ITGA3	integrin, alpha 3 (antigen CD49C, alpha 3 subunit of VLA-3 receptor)	1.76798e-05	3.88329	3.88329
NM_018101	A_23_P375	CDCA8	cell division cycle associated 8	0.000194868	0.353447	-2.82928
NM_199424	A_23_P357147	WWP2	WW domain containing E3 ubiquitin protein ligase 2	0.000781566	0.384287	-2.60222
NM_182915	A_24_P200000	STEAP3	STEAP family member 3, metalloreductase	1.36699e-05	2.51157	2.51157
NM_024844	A_23_P26777	NUP85	nucleoporin 85kDa	9.33635e-05	0.424872	-2.35365
NM_148894	A_24_P264928	BOD1L	biorientation of chromosomes in cell division 1-like	0.0032182	3.80215	3.80215
NM_014607	A_32_P95823	UBXN4	UBX domain protein 4	0.00427617	2.10399	2.10399
NM_003501	A_24_P354451	ACOX3	acyl-CoA oxidase 3, pristanoyl	0.000460209	0.481037	-2.07884
A_32_P182070	?	?	?	0.000120617	0.428919	-2.33144
NM_005797	A_24_P278552	MPZL2	myelin protein zero-like 2	0.000393333	3.4412	3.4412
NM_020744	A_23_P154522	MTA3	metastasis associated 1 family, member 3	4.76038e-05	0.42798	-2.33656
M27126	A_24_P845223			0.000157621	0.183395	-5.4527
NM_178155	A_23_P313632	FUT8	fucosyltransferase 8 (alpha (1,6) fucosyltransferase)	1.86106e-05	0.251874	-3.97023
NM_174931	A_24_P358425	CCDC75	coiled-coil domain containing 75	0.00441241	2.18498	2.18498
NM_006103	A_24_P14464	WFDC2	WAP four-disulfide core domain 2	2.98197e-05	6.50552	6.50552
NM_002691	A_23_P50456	POLD1	polymerase (DNA directed), delta 1, catalytic subunit 125kDa	0.000482696	0.427718	-2.33799
NM_002560	A_23_P53623	P2RX4	purinergic receptor P2X, ligand-gated ion channel, 4	0.000275708	0.332546	-3.0071
BC012185	A_32_P794894	HIST1H3G	histone cluster 1, H3g	0.000172121	0.261868	-3.81871
NM_004760	A_24_P337796	STK17A	serine/threonine kinase 17a	0.000572716	2.83104	2.83104
NM_017633	A_23_P70660	FAM46A	family with sequence similarity 46, member A	0.000849191	3.98082	3.98082
A_24_P118721	?	?	?	0.000920919	2.24331	2.24331
BC041389	?	?	?	0.00173323	0.400152	-2.49905
NM_018237	A_23_P115842	CCAR1	cell division cycle and apoptosis regulator 1	0.00727309	2.27787	2.27787
NM_001003828	A_23_P40718	PARVB	parvin, beta	0.000311062	0.334498	-2.98955
NM_000123	A_23_P117225	ERCC5	excision repair cross-complementing rodent repair deficiency, complementation group 5	0.00214456	2.3117	2.3117
NM_006705	A_24_P120934	GADD45G	growth arrest and DNA-damage-inducible, gamma	0.000305959	3.60718	3.60718
NM_019016	A_23_P4387	KRT24	keratin 24	2.37911e-05	0.40097	-2.49395
NR_033748	A_24_P152649	LOC644189	acyl-CoA thioesterase 4 pseudogene	0.000284178	0.367198	-2.72333
NM_005491	A_23_P251075	MAMLD1	mastermind-like domain containing 1	0.0041047	0.336311	-2.97344
ENST00000592540	?	?	?	0.000360913	0.247651	-4.03794
NM_022091	A_23_P382654	ASCC3	activating signal cointegrator 1 complex subunit 3	0.00127723	4.06536	4.06536
NM_031916	A_32_P335921	ROPN1L	rhophilin associated tail protein 1-like	6.95698e-06	2.56525	2.56525
AL833696	A_32_P34926			2.59689e-05	3.62005	3.62005
NM_004153	A_23_P45799	ORC1	origin recognition complex, subunit 1	0.000176367	0.177657	-5.62881
NM_152417	A_32_P15464	TMEM68	transmembrane protein 68	0.00066445	2.03463	2.03463
NM_017913	A_23_P20558	CDC37L1	cell division cycle 37 homolog (S. cerevisiae)-like 1	0.00276623	2.55952	2.55952
NM_021005	A_24_P313354	NR2F2	nuclear receptor subfamily 2, group F, member 2	0.000372822	0.453225	-2.20641
BC011660	A_32_P30558			0.000449801	0.34564	-2.89318
NM_152362	A_23_P428875	TNFAIP8L1	tumor necrosis factor, alpha-induced protein 8-like 1	0.000733231	0.148597	-6.7296
NM_017847	A_32_P148824	C1orf27	chromosome 1 open reading frame 27	0.00834304	3.14292	3.14292
NM_173200	A_23_P398566	NR4A3	nuclear receptor subfamily 4, group A, member 3	2.40324e-05	8.13576	8.13576
NM_152331	A_23_P14515	ACOT4	acyl-CoA thioesterase 4	0.00030144	0.366147	-2.73114
A_32_P159289	?	?	?	0.00233366	0.296105	-3.37718
THC2658419	A_32_P41099			0.000887072	3.07306	3.07306
NM_001769	A_23_P76364	CD9	CD9 molecule	3.02107e-05	0.495561	-2.01792
A_32_P34064	?	?	?	0.0070488	2.26906	2.26906
NM_006969	A_24_P282043	ZNF28	zinc finger protein 28	0.00696134	4.10917	4.10917
NM_005319	A_23_P122443	HIST1H1C	histone cluster 1, H1c	3.01884e-05	2.95638	2.95638
NR_038310	A_32_P226907	MIR497HG	mir-497-195 cluster host gene (non-protein coding)	0.000739817	0.445409	-2.24513
A_24_P383934	?	?	?	0.00107963	0.494951	-2.0204
NM_173465	A_23_P387031	COL23A1	collagen, type XXIII, alpha 1	0.00249263	0.416634	-2.40019
NR_026777	A_32_P48043	ZNF37BP	zinc finger protein 37B, pseudogene	0.0026868	3.96799	3.96799
NM_017644	A_24_P521994	KLHL24	kelch-like 24 (Drosophila)	0.000406191	3.61556	3.61556
NM_183241	A_23_P312646	C9orf142	chromosome 9 open reading frame 142	0.000122268	0.416544	-2.40071
NM_001039580	A_32_P50066	MAP9	microtubule-associated protein 9	0.00470249	5.38649	5.38649
BU567832	A_32_P118325			0.000733225	5.39794	5.39794
NM_001145364	A_23_P362712	ABHD11	abhydrolase domain containing 11	0.000444957	0.452288	-2.21098
NM_016038	A_32_P177024	SBDS	Shwachman-Bodian-Diamond syndrome	0.00294899	2.21914	2.21914
NM_152289	A_32_P113114	ZNF561	zinc finger protein 561	0.000193543	2.66728	2.66728
NM_198480	A_24_P190345	ZNF615	zinc finger protein 615	0.000985635	2.29319	2.29319
NM_207459	A_23_P375165	TEX19	testis expressed 19	0.00206833	0.319028	-3.13452
NM_018410	A_24_P257099	HJURP	Holliday junction recognition protein	0.000154077	0.21783	-4.59074
NM_198471	A_24_P7693	KANK3	KN motif and ankyrin repeat domains 3	1.0641e-05	6.30223	6.30223
NM_005128	A_23_P253586	DOPEY2	dopey family member 2	0.000884405	0.342313	-2.9213
THC2697511	A_32_P49854			0.000257125	0.317809	-3.14655
ENST00000517816	A_24_P634602			0.000104855	0.365361	-2.73702
NM_005645	A_23_P35148	TAF13	TAF13 RNA polymerase II, TATA box binding protein (TBP)-associated factor, 18kDa	0.000173495	2.58197	2.58197
NM_212472	A_24_P356592	PRKAR1A	protein kinase, cAMP-dependent, regulatory, type I, alpha (tissue specific extinguisher 1)	0.00411539	2.0392	2.0392
NM_012117	A_23_P2355	CBX5	chromobox homolog 5	8.5011e-06	0.476996	-2.09645
X75304	A_23_P33173	GOLGB1	golgin B1	0.00570993	5.19013	5.19013
NM_001424	A_23_P304682	EMP2	epithelial membrane protein 2	0.000926603	0.444195	-2.25126
BC020163	A_23_P157838			0.000420746	0.441527	-2.26487
THC2635591	A_32_P221631			0.00173013	2.92087	2.92087
NM_012291	A_32_P119007	ESPL1	extra spindle pole bodies homolog 1 (S. cerevisiae)	0.000313461	0.24403	-4.09785
NM_001011667	A_23_P338603	CHCHD7	coiled-coil-helix-coiled-coil-helix domain containing 7	0.000279116	2.15679	2.15679
NM_007331	A_23_P307328	WHSC1	Wolf-Hirschhorn syndrome candidate 1	0.000244893	0.230121	-4.34553
NM_012079	A_23_P112162	DGAT1	diacylglycerol O-acyltransferase 1	3.09846e-05	3.65188	3.65188
NM_001034836	A_23_P141447	RDM1	RAD52 motif 1	0.000592462	0.384194	-2.60285
NM_031419	A_23_P212089	NFKBIZ	nuclear factor of kappa light polypeptide gene enhancer in B-cells inhibitor, zeta	0.0050139	2.01977	2.01977
NM_013267	A_24_P326739	GLS2	glutaminase 2 (liver, mitochondrial)	4.87999e-05	5.46084	5.46084
NM_020770	A_24_P45728	CGN	cingulin	0.000439427	0.309637	-3.22959
NM_025040	A_23_P355993	ZNF614	zinc finger protein 614	0.00189425	2.59913	2.59913
NM_004346	A_23_P92410	CASP3	caspase 3, apoptosis-related cysteine peptidase	0.00250018	2.29717	2.29717
NM_024923	A_24_P282000	NUP210	nucleoporin 210kDa	0.00164847	0.329519	-3.03473
NM_016084	A_24_P348006	RASD1	RAS, dexamethasone-induced 1	1.68561e-05	19.1442	19.1442
NM_207481	A_24_P298224	NCKAP5	NCK-associated protein 5	0.000139492	0.41004	-2.43879
NM_002653	A_23_P58642	PITX1	paired-like homeodomain 1	0.00113732	0.455481	-2.19548
NM_016335	A_23_P68786	PRODH	proline dehydrogenase (oxidase) 1	5.97322e-05	6.45415	6.45415
NM_020652	A_23_P89327	ZNF286A	zinc finger protein 286A	0.00108732	2.98243	2.98243
NM_021137	A_23_P38446	TNFAIP1	tumor necrosis factor, alpha-induced protein 1 (endothelial)	8.34924e-06	2.11912	2.11912
NM_152551	A_24_P46725	SNRNP48	small nuclear ribonucleoprotein 48kDa (U11/U12)	0.00138884	2.57318	2.57318
NM_207308	A_23_P366098	NUP210L	nucleoporin 210kDa-like	0.000163363	0.422068	-2.36929
THC2688670	A_32_P27209			0.000422868	0.323765	-3.08866
NM_139355	A_23_P50678	MATK	megakaryocyte-associated tyrosine kinase	0.000288234	0.287026	-3.484
ENST00000606994	?	?	?	0.000137879	2.20371	2.20371
ENST00000521369	A_32_P151823			0.00010426	3.06704	3.06704
U15173	A_23_P317001	BNIP2	BCL2/adenovirus E1B 19kDa interacting protein 2	0.00263225	3.54145	3.54145
NM_016368	A_23_P5131	ISYNA1	inositol-3-phosphate synthase 1	9.31577e-05	2.34784	2.34784
NM_198949	A_23_P134295	NUDT1	nudix (nucleoside diphosphate linked moiety X)-type motif 1	0.00011278	0.48356	-2.068
BC071773	A_32_P7516			0.000563734	2.02293	2.02293
NM_001381	A_23_P5610	DOK1	docking protein 1, 62kDa (downstream of tyrosine kinase 1)	0.00168802	0.492145	-2.03192
ENST00000600228	?	?	?	0.00122539	2.89734	2.89734
A_23_P14432	?	?	?	2.84362e-05	0.255162	-3.91908
NM_203297	A_24_P277615	TRIM7	tripartite motif containing 7	0.0013059	0.239253	-4.17968
NM_003545	A_23_P415411	HIST1H4E	histone cluster 1, H4e	0.000927051	0.242904	-4.11686
NM_130897	A_23_P94840	DYNLRB2	dynein, light chain, roadblock-type 2	0.00014259	2.64618	2.64618
NM_003390	A_23_P127926	WEE1	WEE1 homolog (S. pombe)	0.000802836	0.452841	-2.20828
A_23_P170713	?	?	?	4.95536e-05	2.83818	2.83818
NM_016577	A_24_P475349	RAB6B	RAB6B, member RAS oncogene family	0.00172504	0.474463	-2.10765
NM_001253790	?	?	?	0.000854255	0.419702	-2.38264
NM_005483	A_24_P53519	CHAF1A	chromatin assembly factor 1, subunit A (p150)	0.000301582	0.343009	-2.91538
NM_014597	A_23_P97584	DNTTIP2	deoxynucleotidyltransferase, terminal, interacting protein 2	0.0109238	3.20934	3.20934
NM_020696	A_32_P54018	KIAA1143	KIAA1143	0.0034279	2.26259	2.26259
NM_144591	A_24_P201353	C10orf32	chromosome 10 open reading frame 32	0.000847632	2.98042	2.98042
ENST00000491378	A_24_P126325	C1orf63	chromosome 1 open reading frame 63	0.000869132	2.91953	2.91953
ENST00000367701	?	?	?	0.00760879	2.82022	2.82022
A_24_P477102	?	?	?	0.000937209	0.489037	-2.04483
NM_022909	A_23_P110802	CENPH	centromere protein H	7.10814e-05	0.311589	-3.20935
NM_020134	A_23_P401691	DPYSL5	dihydropyrimidinase-like 5	0.000994527	0.326648	-3.0614
ENST00000261326	A_32_P48086	MOCOS	molybdenum cofactor sulfurase	0.00197657	0.455432	-2.19572
AF307332	?	?	?	0.000796284	2.26717	2.26717
NM_003437	A_23_P67312	ZNF136	zinc finger protein 136	0.00324619	2.25803	2.25803
NM_015481	A_24_P403734	ZNF385A	zinc finger protein 385A	5.66631e-05	5.51222	5.51222
NM_021825	A_24_P133085	CCDC90B	coiled-coil domain containing 90B	0.00379553	2.28053	2.28053
NM_183357	A_24_P919249	ADCY5	adenylate cyclase 5	0.00358319	0.34722	-2.88002
NM_003383	A_23_P43476	VLDLR	very low density lipoprotein receptor	0.00021971	0.444683	-2.24879
NM_004968	A_24_P372012	ICA1	islet cell autoantigen 1, 69kDa	6.67831e-05	0.335994	-2.97625
A_32_P48615	?	?	?	0.00420943	3.24007	3.24007
NM_003104	A_32_P89691	SORD	sorbitol dehydrogenase	0.000138642	0.433255	-2.30811
NM_148903	A_23_P412476	GREB1	growth regulation by estrogen in breast cancer 1	0.0042419	0.423751	-2.35987
ENST00000585041	?	?	?	0.00110495	2.50223	2.50223
NM_000419	A_24_P65373	ITGA2B	integrin, alpha 2b (platelet glycoprotein IIb of IIb/IIIa complex, antigen CD41)	0.00053982	0.462456	-2.16237
NR_002834	A_32_P157846	DUSP5P	dual specificity phosphatase 5 pseudogene	0.00403586	0.472535	-2.11625
NM_002722	A_23_P207336	PPY	pancreatic polypeptide	0.000193876	5.09166	5.09166
NM_021983	A_24_P370472	HLA-DRB4	major histocompatibility complex, class II, DR beta 4	0.000245161	0.213146	-4.69162
NM_017699	A_23_P132515	SIDT1	SID1 transmembrane family, member 1	0.000537933	0.395762	-2.52677
NM_001008712	A_23_P71316	RBPMS	RNA binding protein with multiple splicing	0.000496967	0.290629	-3.44081
NM_006026	A_23_P96087	H1FX	H1 histone family, member X	0.000737179	0.389199	-2.56938
NM_024874	A_24_P144936	KIAA0319L	KIAA0319-like	0.000623896	0.476527	-2.09852
NM_002073	A_23_P416581	GNAZ	guanine nucleotide binding protein (G protein), alpha z polypeptide	0.00061505	0.436555	-2.29066
ENST00000422542	?	?	?	0.000124012	0.438516	-2.28042
NM_178820	A_24_P113264	FBXO27	F-box protein 27	0.000300095	0.262977	-3.80262
NM_005578	A_32_P70519	LPP	LIM domain containing preferred translocation partner in lipoma	0.000167557	0.279075	-3.58326
NM_030929	A_23_P421011	KAZALD1	Kazal-type serine peptidase inhibitor domain 1	0.00135091	0.427081	-2.34148
NM_001145205	A_32_P213091	SHISA9	shisa homolog 9 (Xenopus laevis)	0.000627211	0.469544	-2.12972
NM_004487	A_24_P240137	GOLGB1	golgin B1	0.0102743	4.5499	4.5499
NM_001006946	A_24_P97129	SDC1	syndecan 1	2.7253e-05	2.45377	2.45377
NM_001001555	A_24_P235266	GRB10	growth factor receptor-bound protein 10	0.000603237	0.2986	-3.34896
NM_002957	A_23_P423197	RXRA	retinoid X receptor, alpha	0.00247268	0.449128	-2.22653
NM_014720	A_24_P146670	SLK	STE20-like kinase	0.0126709	3.59848	3.59848
THC2653012	A_32_P125820			1.65635e-05	2.10293	2.10293
NM_207333	A_32_P540407	ZNF320	zinc finger protein 320	0.00252657	3.61483	3.61483
NR_036623	A_23_P152753	DBF4B	DBF4 homolog B (S. cerevisiae)	0.00119847	0.276988	-3.61027
NM_006267	A_24_P350890	RANBP2	RAN binding protein 2	0.00750936	5.57085	5.57085
NM_013363	A_23_P57709	PCOLCE2	procollagen C-endopeptidase enhancer 2	0.000203971	0.338764	-2.95191
NM_173582	A_32_P122703	PGM2L1	phosphoglucomutase 2-like 1	0.00193063	4.70293	4.70293
NM_001161331	A_24_P332647	SSH1	slingshot homolog 1 (Drosophila)	0.000599569	0.439158	-2.27708
ENST00000452565	A_32_P174214			3.63471e-05	3.0103	3.0103
NM_001040185	A_32_P84772	ZNF765	zinc finger protein 765	0.00321006	3.86206	3.86206
NM_001048265	A_23_P422115	C9orf116	chromosome 9 open reading frame 116	0.000475469	0.431232	-2.31894
NM_001008739	A_32_P149174	C6orf226	chromosome 6 open reading frame 226	0.000169823	2.73343	2.73343
NM_030916	A_23_P46441	PVRL4	poliovirus receptor-related 4	2.55257e-05	3.91669	3.91669
NM_152744	A_24_P16417	SDK1	sidekick homolog 1, cell adhesion molecule (chicken)	0.000319731	0.237927	-4.20296
NM_004431	A_23_P149281	EPHA2	EPH receptor A2	2.38806e-05	8.17138	8.17138
NM_003598	A_23_P119344	TEAD2	TEA domain family member 2	0.000386717	0.408639	-2.44715
NM_003273	A_23_P127426	TM7SF2	transmembrane 7 superfamily member 2	7.58442e-05	2.12206	2.12206
NM_005985	A_23_P131846	SNAI1	snail homolog 1 (Drosophila)	0.00925618	2.88907	2.88907
NM_004113	A_24_P334300	FGF12	fibroblast growth factor 12	0.000176239	0.255103	-3.91999
BM955917	?	?	?	0.0019373	0.469498	-2.12994
NM_030622	A_23_P101374	CYP2S1	cytochrome P450, family 2, subfamily S, polypeptide 1	7.77447e-05	9.90033	9.90033
NM_033196	A_24_P944588	ZNF682	zinc finger protein 682	0.0010405	2.42366	2.42366
NM_207380	A_23_P163475	C15orf52	chromosome 15 open reading frame 52	0.00146164	0.25948	-3.85386
NM_015340	A_23_P212397	LARS2	leucyl-tRNA synthetase 2, mitochondrial	0.000451799	0.426935	-2.34228
NM_145207	A_23_P404129	SPATA5	spermatogenesis associated 5	7.07077e-05	0.379706	-2.63362
NM_001167608	A_23_P147514	RHBDD1	rhomboid domain containing 1	0.000895938	0.45581	-2.1939
NM_013434	A_23_P356004	KCNIP3	Kv channel interacting protein 3, calsenilin	0.00113598	0.386502	-2.58731
NM_001018072	A_23_P419714	BTBD11	BTB (POZ) domain containing 11	0.000381706	0.324481	-3.08184
NM_003282	A_23_P24784	TNNI2	troponin I type 2 (skeletal, fast)	0.00350681	2.87452	2.87452
A_32_P51688	?	?	?	0.00218429	2.27702	2.27702
NM_014909	A_24_P304629	VASH1	vasohibin 1	0.00176239	0.461917	-2.16489
NM_153253	A_23_P127460	SIPA1	signal-induced proliferation-associated 1	0.00250694	0.492272	-2.0314
NM_005804	A_23_P78664	DDX39A	DEAD (Asp-Glu-Ala-Asp) box polypeptide 39A	0.00043916	0.443119	-2.25673
NM_002307	A_24_P238250	LGALS7	lectin, galactoside-binding, soluble, 7	0.000245074	10.2268	10.2268
NM_024649	A_24_P184305	BBS1	Bardet-Biedl syndrome 1	6.02894e-05	4.3674	4.3674
NM_018013	A_23_P156907	SOBP	sine oculis binding protein homolog (Drosophila)	0.000839908	0.323569	-3.09054
THC2685559	A_32_P42253			0.000304876	3.97471	3.97471
NM_024116	A_24_P261383	TAF1D	TATA box binding protein (TBP)-associated factor, RNA polymerase I, D, 41kDa	0.00423138	2.67981	2.67981
NM_017688	A_24_P180849	BSPRY	B-box and SPRY domain containing	0.00028733	0.438299	-2.28155
NM_000311	A_23_P109143	PRNP	prion protein	0.00160443	2.27206	2.27206
HY215385	?	?	?	0.000977712	0.211284	-4.73296
NM_005971	A_24_P293192	FXYD3	FXYD domain containing ion transport regulator 3	7.918e-05	2.94405	2.94405
NM_024558	A_23_P128940	METTL21D	methyltransferase like 21D	0.00186215	2.27634	2.27634
NM_144963	A_24_P845072	FAM91A1	family with sequence similarity 91, member A1	0.003889	2.32468	2.32468
NM_144988	A_23_P257423	ALG14	asparagine-linked glycosylation 14 homolog (S. cerevisiae)	0.000276092	0.357343	-2.79843
THC2614876	A_32_P81092			0.00980777	2.55253	2.55253
NM_001547	A_24_P304071	IFIT2	interferon-induced protein with tetratricopeptide repeats 2	0.00022469	7.01093	7.01093
NM_001278432	?	?	?	0.0115399	2.6738	2.6738
NM_024409	A_23_P301942	NPPC	natriuretic peptide C	0.000250164	4.44159	4.44159
NM_031370	A_24_P123245	HNRNPD	heterogeneous nuclear ribonucleoprotein D (AU-rich element RNA binding protein 1, 37kDa)	0.000208053	0.427284	-2.34036
ENST00000381655	A_24_P944714	ATP8A2	ATPase, aminophospholipid transporter, class I, type 8A, member 2	0.000190205	0.285016	-3.50858
NM_018397	A_32_P73507	CHDH	choline dehydrogenase	0.00150749	0.490506	-2.03871
NM_020808	A_23_P137470	SIPA1L2	signal-induced proliferation-associated 1 like 2	0.000513895	0.426351	-2.34549
NM_017912	A_23_P250358	HERC6	hect domain and RLD 6	4.16732e-05	0.358775	-2.78726
NM_170743	A_23_P74112	IL28RA	interleukin 28 receptor, alpha (interferon, lambda receptor)	0.0101419	0.43735	-2.2865
NM_001292030	?	?	?	0.000105189	0.454888	-2.19834
ENST00000607057	?	?	?	0.00231699	0.418376	-2.39019
NM_017714	A_23_P120557	TASP1	taspase, threonine aspartase, 1	6.04986e-05	0.316181	-3.16274
NM_032177	A_24_P573484	PHAX	phosphorylated adaptor for RNA export	0.00482944	2.00551	2.00551
NM_174912	A_23_P113471	FAAH2	fatty acid amide hydrolase 2	0.000172077	0.246644	-4.05443
NM_174911	A_32_P437227	FAM84B	family with sequence similarity 84, member B	0.000102384	2.73317	2.73317
NM_032549	A_32_P87872	IMMP2L	IMP2 inner mitochondrial membrane peptidase-like (S. cerevisiae)	0.000154637	0.293754	-3.40421
NM_015035	A_24_P57700	ZHX3	zinc fingers and homeoboxes 3	0.000444735	0.426031	-2.34725
NM_014433	A_23_P29153	RTDR1	rhabdoid tumor deletion region gene 1	0.00662396	0.467095	-2.14089
ENST00000598297	?	?	?	0.00100116	0.483079	-2.07006
NM_004004	A_23_P204947	GJB2	gap junction protein, beta 2, 26kDa	0.000643614	0.30539	-3.2745
NM_006634	A_23_P39840	VAMP5	vesicle-associated membrane protein 5 (myobrevin)	6.18052e-05	6.13618	6.13618
ENST00000519902	A_32_P18838			0.00613338	2.18207	2.18207
NM_032900	A_23_P334845	ARHGAP19	Rho GTPase activating protein 19	0.000252825	0.358013	-2.7932
NM_198253	A_23_P110851	TERT	telomerase reverse transcriptase	0.00704287	0.467361	-2.13967
NM_001277120	?	?	?	0.00550829	3.15946	3.15946
NM_006675	A_24_P218905	TSPAN9	tetraspanin 9	0.00312233	0.445634	-2.244
NM_002735	A_32_P72394	PRKAR1B	protein kinase, cAMP-dependent, regulatory, type I, beta	0.000908037	0.435601	-2.29568
NM_000231	A_23_P423237	SGCG	sarcoglycan, gamma (35kDa dystrophin-associated glycoprotein)	0.000152337	0.0775235	-12.8993
NM_006695	A_24_P91094	RUNDC3A	RUN domain containing 3A	0.000146388	2.97924	2.97924
NM_004993	A_24_P13595	ATXN3	ataxin 3	0.00898247	2.36915	2.36915
AK127081	A_32_P156024			0.00188574	2.04172	2.04172
NM_080737	A_24_P122337	SYTL4	synaptotagmin-like 4	0.000125179	0.313827	-3.18647
NR_002728	A_32_P41924	KCNQ1OT1	KCNQ1 opposite strand/antisense transcript 1 (non-protein coding)	0.00368813	3.30778	3.30778
A_24_P912985	?	?	?	4.68881e-05	5.88483	5.88483
NM_173468	A_23_P347059	MOB1B	MOB kinase activator 1B	0.0093801	3.84108	3.84108
NM_022003	A_23_P150394	FXYD6	FXYD domain containing ion transport regulator 6	0.000331749	0.436196	-2.29254
THC2618720	A_32_P109495			0.0103695	3.02127	3.02127
NM_002542	A_23_P344392	OGG1	8-oxoguanine DNA glycosylase	0.000718624	0.469193	-2.13132
NM_001004023	A_24_P345209	DYRK3	dual-specificity tyrosine-(Y)-phosphorylation regulated kinase 3	1.16791e-05	2.72013	2.72013
NM_206967	A_24_P289178	C16orf74	chromosome 16 open reading frame 74	0.00115194	0.474467	-2.10763
A_32_P228570	?	?	?	0.00156333	0.428153	-2.33561
NR_026860	A_32_P8546	LINC00473	long intergenic non-protein coding RNA 473	0.000140425	4.68566	4.68566
AK027091	A_23_P399292			0.000873442	2.09798	2.09798
ENST00000588960	?	?	?	0.00284987	0.279271	-3.58075
NM_004843	A_24_P348326	IL27RA	interleukin 27 receptor, alpha	0.000847225	0.430094	-2.32507
NM_001135178	A_23_P208143	ZNF397	zinc finger protein 397	0.000427099	2.25464	2.25464
NM_025264	A_23_P131348	THUMPD2	THUMP domain containing 2	0.0026411	2.74449	2.74449
NM_004086	A_24_P184803	COCH	coagulation factor C homolog, cochlin (Limulus polyphemus)	5.59872e-05	0.380355	-2.62913
THC2690347	A_32_P62288			0.00292748	2.76767	2.76767
NM_024680	A_23_P35871	E2F8	E2F transcription factor 8	0.00155205	0.280661	-3.56302
NM_144609	A_24_P39724	CCDC43	coiled-coil domain containing 43	0.00718028	2.21331	2.21331
NM_024979	A_24_P390172	MCF2L	MCF.2 cell line derived transforming sequence-like	0.00286121	0.492632	-2.02991
NM_001002259	A_24_P56281	CAPRIN2	caprin family member 2	0.00202175	2.05296	2.05296
A_32_P160670	?	?	?	0.0018269	4.77435	4.77435
NM_003611	A_24_P134653	OFD1	oral-facial-digital syndrome 1	0.00601001	2.30476	2.30476
NR_034075	A_24_P943802	LOC100499177	uncharacterized LOC100499177	0.00446728	2.28735	2.28735
NM_006910	A_23_P363206	RBBP6	retinoblastoma binding protein 6	0.00819326	3.72351	3.72351
NM_001969	A_24_P415959	EIF5	eukaryotic translation initiation factor 5	0.00376063	2.27695	2.27695
NM_181471	A_23_P93823	RFC2	replication factor C (activator 1) 2, 40kDa	0.000101072	0.375842	-2.66069
CU678563	A_32_P118578			0.00179113	0.445329	-2.24553
NM_020368	A_23_P92424	UTP3	UTP3, small subunit (SSU) processome component, homolog (S. cerevisiae)	0.00129859	2.64916	2.64916
NM_152392	A_23_P372467	AHSA2	AHA1, activator of heat shock 90kDa protein ATPase homolog 2 (yeast)	0.000455641	2.37715	2.37715
NM_012133	A_23_P61280	COPG2	coatomer protein complex, subunit gamma 2	0.000537282	0.394125	-2.53726
NM_004060	A_23_P58606	CCNG1	cyclin G1	0.00671235	2.67505	2.67505
NM_207362	A_24_P272313	C2orf55	chromosome 2 open reading frame 55	0.000864102	0.365648	-2.73487
NM_004742	A_24_P75220	MAGI1	membrane associated guanylate kinase, WW and PDZ domain containing 1	0.0038063	0.346216	-2.88837
NR_045002	A_23_P350754	OR7E14P	olfactory receptor, family 7, subfamily E, member 14 pseudogene	0.0014977	0.372242	-2.68642
NM_003913	A_24_P941787	PRPF4B	PRP4 pre-mRNA processing factor 4 homolog B (yeast)	0.00228024	2.98241	2.98241
NM_021030	A_23_P101811	ZNF14	zinc finger protein 14	0.00324231	3.21344	3.21344
NM_022748	A_24_P346431	TNS3	tensin 3	0.00165075	0.284481	-3.51518
NM_001761	A_24_P193592	CCNF	cyclin F	0.00165715	0.289925	-3.44917
NM_052875	A_24_P107336	VPS26B	vacuolar protein sorting 26 homolog B (S. pombe)	0.000594341	0.427736	-2.33789
NM_001399	A_23_P34045	EDA	ectodysplasin A	0.00192755	0.269086	-3.71628
NM_025049	A_23_P416468	PIF1	PIF1 5'-to-3' DNA helicase homolog (S. cerevisiae)	0.000437161	0.211852	-4.72027
ENST00000477624	A_24_P414256	CCDC72	coiled-coil domain containing 72	0.000479896	2.06814	2.06814
NM_020245	A_23_P382045	TULP4	tubby like protein 4	0.000337735	0.363327	-2.75234
NM_014905	A_23_P39766	GLS	glutaminase	0.00219606	2.81394	2.81394
NM_006142	A_23_P63254	SFN	stratifin	0.000204041	3.57283	3.57283
NM_003706	A_24_P316439	PLA2G4C	phospholipase A2, group IVC (cytosolic, calcium-independent)	4.91722e-05	5.44767	5.44767
NM_001007467	A_24_P242021	SFI1	Sfi1 homolog, spindle assembly associated (yeast)	0.00105668	0.438958	-2.27812
A_24_P418028	?	?	?	0.0105316	2.04967	2.04967
ENST00000341446	A_24_P275386	BRI3BP	BRI3 binding protein	0.00143628	0.407371	-2.45476
NM_052847	A_32_P136295	GNG7	guanine nucleotide binding protein (G protein), gamma 7	0.00171764	0.396687	-2.52088
NM_006877	A_24_P277657	GMPR	guanosine monophosphate reductase	0.000486534	0.395448	-2.52878
NM_005375	A_23_P31073	MYB	v-myb myeloblastosis viral oncogene homolog (avian)	0.000399835	0.328537	-3.0438
NM_001005743	A_23_P88381	NUMB	numb homolog (Drosophila)	0.000355271	0.48432	-2.06475
NM_005802	A_23_P32217	TOPORS	topoisomerase I binding, arginine/serine-rich, E3 ubiquitin protein ligase	0.00927948	2.41131	2.41131
NM_019600	A_24_P357576	KIAA1370	KIAA1370	0.00486721	3.03534	3.03534
NM_015982	A_23_P49865	YBX2	Y box binding protein 2	0.00047741	0.26764	-3.73637
BX101252	A_32_P56463			0.000125893	6.26766	6.26766
NM_001291315	?	?	?	0.000445271	0.328285	-3.04614
NM_181453	A_32_P129660	GCC2	GRIP and coiled-coil domain containing 2	0.00458835	3.8986	3.8986
BC065040	A_24_P2584	C1orf63	chromosome 1 open reading frame 63	0.0032894	2.855	2.855
NM_153608	A_23_P368779	ZNF114	zinc finger protein 114	7.66608e-05	2.45756	2.45756
A_32_P75141	?	?	?	8.44668e-05	5.97654	5.97654
NM_001004127	A_24_P102389	ALG11	asparagine-linked glycosylation 11, alpha-1,2-mannosyltransferase homolog (yeast)	0.000724189	2.15945	2.15945
ENST00000542925	A_23_P25069			0.000194788	0.438913	-2.27836
NM_138374	A_32_P207436	ZNF845	zinc finger protein 845	0.00979233	3.22379	3.22379
NM_031446	A_23_P101237	C18orf21	chromosome 18 open reading frame 21	0.00223665	2.33583	2.33583
NM_032872	A_32_P217773	SYTL1	synaptotagmin-like 1	0.00014414	3.93883	3.93883
NM_145197	A_23_P501805	LIPT1	lipoyltransferase 1	0.00326238	2.0614	2.0614
NM_000364	A_24_P257022	TNNT2	troponin T type 2 (cardiac)	0.00648584	2.63718	2.63718
NM_030799	A_24_P328969	YIPF5	Yip1 domain family, member 5	0.00458864	2.27654	2.27654
NM_001015892	A_32_P90210	TAF9	TAF9 RNA polymerase II, TATA box binding protein (TBP)-associated factor, 32kDa	0.00782486	2.32076	2.32076
NM_138420	A_24_P273253	AHNAK2	AHNAK nucleoprotein 2	3.83034e-05	6.34795	6.34795
NM_005977	A_24_P144881	RNF6	ring finger protein (C3H2C3 type) 6	0.00809789	3.68986	3.68986
NM_015412	A_24_P921155	C3orf17	chromosome 3 open reading frame 17	0.00479423	2.23296	2.23296
NM_016426	A_23_P57588	GTSE1	G-2 and S-phase expressed 1	0.000390168	0.172454	-5.79865
NM_014751	A_23_P347632	MTSS1	metastasis suppressor 1	0.000983018	0.215326	-4.64411
NM_005165	A_23_P78108	ALDOC	aldolase C, fructose-bisphosphate	0.000175386	3.11762	3.11762
NM_001649	A_23_P217755	SHROOM2	shroom family member 2	0.00478002	0.363376	-2.75197
NM_005914	A_23_P370989	MCM4	minichromosome maintenance complex component 4	0.000274917	0.455099	-2.19732
NM_032587	A_23_P41854	CARD6	caspase recruitment domain family, member 6	2.02019e-05	2.82826	2.82826
NM_023110	A_23_P301304	FGFR1	fibroblast growth factor receptor 1	0.000812338	0.454088	-2.20222
NM_020755	A_24_P129232	SERINC1	serine incorporator 1	0.00891098	2.74092	2.74092
A_32_P18300	?	?	?	0.00308599	3.58572	3.58572
NM_004957	A_23_P9465	FPGS	folylpolyglutamate synthase	0.00103631	0.450663	-2.21895
NM_017996	A_23_P26184	DET1	de-etiolated homolog 1 (Arabidopsis)	0.00173	0.410076	-2.43857
NM_004165	A_24_P262127	RRAD	Ras-related associated with diabetes	2.87008e-05	3.18351	3.18351
NM_174941	A_23_P61466	CD163L1	CD163 molecule-like 1	6.27573e-06	2.02312	2.02312
NM_017948	A_24_P58453	NOL8	nucleolar protein 8	0.0107531	3.29554	3.29554
NM_144674	A_32_P130309	TEKT5	tektin 5	0.000845226	0.454151	-2.20191
THC2689950	?	?	?	0.000252923	2.77038	2.77038
NM_024701	A_24_P278299	ASB13	ankyrin repeat and SOCS box containing 13	0.000760309	0.327362	-3.05472
NM_000599	A_23_P383009	IGFBP5	insulin-like growth factor binding protein 5	0.00116415	0.296337	-3.37454
NM_152531	A_23_P345710	XXYLT1	xyloside xylosyltransferase 1	0.00107379	0.43795	-2.28337
NM_170721	A_23_P369479	MSI2	musashi homolog 2 (Drosophila)	0.000413178	0.277063	-3.60929
NM_006991	A_24_P385148	ZNF197	zinc finger protein 197	0.000279119	2.13794	2.13794
NM_013314	A_24_P64344	BLNK	B-cell linker	0.000279085	3.49706	3.49706
NM_001255	A_23_P149200	CDC20	cell division cycle 20 homolog (S. cerevisiae)	0.000305582	0.185624	-5.38724
NM_018672	A_24_P67096	ABCA5	ATP-binding cassette, sub-family A (ABC1), member 5	0.00474044	3.19607	3.19607
NM_152421	A_23_P431305	FAM69B	family with sequence similarity 69, member B	0.00144225	0.482175	-2.07393
NM_198181	A_32_P60343	GOLGA6L9	golgin A6 family-like 9	0.0026501	2.04056	2.04056
NM_005505	A_24_P324565	SCARB1	scavenger receptor class B, member 1	0.00203891	0.499192	-2.00324
NM_194324	A_23_P96599	TMSB15B	thymosin beta 15B	0.000185316	0.415772	-2.40517
NM_001171080	A_32_P67747	RBM41	RNA binding motif protein 41	0.00932256	5.00333	5.00333
NM_002448	A_24_P345837	MSX1	msh homeobox 1	0.000266915	3.00502	3.00502
NM_015185	A_24_P254551	ARHGEF9	Cdc42 guanine nucleotide exchange factor (GEF) 9	0.000124404	0.448497	-2.22967
NM_014862	A_23_P83579	ARNT2	aryl-hydrocarbon receptor nuclear translocator 2	5.16864e-05	2.02262	2.02262
NM_001290117	?	?	?	0.00513144	0.453521	-2.20497
NM_014904	A_24_P363953	RAB11FIP2	RAB11 family interacting protein 2 (class I)	0.00400344	3.15861	3.15861
XR_426266	?	?	?	0.000901356	0.328925	-3.04021
NM_001002029	A_23_P42282	C4B	complement component 4B (Chido blood group)	4.29656e-05	7.01871	7.01871
NM_032855	A_23_P153372	HSH2D	hematopoietic SH2 domain containing	0.00283334	0.475713	-2.10211
NM_001457	A_23_P211878	FLNB	filamin B, beta	0.00264316	0.400429	-2.49732
A_32_P118522	?	?	?	0.00264443	2.04759	2.04759
A_32_P190097	?	?	?	0.00258458	2.19454	2.19454
NM_013982	A_32_P163894	NRG2	neuregulin 2	0.00294083	2.022	2.022
NM_007269	A_23_P51996	STXBP3	syntaxin binding protein 3	0.00809653	3.05597	3.05597
NM_015155	A_23_P405942	LARP4B	La ribonucleoprotein domain family, member 4B	0.000222893	0.418409	-2.39
NR_037566	A_32_P25176	BCRP2	breakpoint cluster region pseudogene 2	0.00284467	0.492226	-2.03159
NM_018247	A_24_P180424	TMEM30A	transmembrane protein 30A	0.00450749	2.61149	2.61149
NM_032927	A_23_P29924	TMEM128	transmembrane protein 128	0.00110524	2.17873	2.17873
NM_022443	A_23_P419947	MLF1	myeloid leukemia factor 1	0.00681942	2.27657	2.27657
NM_012337	A_23_P62642	CCDC19	coiled-coil domain containing 19	0.000583904	0.295862	-3.37995
NM_006449	A_23_P209636	CDC42EP3	CDC42 effector protein (Rho GTPase binding) 3	0.000285878	3.97941	3.97941
NM_001042601	A_24_P910854	TTC14	tetratricopeptide repeat domain 14	0.0112936	2.59596	2.59596
A_24_P835388	?	?	?	6.79092e-05	2.16952	2.16952
NM_001628	A_23_P258190	AKR1B1	aldo-keto reductase family 1, member B1 (aldose reductase)	0.000205421	4.84845	4.84845
NM_004199	A_23_P30363	P4HA2	prolyl 4-hydroxylase, alpha polypeptide II	2.9358e-05	2.46804	2.46804
NM_001014980	A_32_P75792	FAM132A	family with sequence similarity 132, member A	5.20511e-05	4.55542	4.55542
NM_004341	A_23_P40049	CAD	carbamoyl-phosphate synthetase 2, aspartate transcarbamylase, and dihydroorotase	0.00640082	0.495526	-2.01806
XM_006726456	?	?	?	0.0016421	2.64573	2.64573
AF090919	A_23_P333998	POLQ	polymerase (DNA directed), theta	0.00133273	0.417383	-2.39588
NM_005603	A_23_P107597	ATP8B1	ATPase, aminophospholipid transporter, class I, type 8B, member 1	2.90193e-05	0.30171	-3.31444
NM_015361	A_23_P380998	R3HDM1	R3H domain containing 1	0.00017037	0.354259	-2.82279
NM_153836	A_23_P394986	CREG2	cellular repressor of E1A-stimulated genes 2	0.00056666	4.53436	4.53436
NM_021159	A_23_P58207	RAP1GDS1	RAP1, GTP-GDP dissociation stimulator 1	1.57673e-05	0.333495	-2.99855
NM_002970	A_23_P378722	SAT1	spermidine/spermine N1-acetyltransferase 1	0.00110424	2.92919	2.92919
NM_021147	A_24_P246397	CCNO	cyclin O	0.00297975	0.424406	-2.35623
NM_001093	A_23_P87791	ACACB	acetyl-CoA carboxylase beta	0.00191807	0.267903	-3.73269
NM_016545	A_24_P379223	IER5	immediate early response 5	0.000291888	3.08792	3.08792
NM_004059	A_23_P315206	CCBL1	cysteine conjugate-beta lyase, cytoplasmic	0.000739228	0.340964	-2.93286
NM_016500	A_23_P217785	CXorf26	chromosome X open reading frame 26	0.00304732	2.16342	2.16342
NM_018689	A_32_P161855	KIAA1199	KIAA1199	1.29725e-05	5.49588	5.49588
A_32_P45588	?	?	?	4.06698e-05	2.57814	2.57814
NM_005596	A_24_P804992	NFIB	nuclear factor I/B	5.20561e-05	0.186378	-5.36545
NM_032328	A_23_P149476	EFCAB2	EF-hand calcium binding domain 2	2.71286e-05	0.474753	-2.10636
NM_001039886	A_24_P272608	ZNF808	zinc finger protein 808	0.0075933	3.14345	3.14345
NM_002641	A_24_P288754	PIGA	phosphatidylinositol glycan anchor biosynthesis, class A	0.0100998	2.44472	2.44472
NM_032501	A_24_P185689	ACSS1	acyl-CoA synthetase short-chain family member 1	0.000863064	0.27384	-3.65177
NM_004235	A_23_P32233	KLF4	Kruppel-like factor 4 (gut)	0.00101397	2.74084	2.74084
NM_014935	A_23_P431268	PLEKHA6	pleckstrin homology domain containing, family A member 6	0.00259819	0.424481	-2.35582
NM_001025100	A_24_P402080	MBP	myelin basic protein	0.00177946	0.439098	-2.2774
NM_015112	A_23_P126008	MAST2	microtubule associated serine/threonine kinase 2	0.00111098	0.217015	-4.60798
NR_038924	A_32_P41574	LOC100506649	uncharacterized LOC100506649	0.000430917	0.339546	-2.94511
A_24_P630916	?	?	?	0.0112724	3.39683	3.39683
NM_001007271	A_23_P104471	DUSP13	dual specificity phosphatase 13	9.3017e-05	22.1668	22.1668
NM_018891	A_23_P160968	LAMC2	laminin, gamma 2	0.000113552	3.59648	3.59648
NM_001011724	A_32_P8015	HNRNPA1L2	heterogeneous nuclear ribonucleoprotein A1-like 2	2.05175e-05	0.475461	-2.10322
NM_005054	A_32_P89371	RGPD5	RANBP2-like and GRIP domain containing 5	0.00581544	4.18765	4.18765
NM_178354	A_23_P411321	LCE1F	late cornified envelope 1F	0.000294961	3.52197	3.52197
NM_198279	A_24_P841677	CXorf23	chromosome X open reading frame 23	0.00345958	2.92948	2.92948
NM_020299	A_24_P129341	AKR1B10	aldo-keto reductase family 1, member B10 (aldose reductase)	0.000211277	4.8099	4.8099
NM_019020	?	?	?	0.0013756	0.409236	-2.44357
NM_005385	A_24_P926760	NKTR	natural killer-tumor recognition sequence	0.00758411	3.28176	3.28176
NM_001039140	A_23_P28878	C20orf27	chromosome 20 open reading frame 27	0.00161969	0.420832	-2.37624
NM_015358	A_23_P325501	MORC3	MORC family CW-type zinc finger 3	0.003721	3.69012	3.69012
NM_003106	A_24_P379969	SOX2	SRY (sex determining region Y)-box 2	0.000456449	0.11293	-8.85505
NM_025080	A_23_P203392	ASRGL1	asparaginase like 1	0.000936313	0.488122	-2.04867
NM_145301	A_24_P87490	FAM18B2	family with sequence similarity 18, member B2	0.00582135	2.29112	2.29112
NM_001008401	A_24_P941487	ZNF761	zinc finger protein 761	0.0118603	3.23793	3.23793
NM_006743	A_23_P148308	RBM3	RNA binding motif (RNP1, RRM) protein 3	0.000106869	0.328051	-3.0483
NM_006622	A_23_P30254	PLK2	polo-like kinase 2	0.000153363	2.22309	2.22309
NM_030971	A_23_P202138	SFXN3	sideroflexin 3	0.00218373	0.373129	-2.68004
NM_145263	A_32_P216841	SPATA18	spermatogenesis associated 18 homolog (rat)	0.000261883	4.07363	4.07363
NM_006623	A_23_P85783	PHGDH	phosphoglycerate dehydrogenase	0.000522189	0.204315	-4.89439
BC032648	A_24_P928639	SOLH	small optic lobes homolog (Drosophila)	0.00229501	0.391891	-2.55173
NR_024126	A_23_P149695	ATP1A1OS	ATP1A1 opposite strand	0.00597907	0.45731	-2.1867
NM_000037	A_24_P162485	ANK1	ankyrin 1, erythrocytic	4.09052e-05	3.37731	3.37731
NM_002547	A_32_P132827	OPHN1	oligophrenin 1	0.00101586	0.375009	-2.6666
NM_007243	A_23_P8055	NRM	nurim (nuclear envelope membrane protein)	0.000694286	0.366286	-2.73011
NM_017890	A_24_P98251	VPS13B	vacuolar protein sorting 13 homolog B (yeast)	7.3408e-05	0.0995078	-10.0495
NM_002138	A_24_P226037	HNRNPD	heterogeneous nuclear ribonucleoprotein D (AU-rich element RNA binding protein 1, 37kDa)	0.000100515	0.407866	-2.45179
AB075864	?	?	?	0.00187409	0.490539	-2.03857
NM_198459	A_24_P6467	DENND2C	DENN/MADD domain containing 2C	0.000379481	2.89936	2.89936
NM_133510	A_23_P48481	RAD51B	RAD51 homolog B (S. cerevisiae)	0.000242388	0.163295	-6.12388
NM_002398	A_24_P319736	MEIS1	Meis homeobox 1	0.000291053	0.33057	-3.02508
NR_038269	A_24_P618928	LOC100506844	uncharacterized LOC100506844	0.000587062	0.286021	-3.49625
NM_002278	A_23_P89601	KRT32	keratin 32	0.000202451	4.85228	4.85228
NM_032230	A_24_P359020	C12orf26	chromosome 12 open reading frame 26	0.000179237	0.369706	-2.70485
NM_015187	A_23_P426021	SEL1L3	sel-1 suppressor of lin-12-like 3 (C. elegans)	0.000966987	0.448631	-2.22901
NM_004558	A_23_P90359	NRTN	neurturin	0.00670374	0.415063	-2.40927
NM_172390	A_24_P258846	NFATC1	nuclear factor of activated T-cells, cytoplasmic, calcineurin-dependent 1	0.012274	0.466168	-2.14515
NM_015094	A_23_P383132	HIC2	hypermethylated in cancer 2	1.05467e-05	4.3603	4.3603
NM_001542	A_24_P182461	IGSF3	immunoglobulin superfamily, member 3	0.00110031	0.359906	-2.7785
NM_001258311	?	?	?	0.0100777	0.486056	-2.05738
NM_002973	A_23_P389907	ATXN2	ataxin 2	0.0105672	0.482538	-2.07238
NM_003688	A_32_P168464	CASK	calcium/calmodulin-dependent serine protein kinase (MAGUK family)	0.000117746	0.252731	-3.95677
NM_003921	A_24_P19983	BCL10	B-cell CLL/lymphoma 10	3.48334e-05	2.02721	2.02721
NM_001136116	A_24_P791669	ZNF879	zinc finger protein 879	0.00431855	2.64847	2.64847
NM_014762	A_23_P379475	DHCR24	24-dehydrocholesterol reductase	0.00036755	0.331155	-3.01973
NM_001024924	A_23_P113972	EXOC1	exocyst complex component 1	0.00893636	2.31936	2.31936
NM_001001660	A_24_P648176	LYRM5	LYR motif containing 5	0.00286469	2.24658	2.24658
A_32_P213103	?	?	?	0.00903902	3.60378	3.60378
NR_034021	A_23_P121869	SMA5	glucuronidase, beta pseudogene	0.000283603	0.480555	-2.08093
NM_198850	A_32_P184488	PHLDB3	pleckstrin homology-like domain, family B, member 3	6.78759e-05	2.92256	2.92256
NM_014172	A_24_P184031	PHPT1	phosphohistidine phosphatase 1	0.000179097	2.09706	2.09706
THC2610890	A_32_P224449			0.00522869	3.67547	3.67547
NM_014335	A_24_P30806	EID1	EP300 interacting inhibitor of differentiation 1	0.00733013	2.45383	2.45383
NM_004664	A_23_P99253	LIN7A	lin-7 homolog A (C. elegans)	0.000177891	0.193765	-5.16089
NM_016353	A_24_P286687	ZDHHC2	zinc finger, DHHC-type containing 2	0.000178073	0.285321	-3.50482
NM_000367	A_24_P67375	TPMT	thiopurine S-methyltransferase	0.0103441	2.17019	2.17019
NM_000282	A_23_P48358	PCCA	propionyl CoA carboxylase, alpha polypeptide	7.03821e-05	0.198364	-5.04123
DQ786266	A_32_P162605			0.00174215	3.7435	3.7435
NM_015135	A_32_P51084	NUP205	nucleoporin 205kDa	0.000131321	0.461126	-2.1686
NM_001014279	A_23_P431591	C5orf39	chromosome 5 open reading frame 39	0.00200958	0.473058	-2.1139
NM_005907	A_23_P156431	MAN1A1	mannosidase, alpha, class 1A, member 1	0.000258557	0.434479	-2.3016
NM_021133	A_23_P390172	RNASEL	ribonuclease L (2',5'-oligoisoadenylate synthetase-dependent)	0.00584422	2.29288	2.29288
BC040303	A_32_P120791	LOC727916	uncharacterized LOC727916	3.16199e-05	5.42533	5.42533
NM_152749	A_23_P356109	ATXN7L1	ataxin 7-like 1	0.00329278	0.491271	-2.03554
NM_033380	A_24_P195785	COL4A5	collagen, type IV, alpha 5	0.000395432	0.221705	-4.51051
NM_152604	A_23_P319013	ZNF383	zinc finger protein 383	0.00113491	3.13861	3.13861
ENST00000607027	?	?	?	4.71168e-05	4.50069	4.50069
ENST00000431662	A_32_P6107			0.00697562	2.6161	2.6161
NM_144665	A_23_P361448	SESN3	sestrin 3	0.00969513	2.91562	2.91562
BG283790	?	?	?	0.000687261	0.327652	-3.05202
NM_173601	A_32_P62342	GXYLT1	glucoside xylosyltransferase 1	0.0033849	3.71926	3.71926
NM_139322	A_23_P79931	ATRN	attractin	0.000486787	0.426247	-2.34606
NM_020801	A_24_P414553	ARRDC3	arrestin domain containing 3	0.00318691	2.50268	2.50268
NM_018036	A_24_P332941	ATG2B	ATG2 autophagy related 2 homolog B (S. cerevisiae)	0.00851469	2.48281	2.48281
NM_021632	A_23_P78458	ZNF350	zinc finger protein 350	0.00191733	3.30207	3.30207
A_24_P358215	?	?	?	6.90173e-05	0.467141	-2.14068
ENST00000337530	A_32_P35232	KIAA1958	KIAA1958	0.000365366	0.415824	-2.40487
NM_006176	A_23_P116264	NRGN	neurogranin (protein kinase C substrate, RC3)	0.00152994	0.279416	-3.57889
NM_006461	A_23_P89509	SPAG5	sperm associated antigen 5	0.00018434	0.304814	-3.28069
NM_016061	A_23_P108835	YPEL5	yippee-like 5 (Drosophila)	0.00962459	2.25285	2.25285
NM_003844	A_23_P255653	TNFRSF10A	tumor necrosis factor receptor superfamily, member 10a	0.000171234	2.29472	2.29472
NM_002587	A_23_P213359	PCDH1	protocadherin 1	0.00127526	0.258993	-3.86111
AL136554	?	?	?	0.000750886	0.30444	-3.28472
AB043587	A_23_P200477	ACBD3	acyl-CoA binding domain containing 3	0.00698004	2.459	2.459
NM_030809	A_23_P151209	CSRNP2	cysteine-serine-rich nuclear protein 2	2.7705e-05	2.49474	2.49474
THC2547913	A_24_P33595			0.000961426	0.373928	-2.67431
NM_013233	A_24_P19544	STK39	serine threonine kinase 39	0.000143799	0.292727	-3.41615
NM_001001419	A_23_P144944	SMAD5	SMAD family member 5	0.00372663	2.09314	2.09314
NM_012112	A_23_P68610	TPX2	TPX2, microtubule-associated, homolog (Xenopus laevis)	0.000150321	0.265906	-3.76072
NM_015570	A_23_P122906	AUTS2	autism susceptibility candidate 2	0.0121531	0.345364	-2.89549
NM_000359	A_23_P65618	TGM1	transglutaminase 1 (K polypeptide epidermal type I, protein-glutamine-gamma-glutamyltransferase)	8.64745e-05	3.87112	3.87112
NM_198273	A_32_P86400	LYSMD3	LysM, putative peptidoglycan-binding, domain containing 3	0.0124868	3.11806	3.11806
NM_032320	A_23_P13438	BTBD10	BTB (POZ) domain containing 10	0.0121449	2.12098	2.12098
NM_003496	A_23_P94053	TRRAP	transformation/transcription domain-associated protein	0.00222182	0.493521	-2.02626
NM_000407	A_23_P29124	GP1BB	glycoprotein Ib (platelet), beta polypeptide	0.000160997	9.25693	9.25693
NM_032334	A_23_P157679	UTP23	UTP23, small subunit (SSU) processome component, homolog (yeast)	0.00394426	2.16993	2.16993
NM_005562	A_23_P201636	LAMC2	laminin, gamma 2	6.29809e-05	4.42926	4.42926
NM_001554	A_24_P370946	CYR61	cysteine-rich, angiogenic inducer, 61	8.96692e-05	2.67038	2.67038
NM_019018	A_32_P51848	FAM105A	family with sequence similarity 105, member A	0.00139761	2.3921	2.3921
NM_207371	A_32_P152767	C10orf140	chromosome 10 open reading frame 140	0.0070176	0.497987	-2.00808
NM_182597	A_24_P380679	C7orf53	chromosome 7 open reading frame 53	0.00333288	3.32104	3.32104
NM_006195	A_23_P71821	PBX3	pre-B-cell leukemia homeobox 3	0.00020707	0.276671	-3.6144
NM_004753	A_23_P33759	DHRS3	dehydrogenase/reductase (SDR family) member 3	0.000394405	3.6398	3.6398
NM_024776	A_24_P933802	PEAK1	NKF3 kinase family member	0.00012692	0.293297	-3.40951
NM_001613	A_23_P150053	ACTA2	actin, alpha 2, smooth muscle, aorta	7.31699e-05	4.08609	4.08609
NM_017812	A_32_P159150	CHCHD3	coiled-coil-helix-coiled-coil-helix domain containing 3	0.000107759	0.179042	-5.58529
NM_001287054	?	?	?	0.00686525	2.21376	2.21376
NM_153824	A_24_P204358	PYCR1	pyrroline-5-carboxylate reductase 1	0.00133271	0.389419	-2.56793
NM_002124	A_24_P343233	HLA-DRB1	major histocompatibility complex, class II, DR beta 1	0.000580997	0.363813	-2.74866
NM_001079935	A_23_P16110	OR7E24	olfactory receptor, family 7, subfamily E, member 24	0.00224815	0.45337	-2.20571
NM_032268	A_24_P262221	ZNRF1	zinc and ring finger 1	0.00410159	0.437187	-2.28735
A_24_P938006	?	?	?	0.000847524	0.442899	-2.25785
NM_001291964	?	?	?	0.000629547	0.473779	-2.11069
NM_030627	A_24_P58740	CPEB4	cytoplasmic polyadenylation element binding protein 4	0.000832571	6.46295	6.46295
NM_012482	A_23_P311087	ZNF281	zinc finger protein 281	0.0117932	2.63381	2.63381
NM_199190	A_32_P81334	LARP4	La ribonucleoprotein domain family, member 4	0.0119584	2.0037	2.0037
NM_013353	A_23_P126605	TMOD4	tropomodulin 4 (muscle)	0.00189707	2.86822	2.86822
NM_173636	A_23_P393766	WDR62	WD repeat domain 62	0.00439936	0.385359	-2.59498
NM_018412	A_24_P141019	ST7	suppression of tumorigenicity 7	0.000321439	0.204866	-4.88125
NM_022060	A_23_P205519	ABHD4	abhydrolase domain containing 4	0.000161631	3.60993	3.60993
NM_014291	A_23_P40657	GCAT	glycine C-acetyltransferase	0.00130048	0.455335	-2.19619
CN294989	A_24_P733308			0.00421657	0.451614	-2.21428
A_32_P19466	?	?	?	0.00136557	0.384591	-2.60017
NM_014622	A_23_P98455	VWA5A	von Willebrand factor A domain containing 5A	0.000124474	4.45247	4.45247
NM_032497	A_24_P284584	ZNF559	zinc finger protein 559	0.00409186	3.04357	3.04357
AK021546	A_24_P744818			0.0102421	2.86737	2.86737
NM_198679	A_23_P391764	RAPGEF1	Rap guanine nucleotide exchange factor (GEF) 1	0.00627364	0.488905	-2.04539
NM_017922	A_23_P163113	PRPF39	PRP39 pre-mRNA processing factor 39 homolog (S. cerevisiae)	0.00918366	2.39786	2.39786
NM_138290	A_23_P111724	RUNDC3B	RUN domain containing 3B	4.25068e-05	0.127791	-7.82529
NM_006167	A_23_P157545	NKX3-1	NK3 homeobox 1	5.07695e-05	2.72274	2.72274
NM_145309	A_24_P184388	LRTOMT	leucine rich transmembrane and 0-methyltransferase domain containing	0.00198502	0.458099	-2.18294
NM_030877	A_23_P68401	CTNNBL1	catenin, beta like 1	0.000500238	0.429462	-2.32849
A_24_P418744	?	?	?	0.000182951	2.31506	2.31506
NM_002892	A_24_P330309	ARID4A	AT rich interactive domain 4A (RBP1-like)	0.00690467	2.98428	2.98428
A_32_P155043	?	?	?	0.00390567	2.20652	2.20652
NM_018952	A_23_P66682	HOXB6	homeobox B6	0.00348889	0.464241	-2.15405
NM_001252124	A_23_P408239	PASK	PAS domain containing serine/threonine kinase	0.00354578	0.457445	-2.18606
AF086376	A_24_P928272			0.00665865	2.76234	2.76234
NM_032823	A_24_P89887	C9orf3	chromosome 9 open reading frame 3	0.00358254	0.402988	-2.48146
NM_144976	A_24_P14328	ZNF564	zinc finger protein 564	0.000384138	2.20304	2.20304
NM_201444	A_24_P84834	DGKA	diacylglycerol kinase, alpha 80kDa	0.00158991	2.41346	2.41346
NM_145305	A_24_P34100	SLC25A43	solute carrier family 25, member 43	2.65863e-05	0.43764	-2.28498
ENST00000367282	?	?	?	0.00591474	0.418464	-2.38969
THC2613527	A_24_P599496			0.00530695	0.444936	-2.24751
NM_006377	A_23_P253395	UNC13B	unc-13 homolog B (C. elegans)	0.000847656	0.431905	-2.31532
NM_194317	A_24_P37253	LYPD6	LY6/PLAUR domain containing 6	0.000468173	0.264701	-3.77784
NM_002201	A_23_P32404	ISG20	interferon stimulated exonuclease gene 20kDa	7.91426e-05	3.82484	3.82484
NM_138796	A_23_P346912	SPATA17	spermatogenesis associated 17	0.000117602	0.259965	-3.84667
NM_014791	A_23_P94422	MELK	maternal embryonic leucine zipper kinase	4.25545e-05	0.250005	-3.99993
NM_006230	A_23_P71146	POLD2	polymerase (DNA directed), delta 2, regulatory subunit 50kDa	0.000777948	0.446134	-2.24148
NM_080650	A_24_P56557	ATPBD4	ATP binding domain 4	0.000116341	0.345163	-2.89718
NM_000107	A_23_P52610	DDB2	damage-specific DNA binding protein 2, 48kDa	0.000425201	2.01712	2.01712
NM_000819	A_24_P239140	GART	phosphoribosylglycinamide formyltransferase, phosphoribosylglycinamide synthetase, phosphoribosylaminoimidazole synthetase	0.000378131	0.408206	-2.44974
NM_181805	A_23_P91221	PKIG	protein kinase (cAMP-dependent, catalytic) inhibitor gamma	0.000805098	0.425244	-2.35159
NM_001286458	?	?	?	0.00396948	0.422349	-2.36771
NM_022343	A_23_P414913	GLIPR2	GLI pathogenesis-related 2	0.00015961	3.69301	3.69301
NM_000044	A_23_P113111	AR	androgen receptor	0.00114763	0.202883	-4.92894
NM_001254	A_23_P49972	CDC6	cell division cycle 6 homolog (S. cerevisiae)	0.000230006	0.481669	-2.07612
NM_014314	A_23_P20814	DDX58	DEAD (Asp-Glu-Ala-Asp) box polypeptide 58	0.0105979	2.65283	2.65283
NM_002741	A_23_P67271	PKN1	protein kinase N1	0.00166721	0.404913	-2.46967
NM_019102	A_23_P93772	HOXA5	homeobox A5	0.00307436	2.9539	2.9539
ENST00000607754	?	?	?	0.00503174	2.34528	2.34528
NM_021809	A_23_P79794	TGIF2	TGFB-induced factor homeobox 2	0.00183159	0.446415	-2.24007
NM_001031695	A_23_P103099	RBFOX2	RNA binding protein, fox-1 homolog (C. elegans) 2	0.000421124	0.392038	-2.55077
NM_014266	A_23_P39386	HCST	hematopoietic cell signal transducer	0.000196441	2.35249	2.35249
NM_001015882	A_23_P397019	DNAJC25	DnaJ (Hsp40) homolog, subfamily C , member 25	0.00381166	2.418	2.418
AK092127	?	?	?	0.00171307	0.354732	-2.81903
THC2732746	A_32_P220591			0.00531189	0.364587	-2.74283
NM_033637	A_23_P46819	BTRC	beta-transducin repeat containing	0.000678467	0.412425	-2.42468
NM_032042	A_24_P111912	FAM172A	family with sequence similarity 172, member A	5.4376e-05	0.247026	-4.04815
NM_002392	A_24_P925664	MDM2	Mdm2 p53 binding protein homolog (mouse)	0.00114164	2.98036	2.98036
NM_133474	A_23_P335039	ZNF721	zinc finger protein 721	0.0124927	3.69718	3.69718
NM_006907	A_23_P130194	PYCR1	pyrroline-5-carboxylate reductase 1	0.0013214	0.481509	-2.07681
NM_004568	A_24_P838743	SERPINB6	serpin peptidase inhibitor, clade B (ovalbumin), member 6	0.000635975	0.49007	-2.04052
NM_144999	A_23_P381461	LRRC45	leucine rich repeat containing 45	0.00325128	0.463941	-2.15545
A_24_P247303	?	?	?	0.00139167	0.498293	-2.00685
NM_006113	A_24_P7950	VAV3	vav 3 guanine nucleotide exchange factor	0.000538977	0.391322	-2.55544
A_24_P306814	?	?	?	0.000770517	0.293278	-3.40974
NM_020362	A_23_P200073	PITHD1	PITH (C-terminal proteasome-interacting domain of thioredoxin-like) domain containing 1	0.00038037	2.23403	2.23403
A_24_P178444	?	?	?	0.0012908	0.323895	-3.08742
NM_018075	A_23_P6688	ANO10	anoctamin 10	0.000326027	0.482968	-2.07053
A_24_P418498	?	?	?	0.000859146	0.495661	-2.01751
NM_016255	A_24_P337575	FAM8A1	family with sequence similarity 8, member A1	0.0026781	2.12993	2.12993
NM_002309	A_24_P233488	LIF	leukemia inhibitory factor (cholinergic differentiation factor)	0.000280849	12.618	12.618
NM_199330	A_23_P99906	HOMER2	homer homolog 2 (Drosophila)	0.000402074	0.458588	-2.18061
NM_001080479	A_23_P81298	RGNEF	190 kDa guanine nucleotide exchange factor	0.00185625	0.237087	-4.21786
NM_001122772	A_24_P244495	AGAP2	ArfGAP with GTPase domain, ankyrin repeat and PH domain 2	0.0103002	0.480813	-2.07981
NM_020247	A_23_P85598	ADCK3	aarF domain containing kinase 3	0.000211002	2.88155	2.88155
NM_002689	A_23_P161615	POLA2	polymerase (DNA directed), alpha 2 (70kD subunit)	0.00136363	0.370274	-2.7007
NM_007274	A_24_P205589	ACOT7	acyl-CoA thioesterase 7	0.00153846	0.426191	-2.34636
NR_027282	A_32_P17364	LOC399815	chromosome 10 open reading frame 88 pseudogene	0.00650107	2.43282	2.43282
NM_001242348	A_32_P163392	LOC100287177	uncharacterized LOC100287177	0.000161357	3.97104	3.97104
NM_001128159	A_24_P279489	VPS53	vacuolar protein sorting 53 homolog (S. cerevisiae)	0.00335439	0.401947	-2.48789
NM_001291324	?	?	?	0.00602567	0.458815	-2.17953
NM_016448	A_23_P10385	DTL	denticleless homolog (Drosophila)	0.000164268	0.187583	-5.33096
NM_022113	A_23_P214111	KIF13A	kinesin family member 13A	0.00348308	0.321272	-3.11263
NM_016235	A_23_P324327	GPRC5B	G protein-coupled receptor, family C, group 5, member B	0.000945439	0.418254	-2.39089
NM_018024	A_23_P71415	WDYHV1	WDYHV motif containing 1	0.00028946	0.498038	-2.00788
NM_001033719	A_23_P90333	ZNF404	zinc finger protein 404	0.00436199	3.40261	3.40261
NM_004185	A_23_P138352	WNT2B	wingless-type MMTV integration site family, member 2B	0.000311928	0.221943	-4.50566
NM_001562	A_23_P104798	IL18	interleukin 18 (interferon-gamma-inducing factor)	0.00139405	2.33918	2.33918
ENST00000504107	A_32_P115717			0.000474772	0.223711	-4.47006
NM_001282130	?	?	?	0.00273661	0.245564	-4.07225
NM_004869	A_24_P322369	VPS4B	vacuolar protein sorting 4 homolog B (S. cerevisiae)	0.00919147	2.05351	2.05351
NM_030928	A_24_P176374	CDT1	chromatin licensing and DNA replication factor 1	0.00341858	0.395295	-2.52976
NM_198709	A_24_P205213	ARSB	arylsulfatase B	0.00156774	0.4081	-2.45038
A_24_P358606	?	?	?	0.000883063	0.297164	-3.36515
NM_006965	A_24_P920188	ZNF24	zinc finger protein 24	0.0112044	2.87847	2.87847
NM_022470	A_23_P113283	ZMAT3	zinc finger, matrin-type 3	0.00514672	4.32816	4.32816
NM_000094	A_23_P144071	COL7A1	collagen, type VII, alpha 1	0.000110794	5.97706	5.97706
NR_027277	A_24_P698141	LOC344967	acyl-CoA thioesterase 7 pseudogene	0.00411372	0.460829	-2.17
THC2672076	A_24_P911191			0.00701113	0.499625	-2.0015
NM_002518	A_23_P415984	NPAS2	neuronal PAS domain protein 2	0.0067503	0.414387	-2.4132
NM_000461	A_23_P80449	THRB	thyroid hormone receptor, beta	0.00310116	0.355336	-2.81424
NM_013360	A_24_P165082	ZNF222	zinc finger protein 222	0.0070976	2.43525	2.43525
NM_000700	A_23_P94501	ANXA1	annexin A1	0.00524647	4.13576	4.13576
BE049152	A_32_P119154			0.00159719	0.31652	-3.15936
BC008476	A_24_P741023			0.00710351	3.94626	3.94626
A_23_P20793	?	?	?	0.000631879	0.387544	-2.58035
NM_018017	A_24_P942694	C10orf118	chromosome 10 open reading frame 118	0.00818869	6.16023	6.16023
NM_021077	A_23_P88522	NMB	neuromedin B	0.000128817	2.36783	2.36783
NM_004203	A_23_P398515	PKMYT1	protein kinase, membrane associated tyrosine/threonine 1	0.00202515	0.351898	-2.84173
NM_004148	A_23_P169137	NINJ1	ninjurin 1	0.000125179	2.14251	2.14251
NM_022129	A_24_P112395	PBLD	phenazine biosynthesis-like protein domain containing	0.00188569	2.38461	2.38461
NM_015506	A_24_P83586	MMACHC	methylmalonic aciduria (cobalamin deficiency) cblC type, with homocystinuria	0.00525251	0.364503	-2.74346
NM_023073	A_32_P226009	C5orf42	chromosome 5 open reading frame 42	0.0040221	2.57241	2.57241
NM_134427	A_23_P219197	RGS3	regulator of G-protein signaling 3	0.00467969	0.303594	-3.29387
NM_203473	A_23_P11071	PORCN	porcupine homolog (Drosophila)	0.0001635	3.21414	3.21414
NR_110845	?	?	?	0.00492942	0.43793	-2.28347
NM_017750	A_23_P209944	RETSAT	retinol saturase (all-trans-retinol 13,14-reductase)	0.000557515	4.18143	4.18143
NM_001145028	A_32_P198177	PALM3	paralemmin 3	0.00204517	0.356706	-2.80343
NM_012138	A_24_P262395	AATF	apoptosis antagonizing transcription factor	0.000509999	0.473983	-2.10978
NM_003353	A_24_P62883	UCN	urocortin	0.000997514	3.09742	3.09742
NM_015955	A_32_P143880	MEMO1	mediator of cell motility 1	2.73361e-05	0.474977	-2.10536
NM_023915	A_23_P121120	GPR87	G protein-coupled receptor 87	0.00053912	13.4009	13.4009
NM_001199866	A_23_P28906	KIF16B	kinesin family member 16B	0.000169106	0.231093	-4.32727
NM_006681	A_23_P69537	NMU	neuromedin U	0.000274781	0.177468	-5.63481
NM_020692	A_23_P76749	GALNTL1	UDP-N-acetyl-alpha-D-galactosamine:polypeptide N-acetylgalactosaminyltransferase-like 1	0.00679181	0.312277	-3.20228
NM_001145204	A_32_P115515	SHISA9	shisa homolog 9 (Xenopus laevis)	0.000788155	0.405672	-2.46504
NM_138795	A_23_P415033	ARL8A	ADP-ribosylation factor-like 8A	5.0092e-05	2.17051	2.17051
NM_138364	A_23_P41541	PRMT10	protein arginine methyltransferase 10 (putative)	0.00316869	2.69065	2.69065
NM_001605	A_24_P172990	AARS	alanyl-tRNA synthetase	0.00141608	0.376903	-2.65321
NM_001621	A_23_P215566	AHR	aryl hydrocarbon receptor	0.00177566	3.1266	3.1266
NM_032772	A_23_P202484	ZNF503	zinc finger protein 503	0.000896677	2.11423	2.11423
AK001405	A_24_P927679			0.000686769	3.19633	3.19633
NM_005168	A_23_P142849	RND3	Rho family GTPase 3	0.00543632	3.04578	3.04578
NM_016490	A_24_P231546	FAM178B	family with sequence similarity 178, member B	0.00474928	0.487484	-2.05135
NM_018725	A_24_P157370	IL17RB	interleukin 17 receptor B	0.000660238	0.497193	-2.01129
NM_013352	A_23_P19226	DSE	dermatan sulfate epimerase	0.00382099	2.14142	2.14142
NM_015024	A_23_P146237	XPO7	exportin 7	0.000623501	0.459089	-2.17823
NM_019605	A_23_P318904	SERTAD4	SERTA domain containing 4	0.000199029	0.27748	-3.60387
NM_024678	A_23_P24960	NARS2	asparaginyl-tRNA synthetase 2, mitochondrial (putative)	3.43936e-05	0.378815	-2.63981
A_32_P132169	?	?	?	5.64029e-05	0.310216	-3.22356
NM_018482	A_23_P71526	ASAP1	ArfGAP with SH3 domain, ankyrin repeat and PH domain 1	0.00312108	0.338643	-2.95296
NM_138705	A_23_P62588	CALML6	calmodulin-like 6	0.00305241	2.94352	2.94352
NM_021260	A_24_P287503	ZFYVE1	zinc finger, FYVE domain containing 1	0.000135627	3.05029	3.05029
NM_005444	A_23_P318039	RQCD1	RCD1 required for cell differentiation1 homolog (S. pombe)	0.000433768	0.498214	-2.00717
NM_022766	A_24_P62237	CERK	ceramide kinase	0.00127254	0.312018	-3.20495
NM_080546	A_23_P411806	SLC44A1	solute carrier family 44, member 1	0.000130473	0.41781	-2.39343
NM_004596	A_24_P250335	SNRPA	small nuclear ribonucleoprotein polypeptide A	0.00187091	0.425262	-2.35149
A_24_P471242	?	?	?	0.00330903	0.470087	-2.12727
NM_001199290	A_24_P923102	PHOSPHO2-KLHL23	PHOSPHO2-KLHL23 readthrough	0.00123436	0.497172	-2.01138
NM_000422	A_23_P96158	KRT17	keratin 17	6.38229e-05	5.33755	5.33755
NM_031206	A_23_P256021	LAS1L	LAS1-like (S. cerevisiae)	0.0023283	0.497304	-2.01084
ENST00000333750	A_32_P462013	EFCAB4B	EF-hand calcium binding domain 4B	0.000841838	0.294107	-3.40012
BC107568	?	?	?	0.000747642	0.321335	-3.11202
XR_253463	?	?	?	0.0128059	0.336584	-2.97102
NM_133467	A_32_P209230	CITED4	Cbp/p300-interacting transactivator, with Glu/Asp-rich carboxy-terminal domain, 4	0.00380404	0.340277	-2.93878
ENST00000390542	A_32_P200144			0.000349895	4.75774	4.75774
A_24_P647682	?	?	?	0.00166847	0.386566	-2.58688
NM_004425	A_23_P160559	ECM1	extracellular matrix protein 1	0.000135851	5.07034	5.07034
NM_032013	A_24_P185604	NDRG3	NDRG family member 3	0.00217742	0.441614	-2.26442
NM_001271872	?	?	?	0.000527094	0.297892	-3.35692
NM_001122	A_23_P134953	PLIN2	perilipin 2	0.000677438	2.36989	2.36989
NR_002323	A_24_P382724	TUG1	taurine upregulated 1 (non-protein coding)	0.00723999	2.71202	2.71202
NM_003439	A_23_P388553	ZKSCAN1	zinc finger with KRAB and SCAN domains 1	0.0117604	2.32128	2.32128
NM_016608	A_23_P22682	ARMCX1	armadillo repeat containing, X-linked 1	0.00344555	2.01182	2.01182
NM_018293	A_23_P147801	ZNF654	zinc finger protein 654	0.00661831	2.46101	2.46101
NM_032818	A_24_P30034	C9orf100	chromosome 9 open reading frame 100	0.000614767	0.308772	-3.23864
NM_144661	A_23_P1286	C10orf82	chromosome 10 open reading frame 82	0.00193986	0.266535	-3.75185
NM_003083	A_23_P67228	SNAPC2	small nuclear RNA activating complex, polypeptide 2, 45kDa	0.00721559	0.493172	-2.02769
ENST00000272427	A_32_P16258	EXOC6B	exocyst complex component 6B	0.000477752	0.445995	-2.24218
NM_005715	A_23_P314145	UST	uronyl-2-sulfotransferase	0.000659481	0.205513	-4.86587
NM_005624	A_23_P55828	CCL25	chemokine (C-C motif) ligand 25	0.000624445	3.42251	3.42251
NM_004609	A_24_P199121	TCF15	transcription factor 15 (basic helix-loop-helix)	0.000384212	2.29303	2.29303
NM_001136198	A_23_P142325	FZR1	fizzy/cell division cycle 20 related 1 (Drosophila)	0.000410872	2.25627	2.25627
NR_027451	A_32_P71437	LOC647979	uncharacterized LOC647979	0.00933181	2.78929	2.78929
NM_173626	A_23_P125078	SLC26A11	solute carrier family 26, member 11	6.15626e-05	3.01091	3.01091
NM_004982	A_23_P64879	KCNJ8	potassium inwardly-rectifying channel, subfamily J, member 8	0.00212456	0.193457	-5.16911
NM_004442	A_23_P200067	EPHB2	EPH receptor B2	0.00457199	0.396463	-2.52231
NM_000791	A_32_P211045	DHFR	dihydrofolate reductase	0.000120052	0.386501	-2.58732
NM_144973	A_24_P541919	DENND5B	DENN/MADD domain containing 5B	0.000637603	0.478124	-2.09151
THC2701341	?	?	?	0.000946934	4.28619	4.28619
AL832534	A_23_P28307			0.00113923	0.315199	-3.1726
NM_152279	A_23_P90223	ZNF585B	zinc finger protein 585B	0.00802283	2.67773	2.67773
NM_005915	A_23_P90612	MCM6	minichromosome maintenance complex component 6	0.000369632	0.418065	-2.39197
A_32_P149735	?	?	?	0.00555997	0.43905	-2.27765
NM_016320	A_24_P141522	NUP98	nucleoporin 98kDa	0.00165854	0.40906	-2.44463
NM_016055	A_23_P162106	MRPL48	mitochondrial ribosomal protein L48	0.000419601	0.456092	-2.19254
NM_000717	A_23_P4096	CA4	carbonic anhydrase IV	0.0029198	0.335363	-2.98184
NM_012134	A_23_P201940	LMOD1	leiomodin 1 (smooth muscle)	0.00419262	0.278008	-3.59702
NM_172229	A_23_P77612	KREMEN2	kringle containing transmembrane protein 2	0.00362828	0.440394	-2.27069
NM_181726	A_24_P237586	ANKRD37	ankyrin repeat domain 37	0.000919323	2.36454	2.36454
THC2621771	A_32_P6972			0.00265786	2.33544	2.33544
A_32_P53260	?	?	?	0.00135503	0.269346	-3.7127
NM_024511	A_23_P41512	HAUS3	HAUS augmin-like complex, subunit 3	0.00429737	3.14761	3.14761
NM_181578	A_23_P95302	RFC5	replication factor C (activator 1) 5, 36.5kDa	0.000391955	0.423911	-2.35899
NM_018193	A_32_P95729	FANCI	Fanconi anemia, complementation group I	7.43644e-05	0.325339	-3.07371
NM_032636	A_23_P46539	PSRC1	proline/serine-rich coiled-coil 1	0.00123712	0.25085	-3.98645
NM_001001974	A_24_P269814	PLEKHA1	pleckstrin homology domain containing, family A (phosphoinositide binding specific) member 1	0.00906024	2.10726	2.10726
NM_001482	A_23_P129064	GATM	glycine amidinotransferase (L-arginine:glycine amidinotransferase)	0.00080509	0.418946	-2.38694
NM_018166	A_23_P62831	FAM176B	family with sequence similarity 176, member B	0.000104941	2.21503	2.21503
A_24_P33055	?	?	?	0.00187919	0.278828	-3.58644
NM_133631	A_24_P77432	ROBO1	roundabout, axon guidance receptor, homolog 1 (Drosophila)	9.32401e-05	0.159067	-6.28667
NM_004997	A_23_P148737	MYBPH	myosin binding protein H	0.000316905	4.52373	4.52373
NM_198833	A_23_P4561	SERPINB8	serpin peptidase inhibitor, clade B (ovalbumin), member 8	0.00018371	4.54444	4.54444
THC2762149	A_24_P671842			0.000435295	0.423111	-2.36345
THC2685750	?	?	?	0.00283691	0.256393	-3.90027
NM_014657	A_24_P327499	TTI1	TELO2 interacting protein 1	0.00201012	0.494991	-2.02024
ENST00000609194	?	?	?	0.00308767	0.460872	-2.1698
NM_173728	A_23_P49674	ARHGEF15	Rho guanine nucleotide exchange factor (GEF) 15	0.000616023	2.14582	2.14582
NM_198551	A_24_P256692	MIA3	melanoma inhibitory activity family, member 3	0.00873019	2.52574	2.52574
NM_001031801	A_24_P353300	LIMK2	LIM domain kinase 2	0.000149687	3.42236	3.42236
NM_014028	A_32_P154830	OSTM1	osteopetrosis associated transmembrane protein 1	0.0127495	3.2245	3.2245
ENST00000525811	?	?	?	0.00505293	0.388364	-2.57491
NM_020421	A_23_P25945	ADCK1	aarF domain containing kinase 1	0.00645548	0.473866	-2.1103
NM_021723	A_24_P355006	ADAM22	ADAM metallopeptidase domain 22	0.00034342	0.399636	-2.50228
A_32_P19460	?	?	?	0.00103456	0.320894	-3.11629
A_32_P164477	?	?	?	0.000263617	3.45463	3.45463
ENST00000596691	?	?	?	0.0104466	0.448858	-2.22788
NM_016447	A_23_P71053	MPP6	membrane protein, palmitoylated 6 (MAGUK p55 subfamily member 6)	0.000200694	0.451515	-2.21476
NM_000815	A_23_P309720	GABRD	gamma-aminobutyric acid (GABA) A receptor, delta	0.000187979	5.37002	5.37002
ENST00000525173	A_32_P26800			0.00227068	2.02993	2.02993
NM_018341	A_32_P129530	C6orf70	chromosome 6 open reading frame 70	0.00149668	2.04139	2.04139
NM_002383	A_23_P33436	MAZ	MYC-associated zinc finger protein (purine-binding transcription factor)	0.0030641	0.469049	-2.13197
NM_021144	A_23_P256384	PSIP1	PC4 and SFRS1 interacting protein 1	0.000120138	0.349729	-2.85936
ENST00000367001	A_24_P937095	SLC30A1	solute carrier family 30 (zinc transporter), member 1	0.00531455	5.82203	5.82203
NM_145006	A_23_P401076	SUSD3	sushi domain containing 3	0.00570783	0.310484	-3.22078
NM_019036	A_32_P49508	HMGCLL1	3-hydroxymethyl-3-methylglutaryl-CoA lyase-like 1	0.000169559	0.135045	-7.40492
TCONS_00024914	?	?	?	0.000142739	3.72309	3.72309
A_32_P78488	?	?	?	0.00183409	0.298789	-3.34685
NM_030647	A_23_P359897	JHDM1D	jumonji C domain containing histone demethylase 1 homolog D (S. cerevisiae)	0.00875661	3.48013	3.48013
THC2654127	A_32_P150263			0.000512301	0.291554	-3.4299
NM_001395	A_24_P417189	DUSP9	dual specificity phosphatase 9	0.009226	0.481068	-2.07871
NM_018154	A_23_P119254	ASF1B	ASF1 anti-silencing function 1 homolog B (S. cerevisiae)	0.00110545	0.403602	-2.47769
NM_203391	A_24_P100387	GK	glycerol kinase	0.000220841	0.350112	-2.85623
NM_199054	A_24_P929754	MKNK2	MAP kinase interacting serine/threonine kinase 2	0.000341913	2.9321	2.9321
NM_014677	A_24_P332816	RIMS2	regulating synaptic membrane exocytosis 2	0.000293339	0.282092	-3.54494
NM_152718	A_23_P52986	VWCE	von Willebrand factor C and EGF domains	0.00020312	14.3997	14.3997
AL571926	A_32_P96933			0.00807226	2.12923	2.12923
BX101711	A_32_P190211			0.000624988	0.110404	-9.05765
NM_018179	A_24_P923757	ATF7IP	activating transcription factor 7 interacting protein	0.000258378	0.448024	-2.23203
AJ227863	A_24_P925361			0.00683088	3.71998	3.71998
NM_015261	A_32_P71447	NCAPD3	non-SMC condensin II complex, subunit D3	0.000223014	0.421646	-2.37166
THC2753543	A_32_P32463			0.00383457	0.305134	-3.27725
NM_020727	A_24_P339869	ZNF295	zinc finger protein 295	0.00611784	3.63175	3.63175
AK021772	A_23_P3922	FLJ11710	uncharacterized protein FLJ11710	0.0001178	2.28134	2.28134
NM_006054	A_23_P76684	RTN3	reticulon 3	0.000370174	0.443285	-2.25588
NM_007195	A_23_P306890	POLI	polymerase (DNA directed) iota	0.0103616	2.42051	2.42051
ENST00000598340	?	?	?	0.00169619	2.20586	2.20586
NM_003670	A_24_P268676	BHLHE40	basic helix-loop-helix family, member e40	0.000376815	4.05214	4.05214
NM_182687	A_24_P105102	PKMYT1	protein kinase, membrane associated tyrosine/threonine 1	0.00234265	0.367173	-2.72351
S73202	A_24_P929818			0.00145659	0.318565	-3.13908
NM_005687	A_23_P165355	FARSB	phenylalanyl-tRNA synthetase, beta subunit	8.81947e-05	0.480908	-2.0794
BG951379	A_32_P217911			0.00257775	0.428502	-2.33371
NM_030824	A_23_P101476	ZNF442	zinc finger protein 442	0.00683504	2.7387	2.7387
NM_019593	A_24_P31671	GPCPD1	glycerophosphocholine phosphodiesterase GDE1 homolog (S. cerevisiae)	0.00265524	4.49513	4.49513
NM_022041	A_23_P88873	GAN	gigaxonin	0.00769873	2.32988	2.32988
THC2517558	A_23_P208579			0.00109611	2.50983	2.50983
NM_152715	A_23_P410017	TBCEL	tubulin folding cofactor E-like	0.011289	2.02095	2.02095
NM_001444	A_32_P204676	FABP5	fatty acid binding protein 5 (psoriasis-associated)	0.000304952	0.427856	-2.33724
NM_006244	A_23_P35796	PPP2R5B	protein phosphatase 2, regulatory subunit B', beta	0.00024403	3.1436	3.1436
A_24_P101742	?	?	?	0.00204066	0.32577	-3.06965
NM_001080412	A_24_P221323	ZBTB38	zinc finger and BTB domain containing 38	0.0120022	3.30469	3.30469
NM_004878	A_24_P403417	PTGES	prostaglandin E synthase	0.00101299	3.68672	3.68672
A_24_P367100	?	?	?	0.00160689	0.309215	-3.234
NM_198920	A_24_P626931	UBE2CBP	ubiquitin-conjugating enzyme E2C binding protein	0.00119567	0.287503	-3.47823
BX099961	A_32_P215143			0.00433045	0.371301	-2.69323
NM_178014	A_32_P78528	TUBB	tubulin, beta class I	0.00195928	0.462171	-2.1637
NM_152486	A_24_P402510	SAMD11	sterile alpha motif domain containing 11	0.00379729	0.314351	-3.18115
NM_013390	A_24_P261125	TMEM2	transmembrane protein 2	0.00040787	2.31993	2.31993
NM_030912	A_23_P46844	TRIM8	tripartite motif containing 8	4.85718e-05	2.11525	2.11525
NM_001199803	A_24_P276888	CENPO	centromere protein O	0.003046	0.381108	-2.62393
NM_020307	A_24_P337058	CCNL1	cyclin L1	0.00172549	2.98028	2.98028
NM_005103	A_24_P201552	FEZ1	fasciculation and elongation protein zeta 1 (zygin I)	0.00642248	0.469807	-2.12853
NR_026869	A_24_P296274	LINC00052	long intergenic non-protein coding RNA 52	0.000443959	0.347626	-2.87666
NM_003128	A_23_P102523	SPTBN1	spectrin, beta, non-erythrocytic 1	0.00162187	0.491829	-2.03323
A_24_P401051	?	?	?	0.00347201	0.294346	-3.39737
NM_016656	A_23_P73721	RRAGB	Ras-related GTP binding B	0.00548534	2.10345	2.10345
NR_038386	A_24_P456723	LOC728537	uncharacterized LOC728537	6.16373e-05	2.76293	2.76293
NM_138924	A_24_P19228	GAMT	guanidinoacetate N-methyltransferase	0.000319524	3.13426	3.13426
NM_013398	A_24_P36285	ZNF224	zinc finger protein 224	0.00514693	2.35877	2.35877
NM_021052	A_23_P59045	HIST1H2AE	histone cluster 1, H2ae	0.000373061	2.25694	2.25694
NM_001012302	A_24_P8109	ANO9	anoctamin 9	0.000830555	3.09321	3.09321
NR_023389	A_32_P104518	LINC00476	long intergenic non-protein coding RNA 476	0.00165641	3.0006	3.0006
NM_017790	A_24_P377775	RGS3	regulator of G-protein signaling 3	0.0105396	0.351801	-2.84252
NM_001010862	A_24_P494454	SPIN3	spindlin family, member 3	0.00323449	2.10058	2.10058
A_24_P307046	?	?	?	0.0036111	0.441474	-2.26514
NM_001291291	?	?	?	0.00209055	0.458989	-2.1787
XM_005273665	?	?	?	0.0129488	0.432183	-2.31384
NM_000050	A_23_P31921	ASS1	argininosuccinate synthase 1	0.00208178	0.293419	-3.4081
NM_144720	A_23_P144274	JAKMIP1	janus kinase and microtubule interacting protein 1	0.00707969	0.243935	-4.09946
NM_005940	A_23_P57417	MMP11	matrix metallopeptidase 11 (stromelysin 3)	0.00510236	2.09368	2.09368
NM_018186	A_23_P11862	C1orf112	chromosome 1 open reading frame 112	0.00178767	0.349149	-2.8641
A_24_P900555	?	?	?	0.0027459	0.289668	-3.45223
NM_024782	A_24_P251381	NHEJ1	nonhomologous end-joining factor 1	0.00335332	0.442997	-2.25735
NM_024081	A_24_P47329	PRRG4	proline rich Gla (G-carboxyglutamic acid) 4 (transmembrane)	0.00243853	2.12781	2.12781
NM_017818	A_23_P137361	WRAP73	WD repeat containing, antisense to TP73	0.000369719	2.25123	2.25123
NM_001042539	A_23_P33433	MAZ	MYC-associated zinc finger protein (purine-binding transcription factor)	0.004406	0.488785	-2.04589
NM_001013703	A_23_P54540	EIF2AK4	eukaryotic translation initiation factor 2 alpha kinase 4	0.000418192	0.493057	-2.02816
NM_173854	A_24_P122732	SLC41A1	solute carrier family 41, member 1	0.000106371	2.56887	2.56887
NM_130469	A_23_P117582	JDP2	Jun dimerization protein 2	0.00750383	0.372554	-2.68417
NM_014734	A_23_P371787	KIAA0247	KIAA0247	3.28442e-05	2.73403	2.73403
NM_002456	A_23_P137856	MUC1	mucin 1, cell surface associated	0.0127313	0.254807	-3.92454
NM_203314	A_23_P29754	BDH1	3-hydroxybutyrate dehydrogenase, type 1	0.00215496	0.434595	-2.30099
NM_003088	A_23_P168532	FSCN1	fascin homolog 1, actin-bundling protein (Strongylocentrotus purpuratus)	0.000493728	3.4204	3.4204
NM_001098845	?	?	?	0.000600719	3.01523	3.01523
NM_012334	A_24_P46357	MYO10	myosin X	0.00194423	0.469021	-2.1321
NM_001012971	A_24_P323941	C20orf106	chromosome 20 open reading frame 106	0.00244029	2.53913	2.53913
BC013418	A_23_P340909	SKA3	spindle and kinetochore associated complex subunit 3	0.000330855	0.290148	-3.44652
NM_002833	A_23_P124486	PTPN9	protein tyrosine phosphatase, non-receptor type 9	0.00609875	0.447947	-2.23241
NM_022910	A_23_P140748	NDRG4	NDRG family member 4	0.000752883	3.45225	3.45225
NR_002809	A_23_P116743	LOC338799	uncharacterized LOC338799	0.00196467	2.45267	2.45267
ENST00000376108	A_23_P369210	CLCN5	chloride channel 5	0.00528968	0.422663	-2.36595
NM_003728	A_32_P36511	UNC5C	unc-5 homolog C (C. elegans)	0.00231908	0.15734	-6.35565
THC2719959	A_32_P191074			0.00768678	2.18571	2.18571
NR_038256	A_32_P62276	LOC100507206	uncharacterized LOC100507206	0.00212249	0.12303	-8.12811
NM_004603	A_24_P226541	STX1A	syntaxin 1A (brain)	8.95779e-05	2.49119	2.49119
A_32_P146394	?	?	?	0.0119055	3.17783	3.17783
NM_005503	A_23_P158231	APBA2	amyloid beta (A4) precursor protein-binding, family A, member 2	0.0066097	0.4596	-2.17581
NM_002315	A_23_P87310	LMO1	LIM domain only 1 (rhombotin 1)	0.00732988	0.352895	-2.83371
ENST00000567292	?	?	?	0.00988889	0.461503	-2.16683
NM_006460	A_24_P356601	HEXIM1	hexamethylene bis-acetamide inducible 1	0.000215756	2.28617	2.28617
NM_001039614	A_32_P210168	C15orf59	chromosome 15 open reading frame 59	0.00861048	0.403155	-2.48044
NM_000693	A_23_P205959	ALDH1A3	aldehyde dehydrogenase 1 family, member A3	0.00182018	4.17488	4.17488
BG327427	A_32_P53633			0.00139834	2.62775	2.62775
THC2520108	A_32_P204722			0.000681289	0.434161	-2.30329
NM_013277	A_32_P186474	RACGAP1	Rac GTPase activating protein 1	0.000842576	0.366639	-2.72748
NM_003775	A_23_P119502	S1PR4	sphingosine-1-phosphate receptor 4	0.000296538	3.05672	3.05672
TCONS_00024522	?	?	?	0.000136436	3.74988	3.74988
NM_182705	A_24_P32151	FAM101B	family with sequence similarity 101, member B	0.0108132	0.458612	-2.18049
NM_033306	A_23_P35912	CASP4	caspase 4, apoptosis-related cysteine peptidase	0.00032261	2.09599	2.09599
THC2672361	A_32_P101039			0.0047871	2.39598	2.39598
NM_032997	A_23_P63789	ZWINT	ZW10 interactor	0.000268038	0.385998	-2.59068
NM_170677	A_23_P88602	MEIS2	Meis homeobox 2	0.000755384	0.279868	-3.57312
NM_001039535	A_24_P322354	SKA1	spindle and kinetochore associated complex subunit 1	0.00192308	0.363497	-2.75105
NM_024562	A_24_P256579	TMCO7	transmembrane and coiled-coil domains 7	0.00500798	0.396457	-2.52234
NM_033343	A_23_P23869	LHX4	LIM homeobox 4	0.00620159	0.263631	-3.79319
NM_006231	A_23_P159355	POLE	polymerase (DNA directed), epsilon	0.00384793	0.360902	-2.77083
AK001891	A_23_P207307	PRR11	proline rich 11	0.00198694	0.407845	-2.45191
NM_001134673	A_32_P155030	NFIA	nuclear factor I/A	0.000523919	0.256456	-3.8993
NM_018340	A_24_P634530	CPPED1	calcineurin-like phosphoesterase domain containing 1	0.000271455	0.444717	-2.24862
AK092032	A_24_P538590	LOC100506469	uncharacterized LOC100506469	0.0127032	0.425499	-2.35018
NR_001578	A_24_P334845	TDH	L-threonine dehydrogenase	0.0120298	0.49063	-2.0382
AL832820	A_32_P220523			0.00818204	3.3395	3.3395
XR_243465	?	?	?	0.00244977	0.435653	-2.29541
NM_001164380	A_24_P374634	STAU2	staufen, RNA binding protein, homolog 2 (Drosophila)	0.000655067	0.173113	-5.77656
NM_007069	A_23_P116414	PLA2G16	phospholipase A2, group XVI	0.00787739	0.464958	-2.15073
NM_153257	A_23_P67424	ZNF461	zinc finger protein 461	0.00200925	2.13557	2.13557
NM_176869	A_24_P214625	PPA2	pyrophosphatase (inorganic) 2	0.000128822	0.407583	-2.45349
NM_018231	A_24_P270688	SLC38A7	solute carrier family 38, member 7	0.000655178	2.33558	2.33558
NM_017899	A_23_P76538	TESC	tescalcin	0.00510253	0.388095	-2.57669
ENST00000536061	A_24_P153542			0.00593437	0.448385	-2.23023
NM_020666	A_24_P123521	CLK4	CDC-like kinase 4	0.00360861	2.95524	2.95524
NM_203349	A_32_P234145	SHC4	SHC (Src homology 2 domain containing) family, member 4	0.00235269	4.00363	4.00363
NM_178865	A_24_P145629	SERINC2	serine incorporator 2	0.000306893	3.54962	3.54962
NM_181519	A_32_P179177	SYT15	synaptotagmin XV	0.00170982	0.413796	-2.41665
NM_002359	A_23_P78209	MAFG	v-maf musculoaponeurotic fibrosarcoma oncogene homolog G (avian)	0.000135157	2.05556	2.05556
NM_014650	A_23_P208210	ZNF432	zinc finger protein 432	0.0046252	2.35853	2.35853
NM_001003940	A_23_P379649	BMF	Bcl2 modifying factor	0.00733742	0.299861	-3.33488
NM_003165	A_24_P201171	STXBP1	syntaxin binding protein 1	0.00722751	0.428357	-2.3345
NM_001139	A_23_P83634	ALOX12B	arachidonate 12-lipoxygenase, 12R type	0.00926218	2.57494	2.57494
NM_020815	A_23_P170238	PCDH10	protocadherin 10	0.00888296	0.330013	-3.03019
NM_017842	A_24_P309594	SLC48A1	solute carrier family 48 (heme transporter), member 1	0.000136267	2.08893	2.08893
NM_153697	A_23_P209347	ANKRD44	ankyrin repeat domain 44	0.00286114	0.495893	-2.01657
NM_017908	A_24_P349676	ZNF446	zinc finger protein 446	6.55093e-05	2.18182	2.18182
NM_015009	A_23_P21618	PDZRN3	PDZ domain containing ring finger 3	0.00524387	0.372357	-2.68559
NM_138340	A_23_P305759	ABHD3	abhydrolase domain containing 3	0.005119	2.5689	2.5689
A_24_P187355	?	?	?	0.00598737	0.48034	-2.08186
NM_145279	A_24_P225339	MOB3C	MOB kinase activator 3C	2.2084e-05	2.57532	2.57532
NM_003541	A_23_P30813	HIST1H4K	histone cluster 1, H4k	0.00229548	0.459241	-2.17751
NM_013290	A_24_P287941	PSMC3IP	PSMC3 interacting protein	0.00182732	0.489427	-2.0432
AK097197	A_24_P937319	HGS	hepatocyte growth factor-regulated tyrosine kinase substrate	0.000205321	2.37358	2.37358
THC2639487	A_32_P55987			0.0125491	2.76616	2.76616
NM_001033553	A_24_P943095	SPECC1	sperm antigen with calponin homology and coiled-coil domains 1	0.00296258	0.493266	-2.02731
NM_003341	A_23_P6963	UBE2E1	ubiquitin-conjugating enzyme E2E 1	0.00524121	0.480355	-2.08179
NM_001031738	A_24_P291401	TMEM150A	transmembrane protein 150A	0.000174696	3.85478	3.85478
NM_005629	A_24_P23400	SLC6A8	solute carrier family 6 (neurotransmitter transporter, creatine), member 8	0.000193306	3.21993	3.21993
NM_003862	A_23_P93027	FGF18	fibroblast growth factor 18	9.06473e-05	3.88255	3.88255
NM_183001	A_24_P68585	SHC1	SHC (Src homology 2 domain containing) transforming protein 1	0.000810538	2.46523	2.46523
NM_133636	A_24_P273635	HELQ	helicase, POLQ-like	0.00607969	2.08273	2.08273
NM_001188	A_23_P145357	BAK1	BCL2-antagonist/killer 1	0.000936134	2.34806	2.34806
NM_001130924	A_24_P522631	TMEM201	transmembrane protein 201	0.000661604	2.06996	2.06996
NM_198336	A_23_P22027	INSIG1	insulin induced gene 1	0.00586372	0.487245	-2.05235
THC2673187	A_32_P86604			0.000915106	3.29742	3.29742
NM_000481	A_24_P174503	AMT	aminomethyltransferase	0.00288881	2.01048	2.01048
BX647685	A_32_P17484			0.00536775	0.477204	-2.09554
NR_040023	A_24_P936363	ERVK13-1	endogenous retrovirus group K13, member 1	0.000418908	2.2393	2.2393
NM_004824	A_23_P134078	CDYL	chromodomain protein, Y-like	0.00401896	0.476549	-2.09842
NM_001100426	A_32_P85813	RAP1GDS1	RAP1, GTP-GDP dissociation stimulator 1	0.000935991	0.34416	-2.90563
NM_032813	A_24_P278853	TMTC4	transmembrane and tetratricopeptide repeat containing 4	0.000255986	0.389029	-2.5705
NM_152474	A_23_P303803	C19orf18	chromosome 19 open reading frame 18	0.00161009	2.54956	2.54956
NM_133369	A_23_P110557	UNC5A	unc-5 homolog A (C. elegans)	0.00791557	0.454337	-2.20101
NM_001032283	A_24_P210244	TMPO	thymopoietin	0.000591246	0.382808	-2.61227
NM_178433	A_23_P324538	LCE3B	late cornified envelope 3B	0.00045096	3.33923	3.33923
NM_138325	A_23_P390006	PCSK6	proprotein convertase subtilisin/kexin type 6	0.00843552	0.382103	-2.6171
NM_144601	A_24_P39508	CMTM3	CKLF-like MARVEL transmembrane domain containing 3	6.47813e-05	2.3179	2.3179
BC029473	A_32_P123293			0.00519685	0.340249	-2.93902
NM_004336	A_23_P124417	BUB1	budding uninhibited by benzimidazoles 1 homolog (yeast)	6.92281e-05	0.239696	-4.17195
NM_003019	A_32_P107617	SFTPD	surfactant protein D	0.00482426	0.428551	-2.33344
NM_025251	A_23_P424878	ARHGAP39	Rho GTPase activating protein 39	0.0102343	0.370043	-2.70239
NM_138492	A_24_P346101	PRELID2	PRELI domain containing 2	0.00131449	0.411839	-2.42813
NR_038366	A_24_P101282	HOTAIRM1	HOXA transcript antisense RNA, myeloid-specific 1 (non-protein coding)	0.000491823	2.52206	2.52206
NM_000429	A_23_P23996	MAT1A	methionine adenosyltransferase I, alpha	0.0127603	0.484908	-2.06225
NM_024103	A_32_P224522	SLC25A23	solute carrier family 25 (mitochondrial carrier; phosphate carrier), member 23	0.00986512	0.446567	-2.2393
NM_052916	A_32_P57810	RNF157	ring finger protein 157	0.00656606	0.472256	-2.1175
NM_133635	A_24_P14595	POFUT2	protein O-fucosyltransferase 2	3.88996e-05	2.20282	2.20282
NM_031953	A_24_P303097	SNX25	sorting nexin 25	0.000306141	0.33547	-2.98089
NM_000120	A_23_P34537	EPHX1	epoxide hydrolase 1, microsomal (xenobiotic)	0.00130853	2.70452	2.70452
A_24_P153003	?	?	?	0.00387355	0.496366	-2.01464
NM_001005336	A_23_P135273	DNM1	dynamin 1	0.00907361	0.485084	-2.0615
NM_003786	A_23_P207507	ABCC3	ATP-binding cassette, sub-family C (CFTR/MRP), member 3	0.000176655	2.77377	2.77377
NM_018113	A_23_P150931	LMBR1L	limb region 1 homolog (mouse)-like	0.000791236	2.23423	2.23423
NM_015205	A_24_P59403	ATP11A	ATPase, class VI, type 11A	0.0047666	0.480813	-2.07981
NM_016937	A_32_P1701	POLA1	polymerase (DNA directed), alpha 1, catalytic subunit	0.000123532	0.161193	-6.20376
NM_153213	A_23_P332326	ARHGEF19	Rho guanine nucleotide exchange factor (GEF) 19	0.00537834	0.461063	-2.1689
NM_006262	A_23_P13713	PRPH	peripherin	0.00297099	0.385318	-2.59526
NM_021968	A_23_P30805	HIST1H4J	histone cluster 1, H4j	0.00173269	0.454141	-2.20196
NM_001034	A_24_P234196	RRM2	ribonucleotide reductase M2	0.000931716	0.403687	-2.47717
NM_052957	A_23_P171237	ACRC	acidic repeat containing	0.000441631	3.14037	3.14037
NM_144765	A_23_P150379	MPZL2	myelin protein zero-like 2	0.000570207	2.32543	2.32543
THC2639056	A_24_P713312			0.00364875	2.79625	2.79625
NM_173463	A_32_P108738	CCDC149	coiled-coil domain containing 149	0.00220143	0.456235	-2.19185
ENST00000486620	A_24_P916195	TRMU	tRNA 5-methylaminomethyl-2-thiouridylate methyltransferase	0.00437916	0.19578	-5.10778
NM_014509	A_24_P340696	SERHL2	serine hydrolase-like 2	0.000129191	2.17372	2.17372
NM_004111	A_24_P84898	FEN1	flap structure-specific endonuclease 1	0.00158768	0.464158	-2.15444
NM_182751	A_24_P412088	MCM10	minichromosome maintenance complex component 10	0.000614489	0.308339	-3.24318
NM_017632	A_23_P258002	CDKN2AIP	CDKN2A interacting protein	0.0111616	2.0736	2.0736
NM_005932	A_23_P117274	MIPEP	mitochondrial intermediate peptidase	0.00139774	0.315724	-3.16732
NM_021992	A_23_P137173	TMSB15A	thymosin beta 15a	0.000615445	0.337385	-2.96398
A_24_P238525	?	?	?	0.00133923	2.02835	2.02835
CR933606	A_32_P201279	LOC642236	FSHD region gene 1 pseudogene	0.0068039	2.33427	2.33427
NM_006143	A_23_P99285	GPR19	G protein-coupled receptor 19	0.00234798	0.266168	-3.75702
NM_018087	A_24_P222192	TMEM48	transmembrane protein 48	0.000226624	0.410272	-2.43741
ENST00000432564	A_23_P394246	HCAR1	hydroxycarboxylic acid receptor 1	0.00675705	0.241684	-4.13764
NM_004233	A_23_P70670	CD83	CD83 molecule	0.000224565	2.12676	2.12676
NM_006247	A_23_P153583	PPP5C	protein phosphatase 5, catalytic subunit	0.00462785	0.495219	-2.01931
NM_003645	A_23_P140450	SLC27A2	solute carrier family 27 (fatty acid transporter), member 2	0.000457763	0.322969	-3.09627
NM_024884	A_23_P106158	L2HGDH	L-2-hydroxyglutarate dehydrogenase	0.00010524	0.473208	-2.11324
NM_001040619	A_24_P33895	ATF3	activating transcription factor 3	0.001257	4.95765	4.95765
NM_020998	A_24_P148796	MST1	macrophage stimulating 1 (hepatocyte growth factor-like)	0.00149881	3.56058	3.56058
NM_020148	A_23_P135878	SPIRE1	spire homolog 1 (Drosophila)	0.00162492	0.414503	-2.41253
NR_027288	A_24_P195621	LOC341056	SUMO1 activating enzyme subunit 1 pseudogene	0.000939783	0.460787	-2.1702
CB250445	?	?	?	0.000316637	3.44149	3.44149
A_23_P57836	?	?	?	0.000470466	4.29903	4.29903
NR_028272	A_24_P566916	NEAT1	nuclear paraspeckle assembly transcript 1 (non-protein coding)	0.00373919	2.04109	2.04109
NM_002222	A_23_P92042	ITPR1	inositol 1,4,5-trisphosphate receptor, type 1	0.00545745	0.388628	-2.57315
NM_012238	A_23_P98022	SIRT1	sirtuin 1	0.0122673	2.68547	2.68547
NM_001104629	A_32_P6139	C4orf19	chromosome 4 open reading frame 19	0.00816826	0.498222	-2.00714
NM_002926	A_23_P352435	RGS12	regulator of G-protein signaling 12	0.000349693	3.41923	3.41923
AK092180	A_24_P491087	CCT6P1	chaperonin containing TCP1, subunit 6 (zeta) pseudogene 1	0.00326662	2.18874	2.18874
NM_025124	A_23_P161522	TMEM134	transmembrane protein 134	0.00111535	2.04212	2.04212
NR_026961	A_32_P738377	LOC284837	uncharacterized LOC284837	0.000797665	2.75972	2.75972
NM_004970	A_23_P14892	IGFALS	insulin-like growth factor binding protein, acid labile subunit	0.000507728	3.01306	3.01306
NM_006009	A_23_P139547	TUBA1A	tubulin, alpha 1a	0.00218279	0.443611	-2.25423
NM_024911	A_24_P256380	WLS	wntless homolog (Drosophila)	0.00198985	0.331911	-3.01286
NM_015332	A_24_P218056	NUDCD3	NudC domain containing 3	0.00670721	0.499912	-2.00035
CU692385	A_32_P235783			0.0100262	0.432873	-2.31014
ENST00000395383	?	?	?	0.00990831	5.58949	5.58949
NM_024596	A_23_P84350	MCPH1	microcephalin 1	0.00643457	0.280075	-3.57047
NM_001080435	A_24_P307827	WHAMM	WAS protein homolog associated with actin, golgi membranes and microtubules	7.54279e-05	2.14421	2.14421
NM_014045	A_24_P99216	LRP10	low density lipoprotein receptor-related protein 10	0.000478713	2.78775	2.78775
NM_205853	A_24_P272310	MUSTN1	musculoskeletal, embryonic nuclear protein 1	0.00349265	2.00271	2.00271
NM_172127	A_24_P114739	CAMK2D	calcium/calmodulin-dependent protein kinase II delta	0.000125582	0.241471	-4.14128
NM_001042483	A_24_P270728	NUPR1	nuclear protein, transcriptional regulator, 1	0.00193148	30.4529	30.4529
NM_003695	A_23_P134764	LY6D	lymphocyte antigen 6 complex, locus D	0.000641936	3.72553	3.72553
NM_000691	A_23_P207213	ALDH3A1	aldehyde dehydrogenase 3 family, member A1	0.00429135	2.65205	2.65205
NM_013236	A_24_P391368	ATXN10	ataxin 10	0.0001302	0.400453	-2.49717
NM_004095	A_23_P22224	EIF4EBP1	eukaryotic translation initiation factor 4E binding protein 1	0.00131473	0.404095	-2.47467
NM_018979	A_23_P84587	WNK1	WNK lysine deficient protein kinase 1	0.00913865	0.3818	-2.61917
NM_014861	A_23_P117992	ATP2C2	ATPase, Ca++ transporting, type 2C, member 2	0.00390761	0.471715	-2.11993
[truncated: 605 more rows]
